# Supplementary material for: An orifice design: water insertion into C60
Source: Royal Society of Chemistry journal article supplement (doi:10.1039/d0ra09067k), 2020-01-01
Supplement: d0ra09067k1.pdf [file d0ra09067k1.pdf]

## Supporting Information

### An Orifice Design: Water Insertion into C<sub>60</sub>

Yoshifumi Hashikawa, Kazuro Kizaki, Takashi Hirose, and Yasujiro Murata\*

*Institute for Chemical Research, Kyoto University, Uji, Kyoto 611-0011, Japan*

*Fax: (+81)774-38-3178*

*E-mail: yasujiro@scl.kyoto-u.ac.jp*

## Contents

|                                                                                                                                                    |     |
|----------------------------------------------------------------------------------------------------------------------------------------------------|-----|
| 1. General                                                                                                                                         | S3  |
| 2. Computational Methods                                                                                                                           | S3  |
| 3. Synthesis                                                                                                                                       | S4  |
| 3.1. Synthesis of <b>2f</b>                                                                                                                        | S4  |
| 3.2. Synthesis of H <sub>2</sub> O@ <b>3f</b> from <b>2f</b>                                                                                       | S7  |
| 3.3. Synthesis of H <sub>2</sub> O@C <sub>60</sub> from <b>2f</b>                                                                                  | S10 |
| 3.4. Synthesis of H <sub>2</sub> O@C <sub>60</sub> from H <sub>2</sub> O@ <b>3f</b>                                                                | S11 |
| 4. Single Crystal X-Ray Structure                                                                                                                  |     |
| of [(H <sub>2</sub> O) <sub>0.593(8)</sub> @{(3f) <sub>0.854(2)</sub> (3f) <sub>0.146(2)</sub> }]•(C <sub>6</sub> H <sub>6</sub> ) <sub>2.85</sub> | S12 |
| 5. Natural Population Analyses of <b>INT1</b> and <b>INT3</b>                                                                                      | S14 |
| 6. Stabilization Energies of <b>INT2</b>                                                                                                           | S28 |
| 7. Mechanistic Studies on H <sub>2</sub> O-Insertion into <b>INT1</b>                                                                              | S38 |
| 8. References                                                                                                                                      | S64 |

## 1. General

The  $^1\text{H}$  and  $^{13}\text{C}$  NMR measurements were carried out at room temperature unless otherwise noted with a JEOL JNM ECA500 instrument. The NMR chemical shifts were reported in ppm with reference to residual protons and carbons of  $\text{CDCl}_3$  ( $\delta$  7.26 ppm in  $^1\text{H}$  NMR,  $\delta$  77.00 ppm in  $^{13}\text{C}$  NMR) and acetone- $d_6$  ( $\delta$  2.05 ppm in  $^1\text{H}$  NMR,  $\delta$  29.92 ppm in  $^{13}\text{C}$  NMR). APCI (atmospheric pressure chemical ionization) mass spectra were measured on a Bruker micrOTOF-Q II. The high-performance liquid chromatography (HPLC) was performed with the use of a Cosmosil Buckyprep column (250 mm in length, 4.6 mm in inner diameter) for analytical purpose. Thin layer chromatography (TLC) was performed on glass plates coated with 0.25 mm thick silica gel 60F-254 (Merck). Column chromatography was performed using PSQ 60B (Fuji Silysia).

Fullerene  $\text{C}_{60}$  was purchased from SES Research Co. Toluene and tetrahydrofuran were purchased from Kanto Chemical Co., Inc. *N*-Methylmorpholine *N*-oxide (NMO) and carbon disulfide were purchased from FUJIFILM Wako Pure Chemical Corporation. Ethyl acetate was purchased from Nacalai Tesque, Inc. Tri(*p*-tolyl)phosphine, triphenylphosphine, and triisopropyl phosphite were purchased from Tokyo Chemical Industry Co., Ltd. *o*-Dichlorobenzene (ODCB) and 1-chloronaphthalene were purchased from Sigma-Aldroch Co. LLC. **INT3f** was synthesized according to the literature.<sup>1</sup>

All reactions were carried out under Ar atmosphere. Unless otherwise noted, materials purchased from commercial suppliers were used without further purification.

## 2. Computational Methods

All calculations were conducted using the Gaussian 09 program. All structures at the stationary states were optimized at the B3LYP-D3/6-31G(d) level of theory without any symmetry assumptions and confirmed by the frequency analyses at the same level of theory. The natural population analyses were carried out at the B3LYP-D3/6-31G(d) level of theory.

### 3. Synthesis

#### 3.1. Synthesis of 2f

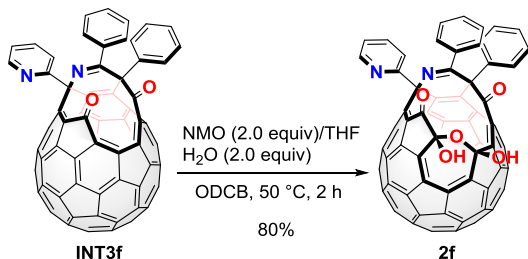

**INT3f** (700 mg, 676  $\mu\text{mol}$ ) was placed into a 500-mL two-neck flask and degassed through three vacuum-Ar cycles. *o*-Dichlorobenzene (ODCB) (8.80 mL) and then distilled water (24.3  $\mu\text{L}$ , 1.35 mmol, 2.00 equiv) were added. *N*-methylmorpholine *N*-oxide (NMO) (177 mg, 1.51 mmol, 2.23 equiv) dissolved in THF (62.0 mL) was further added to the flask at room temperature. The reaction mixture was then heated at 60 °C for 1.5 h. After passing through a silica gel pad (toluene/hexane (3:1)) for removal of unreacted NMO, the remaining THF was removed under reduced pressure. The crude mixture in ODCB was purified by silica gel column chromatography (CS<sub>2</sub>/EtOAc (40:1) to (5:1)) to give unreacted **INT3f** (61.9 mg, 59.8  $\mu\text{mol}$ , 9%) and **2f** (583 mg, 538  $\mu\text{mol}$ , 80%).

**2f**: <sup>1</sup>H NMR (500 MHz, CS<sub>2</sub>/acetone-*d*<sub>6</sub> (2:1))  $\delta$  8.47 (d, 1H, *J* = 5.73 Hz), 8.26 (d, 2H, *J* = 8.02 Hz), 7.91 (d, 1H, *J* = 8.02 Hz), 7.87 (dt, 1H, *J* = 7.45, 1.72 Hz), 7.75 (br d, 1H, *J* = 7.45 Hz), 7.56 (br s, 1H), 7.45 (br t, 1H, *J* = 5.73 Hz), 7.39 (t, 1H, *J* = 7.45 Hz), 7.30–7.24 (m, 5H), 7.21 (br d, 1H, *J* = 7.45 Hz), 6.37 (br s, 1H); <sup>13</sup>C NMR (126 MHz, CS<sub>2</sub>/acetone-*d*<sub>6</sub> (2:1))  $\delta$  194.23, 191.30, 165.55, 159.77, 150.77, 150.75, 150.66, 150.28, 150.06, 149.98, 149.90, 149.72, 149.28, 149.19, 149.07, 149.03, 149.00, 148.62, 148.18, 148.12, 147.99, 147.79, 147.56, 147.33, 146.86, 146.71, 146.04, 146.02, 145.99, 145.97, 145.09, 144.82, 144.16, 143.60, 143.55, 142.87, 142.77, 142.09, 141.84, 141.74, 141.44, 141.39, 141.22, 140.85, 139.87, 139.26, 138.80, 138.65, 138.44, 137.73, 137.69, 137.66, 137.59, 136.74, 136.49, 135.45, 135.31, 135.11, 134.67, 134.17, 131.76, 131.70, 131.41, 130.70, 130.14, 130.05, 128.19, 127.13, 126.95, 125.55, 124.68, 123.38, 110.19, 96.76, 72.80, 60.02 (The sum of carbon signals must be 76 in theory. Observed 76.); HRMS (APCI, negative ion mode) calcd for C<sub>80</sub>H<sub>14</sub>N<sub>2</sub>O<sub>4</sub> (**2f**–H<sub>2</sub>O) 1066.0959, found 1066.0937.

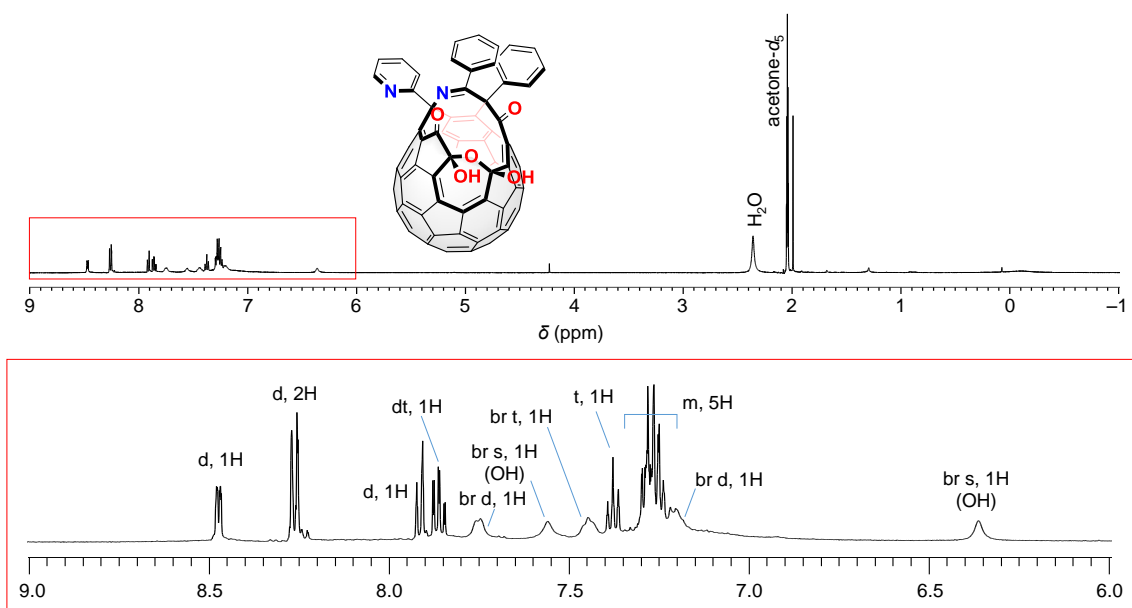

**Figure S1.**  $^1\text{H}$  NMR spectra (500 MHz,  $\text{CS}_2/\text{acetone-}d_6$  (2:1)) of **2f**.

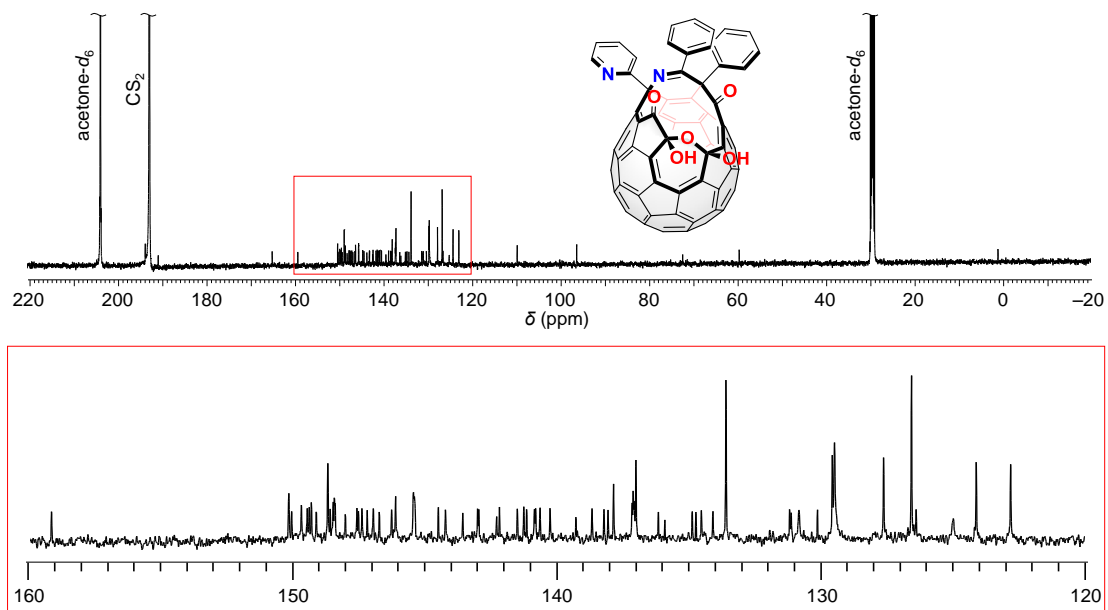

**Figure S2.**  $^{13}\text{C}$  NMR spectra (126 MHz,  $\text{CS}_2/\text{acetone-}d_6$  (2:1)) of **2f**.

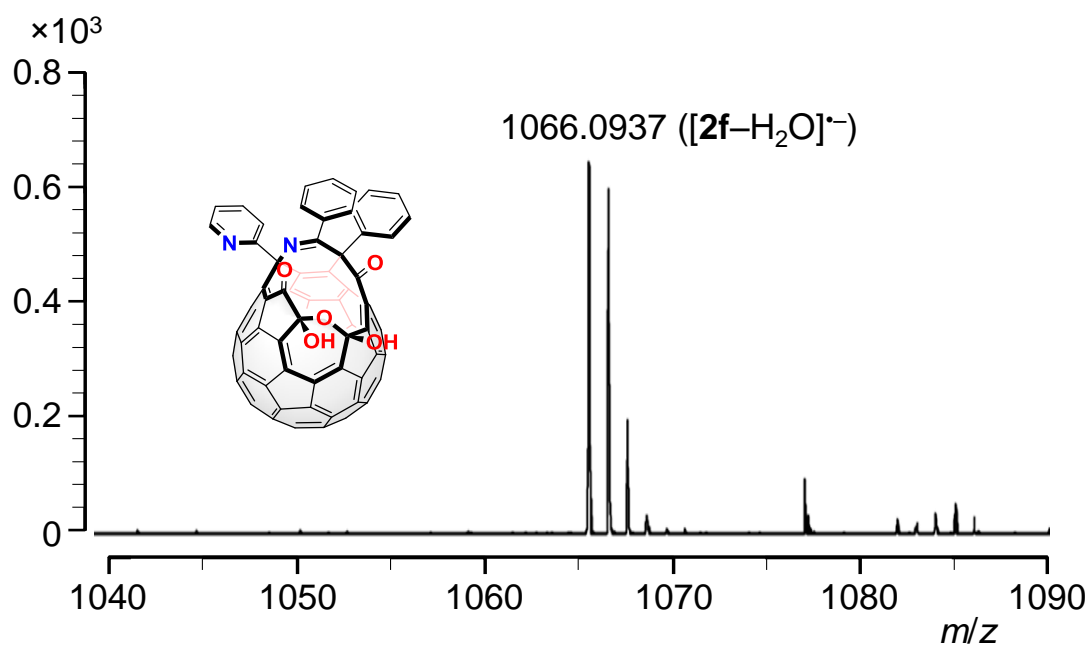

**Figure S3.** APCI mass spectrum (negative ion mode) of **2f**.

### 3.2. Synthesis of H<sub>2</sub>O@3f from 2f

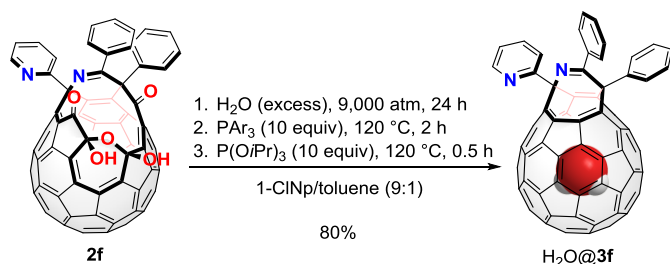

**2f** (160 mg, 147  $\mu$ mol) was dissolved in a mixed solvent system including 1-chloronaphthalene and toluene (9:1, 3.5 mL). The reaction mixture was heated at 160 °C under 9,000 atm for 24 h. The resulting solution was then transferred into a 25-mL Schlenk tube containing P(*p*-tolyl)<sub>3</sub> (449 mg, 1.47 mmol, 9.99 equiv) and degassed under reduced pressure. After adding toluene (0.30 mL) for washing the reaction vessel, the reaction mixture was heated at 120 °C for 2 h. After cooling down to room temperature, P(O*i*Pr)<sub>3</sub> (340  $\mu$ L distilled from CaH<sub>2</sub>,  $\rho$  = 0.9035 g/mL, 1.48 mmol, 10.0 equiv) was further added and heated at 120 °C for 0.5 h. The crude mixture was purified by silica gel column chromatography (CS<sub>2</sub>/EtOAc (30:1)) to give H<sub>2</sub>O@**3f** (121 mg, 118  $\mu$ mol, H<sub>2</sub>O: 98%) in 80% isolated yield.

H<sub>2</sub>@**3f** (H<sub>2</sub>O: 98%): <sup>1</sup>H NMR (500 MHz, CDCl<sub>3</sub>)  $\delta$  8.82 (d, 1H,  $J$  = 5.15 Hz), 8.08 (d, 1H,  $J$  = 8.02 Hz), 7.94 (t, 1H,  $J$  = 7.45 Hz), 7.93 (t, 1H,  $J$  = 7.45 Hz), 7.45–7.40 (m, 2H), 7.25–7.12 (m, 7H), –6.11 (s, 1.96H); <sup>13</sup>C NMR (201 MHz, CDCl<sub>3</sub>)  $\delta$  169.30, 164.86, 149.61, 148.18, 145.91, 145.86, 145.75, 145.66, 145.63, 145.18, 144.91, 144.88, 144.86, 144.74, 144.70, 144.67, 144.60, 144.56, 144.534, 144.527, 144.36, 4.31, 144.27, 144.26, 144.24, 144.21, 144.20, 144.14, 144.09, 143.89, 143.85, 143.84, 143.75, 143.70, 143.56, 143.26, 141.89, 141.28, 141.24, 141.15, 141.14, 140.99, 140.63, 140.48, 139.34, 139.23, 138.75, 138.65, 138.52, 137.32, 137.24, 137.20, 136.96, 136.95, 135.83, 135.53, 135.31, 135.16, 132.10, 132.02, 131.36, 131.28, 129.19, 129.09, 128.80, 128.73, 128.37, 127.72, 127.54, 127.38, 126.67, 125.83, 125.46, 123.36, 73.01, 56.81 (The sum of carbon signals must be 76 in theory. Observed 76.); HRMS (APCI, negative ion mode) calcd for C<sub>80</sub>H<sub>14</sub>N<sub>2</sub> (**3f**) 1002.1151, found 1002.1180 and calcd for C<sub>80</sub>H<sub>16</sub>N<sub>2</sub>O<sub>1</sub> (H<sub>2</sub>O@**3f**) 1020.1268, found 1020.1255.

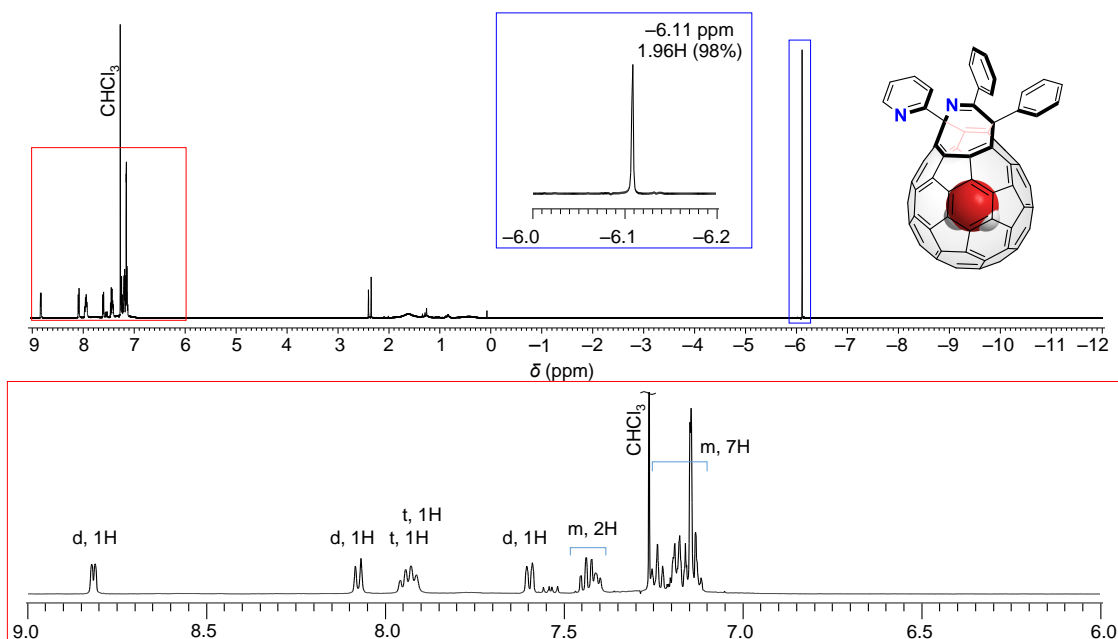

**Figure S4.**  $^1\text{H}$  NMR spectra (500 MHz,  $\text{CDCl}_3$ ) of  $\text{H}_2\text{O}@3\mathbf{f}$  ( $\text{H}_2\text{O}$ : 98%).

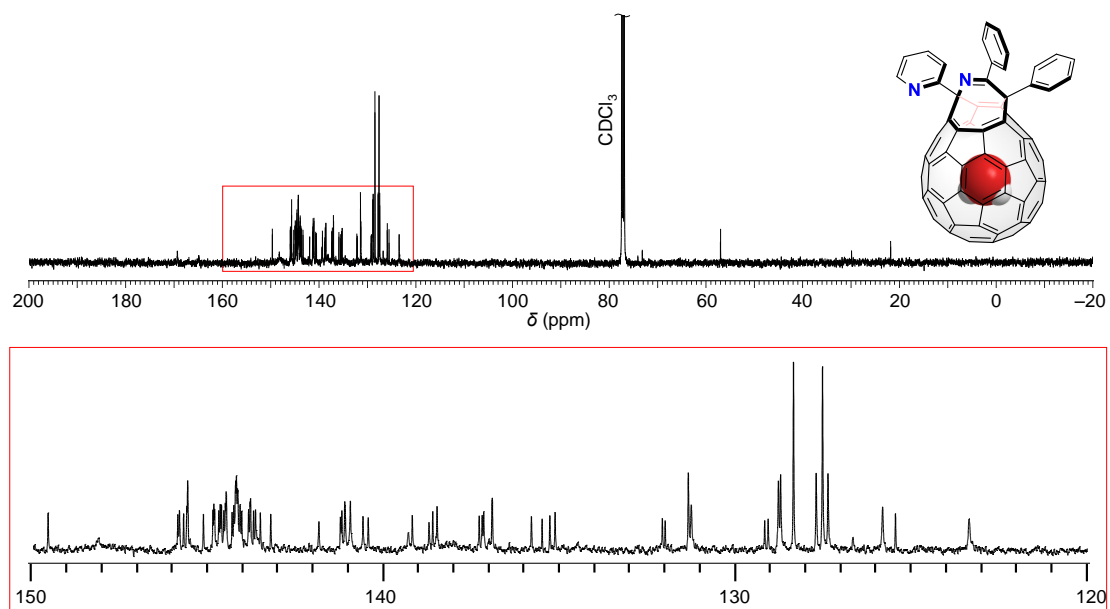

**Figure S5.**  $^{13}\text{C}$  NMR spectra (126 MHz,  $\text{CDCl}_3$ ) of  $\text{H}_2\text{O}@3\mathbf{f}$  ( $\text{H}_2\text{O}$ : 98%).



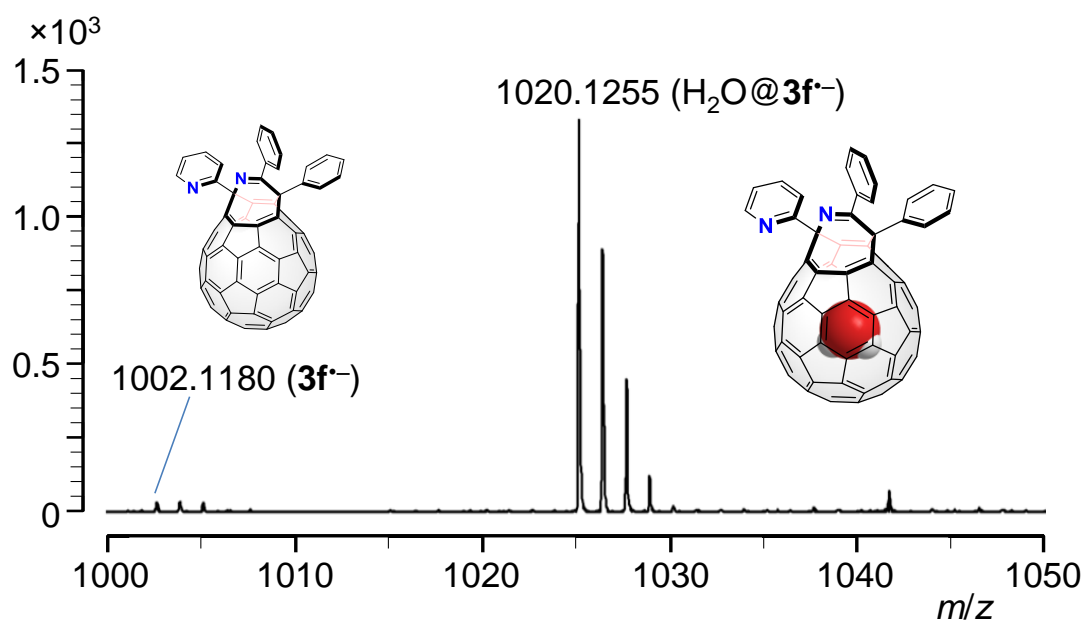

**Figure S6.** APCI mass spectrum (negative ion mode) of  $H_2O@3f$  ( $H_2O$ : 98%).

### 3.3. Synthesis of H<sub>2</sub>O@C<sub>60</sub> from 2f

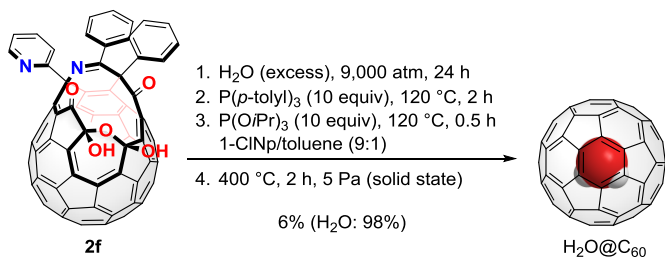

**2f** (160 mg, 147  $\mu$ mol) was dissolved in a mixed solvent system including 1-chloronaphthalene and toluene (9:1, 3.5 mL). The reaction mixture was heated at 160 °C under 9,000 atm for 24 h. The resulting solution was then transferred into a 25-mL Schlenk tube containing P(*p*-tolyl)<sub>3</sub> (449 mg, 1.47 mmol, 10.0 equiv) and degassed under reduced pressure. The reaction mixture was heated at 120 °C for 2 h. After cooling down to room temperature, P(*OiPr*)<sub>3</sub> (340  $\mu$ L,  $\rho$  = 0.9035 g/mL, 1.48 mmol, 10.0 equiv) was further added and heated at 120 °C for 0.5 h. The crude mixture was reprecipitated by addition of methanol (80 mL). The resulting powder was placed into a 20-mL test tube and heated at 400 °C under 5 Pa for 2 h. The chromatographic purification using silica gel (toluene) gave H<sub>2</sub>O@C<sub>60</sub> (6.2 mg, 8.4  $\mu$ mol, H<sub>2</sub>O: 98%) in 6% isolated yield.

H<sub>2</sub>O@C<sub>60</sub>: <sup>1</sup>H NMR (500 MHz, CDCl<sub>3</sub>/CS<sub>2</sub> (1:1))  $\delta$  -4.64 (s, 2H); HRMS (APCI, negative ion mode) calcd for C<sub>60</sub>H<sub>2</sub>O (H<sub>2</sub>O@C<sub>60</sub><sup>-</sup>) 738.0113, found 738.0140.

### 3.4. Synthesis of H<sub>2</sub>O@C<sub>60</sub> from H<sub>2</sub>O@3f

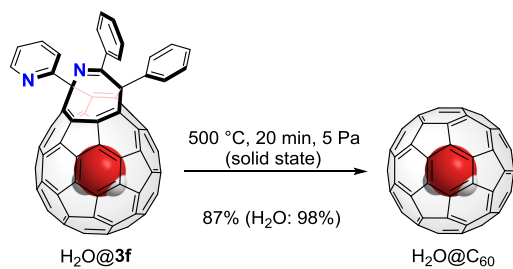

H<sub>2</sub>O@3f (102 mg, 100 μmol, H<sub>2</sub>O: 98%) wrapped with an aluminum foil was placed into a 20-mL test tube and heated at 500 °C under 5 Pa for 20 min. The chromatographic purification using silica gel (CS<sub>2</sub>) gave H<sub>2</sub>O@C<sub>60</sub> (64.1 mg, 86.8 μmol, H<sub>2</sub>O: 98%) in 87% isolated yield.

#### 4. Single Crystal X-Ray-Structure of $[(\text{H}_2\text{O})_{0.593(8)}@ \{(\mathbf{3f})_{0.854(2)}(\mathbf{3f})_{0.146(2)}\}] \cdot (\text{C}_6\text{H}_6)_{2.85}$

Single crystals of  $\text{H}_2\text{O}@\mathbf{3f}$  were obtained from a benzene/hexane solution by slow evaporation. Intensity data were collected at 100 K on a Bruker Single Crystal CCD X-ray Diffractometer (SMART APEX II) with Mo  $K\alpha$  radiation ( $\lambda = 0.71073 \text{ \AA}$ ) and graphite monochromator. A total of 13432 reflections were measured at the maximum  $2\theta$  angle of  $50.08^\circ$ , of which 9533 were independent reflections ( $R_{\text{int}} = 0.0188$ ). The structure was solved by direct methods (SHELXS-97<sup>2</sup>) and refined by the full-matrix least-squares on  $F^2$  (SHELXL-97<sup>2</sup>). A benzene molecule was disordered, which was solved using appropriate models. Thus, (C89–C90–C92–C94–C97–C98) and (C115–C116–C117–C118–C119–C120) were placed and their occupancies were refined to be 0.731(11) and 0.269(11), respectively. A part of orifice structure was disordered together with a benzene molecule, which was solved using appropriate models. Thus, [(C1–C2–C3–C5–C6–C8–C9–C64–C65–C66–C67–C68–C69–C70–C71–C72–C73–C74–C75) and (C85–C89–C91–C93–C95–C96)] and (C99–C100–C101–C102–C103–C104–C105–C106–C107–C108–C109–C110–C111–C112–C113–C114–C121–C122–C123) were placed and their occupancies were refined to be 0.854(2) and 0.146(2), respectively. The occupancy of the encapsulated water molecule was refined to be 0.593(8). All non-hydrogen atoms and a part of disordered moieties were refined anisotropically. All hydrogen atoms except for that of the encapsulated water molecule were placed using AFIX instructions. The crystal data are as follows:  $\text{C}_{97.12}\text{H}_{32.31}\text{N}_2\text{O}_{0.59}$ ; FW = 1236.54, crystal size  $0.19 \times 0.07 \times 0.04 \text{ mm}^3$ , triclinic,  $P-1$ ,  $a = 10.005(4) \text{ \AA}$ ,  $b = 12.857(5) \text{ \AA}$ ,  $c = 22.495(9) \text{ \AA}$ ,  $\alpha = 98.332(5)^\circ$ ,  $\beta = 97.908(5)^\circ$ ,  $\gamma = 104.389(6)^\circ$ ,  $V = 2727.2(18) \text{ \AA}^3$ ,  $Z = 2$ ,  $D_c = 1.506 \text{ g cm}^{-3}$ . The refinement converged to  $R_1 = 0.0532$ ,  $wR_2 = 0.1399$  ( $I > 2\sigma(I)$ ), GOF = 1.028. The data was deposited at the Cambridge Crystallographic Data Centre (CCDC 1999283).

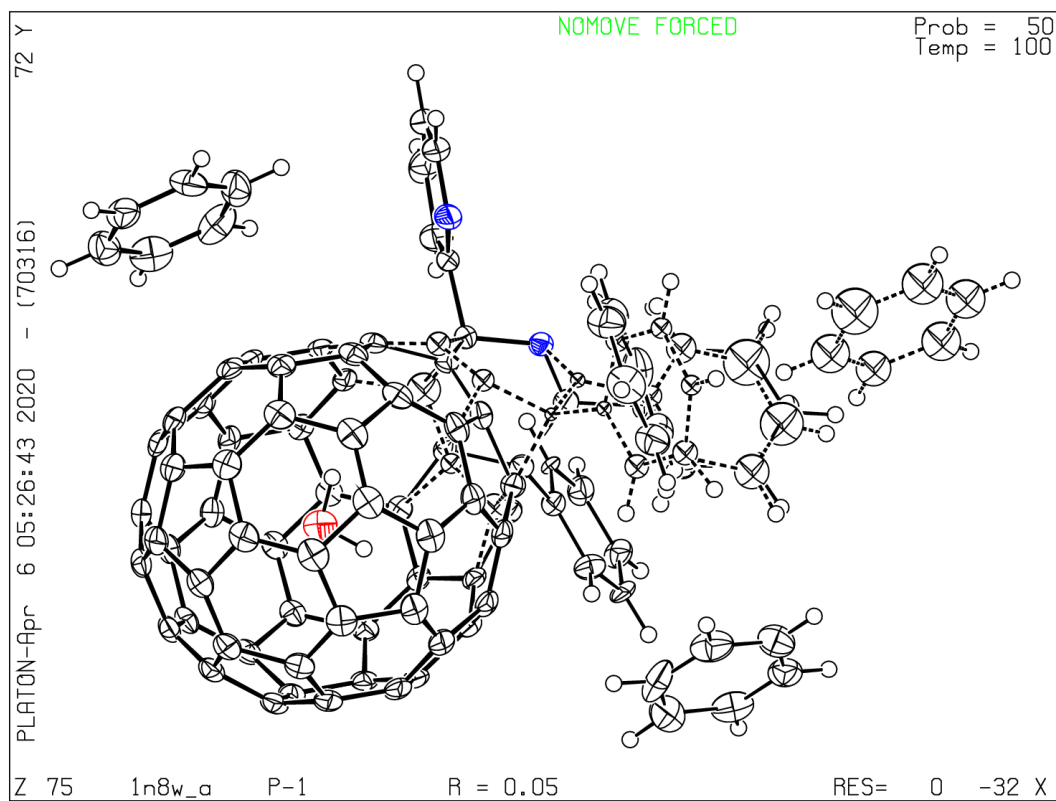

**Figure S7.** Single crystal X-ray structure of  $[(\text{H}_2\text{O})_{0.593(8)}@ \{(\mathbf{3f})_{0.854(2)}(\mathbf{3f})_{0.146(2)}\}] \cdot (\text{C}_6\text{H}_6)_{2.85}$ .

## 5. Natural Population Analyses of INT1 and INT3

The natural charges of carbonyl groups in **INT1** and **INT3** were calculated at the B3LYP-D3/6-31G(d) level of theory.

**Table S1.** Natural charges of **INT1** (B3LYP-D3/6-31G(d))

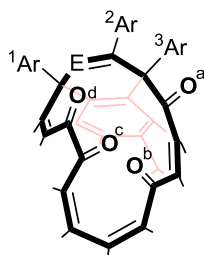

| Addends  | C(a)/O(a)     | C(b)/O(b)     | C(c)/O(c)     | C(d)/O(d)     |
|----------|---------------|---------------|---------------|---------------|
| <b>a</b> | +0.588/−0.499 | +0.557/−0.494 | +0.490/−0.465 | +0.500/−0.478 |
| <b>b</b> | +0.586/−0.490 | +0.557/−0.495 | +0.491/−0.464 | +0.501/−0.475 |
| <b>c</b> | +0.589/−0.490 | +0.559/−0.502 | +0.491/−0.467 | +0.501/−0.476 |
| <b>d</b> | +0.589/−0.494 | +0.556/−0.487 | +0.489/−0.461 | +0.499/−0.473 |
| <b>e</b> | +0.583/−0.491 | +0.557/−0.494 | +0.488/−0.465 | +0.494/−0.455 |
| <b>f</b> | +0.575/−0.476 | +0.557/−0.490 | +0.489/−0.464 | +0.496/−0.457 |

**Table S2.** Natural charges of **INT3** (B3LYP-D3/6-31G(d))

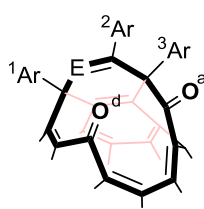

| Addends  | C(a)/O(a)     | C(d)/O(d)     |
|----------|---------------|---------------|
| <b>a</b> | +0.583/−0.510 | +0.561/−0.474 |
| <b>b</b> | +0.579/−0.502 | +0.563/−0.469 |
| <b>c</b> | +0.584/−0.511 | +0.560/−0.467 |
| <b>d</b> | +0.576/−0.497 | +0.562/−0.469 |
| <b>e</b> | +0.577/−0.501 | +0.561/−0.469 |
| <b>f</b> | +0.574/−0.491 | +0.559/−0.469 |

**Table S3.** Optimized structure of INT1a (B3LYP-D3/6-31G(d))

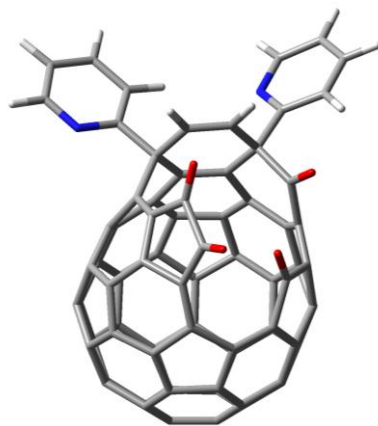

Standard orientation:

| Center Number | Atomic Number | Atomic Type | Coordinates (Angstroms) |           |           |
|---------------|---------------|-------------|-------------------------|-----------|-----------|
|               |               |             | X                       | Y         | Z         |
| 1             | 6             | 0           | 3.938394                | -0.266728 | 1.294137  |
| 2             | 6             | 0           | 3.736868                | 1.034782  | 1.117629  |
| 3             | 6             | 0           | 2.782817                | 1.625838  | 0.112523  |
| 4             | 6             | 0           | 1.540318                | 2.263150  | 0.770907  |
| 5             | 6             | 0           | 1.195302                | 2.120592  | 2.115678  |
| 6             | 6             | 0           | 1.782211                | 1.506110  | 3.366633  |
| 7             | 6             | 0           | 0.543635                | 1.049145  | 4.239101  |
| 8             | 6             | 0           | -0.665744               | 1.360764  | 3.414406  |
| 9             | 6             | 0           | -1.975749               | 0.904768  | 3.224564  |
| 10            | 6             | 0           | -2.527115               | -0.490185 | 3.047784  |
| 11            | 6             | 0           | -1.838041               | -1.695186 | 2.854440  |
| 12            | 6             | 0           | -0.342600               | -1.950562 | 2.945843  |
| 13            | 6             | 0           | -0.015680               | -2.858780 | 1.766625  |
| 14            | 6             | 0           | 1.091538                | -2.708773 | 0.933153  |
| 15            | 6             | 0           | 2.403564                | -2.216045 | 1.442425  |
| 16            | 6             | 0           | 3.260282                | -1.342372 | 0.480355  |
| 17            | 7             | 0           | 4.754571                | -1.797619 | -1.392810 |
| 18            | 8             | 0           | 2.917475                | 1.453886  | 3.772631  |
| 19            | 8             | 0           | 2.812654                | -2.525505 | 2.544704  |
| 20            | 7             | 0           | 3.383874                | 3.948920  | -0.442114 |
| 21            | 6             | 0           | 2.372858                | -0.782112 | -0.605560 |
| 22            | 6             | 0           | 1.253580                | 1.029621  | -1.808844 |
| 23            | 8             | 0           | 0.604420                | 0.765625  | 5.408379  |
| 24            | 6             | 0           | 1.530746                | -1.736227 | -1.293936 |
| 25            | 6             | 0           | 0.536936                | 2.764910  | -0.170517 |
| 26            | 8             | 0           | 0.443140                | -1.403008 | 3.685217  |
| 27            | 6             | 0           | -0.696664               | 2.443009  | -2.307081 |
| 28            | 6             | 0           | 4.111331                | 4.845814  | -1.123616 |
| 29            | 6             | 0           | -1.884969               | 3.054671  | -1.736563 |
| 30            | 6             | 0           | 3.584655                | 2.655482  | -0.707442 |
| 31            | 6             | 0           | 0.473955                | 2.233985  | -1.542048 |
| 32            | 6             | 0           | 0.781448                | 0.097623  | -2.740987 |
| 33            | 6             | 0           | 2.197950                | 0.563394  | -0.818941 |
| 34            | 6             | 0           | -1.856702               | 3.481209  | -0.421198 |
| 35            | 6             | 0           | -0.436267               | 0.304231  | -3.479092 |
| 36            | 6             | 0           | -1.012127               | 3.100267  | 1.690765  |

|    |   |   |           |           |           |
|----|---|---|-----------|-----------|-----------|
| 37 | 6 | 0 | -1.162316 | 1.465018  | -3.273167 |
| 38 | 6 | 0 | 0.895781  | -1.316697 | -2.459551 |
| 39 | 6 | 0 | 0.897933  | -2.792108 | -0.501603 |
| 40 | 6 | 0 | -0.634002 | 3.359364  | 0.332743  |
| 41 | 6 | 0 | 4.999656  | -3.256028 | 0.502793  |
| 42 | 6 | 0 | 4.378646  | -2.197855 | -0.169738 |
| 43 | 6 | 0 | -4.074666 | 2.485399  | -0.015512 |
| 44 | 6 | 0 | -0.286108 | -3.377546 | -0.991276 |
| 45 | 6 | 0 | -0.286795 | -1.965626 | -2.981203 |
| 46 | 6 | 0 | 6.037125  | -3.933269 | -0.137077 |
| 47 | 6 | 0 | -0.179033 | 2.362820  | 2.494074  |
| 48 | 6 | 0 | -2.613544 | 1.403291  | -3.223891 |
| 49 | 6 | 0 | 5.058815  | 4.498227  | -2.084399 |
| 50 | 6 | 0 | -4.624792 | 1.399109  | 0.781657  |
| 51 | 6 | 0 | -3.268423 | 0.173289  | -3.333212 |
| 52 | 6 | 0 | -2.422433 | 2.887679  | 1.760339  |
| 53 | 6 | 0 | 6.423423  | -3.532632 | -1.414800 |
| 54 | 6 | 0 | 4.523160  | 2.199176  | -1.643855 |
| 55 | 6 | 0 | -2.873607 | 1.776731  | 2.480787  |
| 56 | 6 | 0 | 5.751484  | -2.455791 | -1.993837 |
| 57 | 6 | 0 | -1.111496 | -0.972377 | -3.632005 |
| 58 | 6 | 0 | -5.082685 | 0.367897  | -0.128477 |
| 59 | 6 | 0 | -4.318524 | -1.329272 | 1.485769  |
| 60 | 6 | 0 | -2.978742 | 3.196110  | 0.462245  |
| 61 | 6 | 0 | -1.374711 | -3.684542 | -0.095980 |
| 62 | 6 | 0 | -3.059841 | 2.385699  | -2.258902 |
| 63 | 6 | 0 | -4.364849 | -0.141855 | -2.433484 |
| 64 | 6 | 0 | -4.001269 | 1.036847  | 1.979243  |
| 65 | 6 | 0 | 5.268425  | 3.141716  | -2.344719 |
| 66 | 6 | 0 | -1.252166 | -3.308536 | 1.237864  |
| 67 | 6 | 0 | -3.804711 | -0.346334 | 2.336529  |
| 68 | 6 | 0 | -4.781933 | 0.794274  | -1.484996 |
| 69 | 6 | 0 | -4.133945 | 2.093047  | -1.407848 |
| 70 | 6 | 0 | -2.360396 | -2.676294 | 1.930840  |
| 71 | 6 | 0 | -2.501291 | -1.042364 | -3.543302 |
| 72 | 6 | 0 | -3.120304 | -2.109438 | -2.774315 |
| 73 | 6 | 0 | -0.872903 | -2.997314 | -2.257950 |
| 74 | 6 | 0 | -4.553843 | -1.955742 | -0.768638 |
| 75 | 6 | 0 | -2.319429 | -3.067121 | -2.145448 |
| 76 | 6 | 0 | -2.629508 | -3.493992 | -0.795353 |
| 77 | 6 | 0 | -3.575187 | -2.540083 | 1.277285  |
| 78 | 6 | 0 | -4.951668 | -0.972172 | 0.227759  |
| 79 | 6 | 0 | -3.714434 | -2.938869 | -0.117139 |
| 80 | 6 | 0 | -4.262578 | -1.547585 | -2.075626 |
| 81 | 1 | 0 | 4.605099  | -0.620491 | 2.073185  |
| 82 | 1 | 0 | 4.244221  | 1.750398  | 1.753629  |
| 83 | 1 | 0 | 3.921954  | 5.890561  | -0.883864 |
| 84 | 1 | 0 | 4.685273  | -3.534827 | 1.501356  |
| 85 | 1 | 0 | 6.534660  | -4.761751 | 0.359598  |
| 86 | 1 | 0 | 5.617460  | 5.267338  | -2.609042 |
| 87 | 1 | 0 | 7.224550  | -4.034025 | -1.949000 |
| 88 | 1 | 0 | 4.656342  | 1.132221  | -1.803416 |
| 89 | 1 | 0 | 6.023777  | -2.101513 | -2.986497 |
| 90 | 1 | 0 | 6.001768  | 2.825119  | -3.081524 |

The total electronic energy was calculated to be -3236.212597 Hartree.

**Table S4.** Optimized structure of INT1b (B3LYP-D3/6-31G(d))

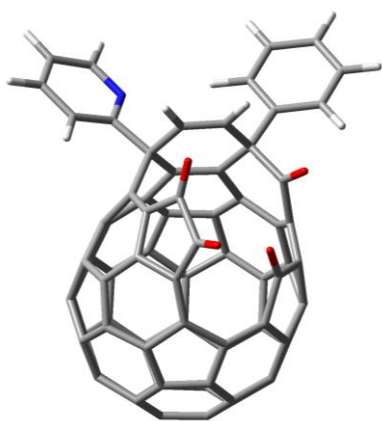

Standard orientation:

| Center Number | Atomic Number | Atomic Type | Coordinates (Angstroms) |           |           |
|---------------|---------------|-------------|-------------------------|-----------|-----------|
|               |               |             | X                       | Y         | Z         |
| 1             | 6             | 0           | -2.570674               | 1.255427  | -3.314933 |
| 2             | 6             | 0           | -1.118355               | 1.308106  | -3.351751 |
| 3             | 6             | 0           | -0.396209               | 0.134568  | -3.487815 |
| 4             | 6             | 0           | -1.076924               | -1.144962 | -3.584048 |
| 5             | 6             | 0           | -2.467944               | -1.203694 | -3.508511 |
| 6             | 6             | 0           | -3.231050               | 0.024732  | -3.369168 |
| 7             | 6             | 0           | -0.658339               | 2.329699  | -2.429765 |
| 8             | 6             | 0           | 0.813102                | -0.040205 | -2.728282 |
| 9             | 6             | 0           | -0.265170               | -2.108059 | -2.874662 |
| 10            | 6             | 0           | -3.101408               | -2.227661 | -2.694334 |
| 11            | 6             | 0           | -4.339021               | -0.239377 | -2.467039 |
| 12            | 6             | 0           | -3.022700               | 2.286505  | -2.405256 |
| 13            | 6             | 0           | -2.312715               | -3.155863 | -2.008233 |
| 14            | 6             | 0           | -0.864837               | -3.098814 | -2.106954 |
| 15            | 6             | 0           | -2.640564               | -3.513004 | -0.642124 |
| 16            | 6             | 0           | -0.294687               | -3.417991 | -0.816085 |
| 17            | 6             | 0           | 0.504211                | 2.153185  | -1.643965 |
| 18            | 6             | 0           | 0.914740                | -1.438764 | -2.372757 |
| 19            | 6             | 0           | -1.394682               | -3.675241 | 0.080624  |
| 20            | 6             | 0           | 1.530707                | -1.799693 | -1.177936 |
| 21            | 6             | 0           | 1.283744                | 0.936081  | -1.841899 |
| 22            | 6             | 0           | -4.248721               | -1.626139 | -2.038252 |
| 23            | 6             | 0           | -4.762480               | 0.744991  | -1.571971 |
| 24            | 6             | 0           | 0.550705                | 2.748475  | -0.297525 |
| 25            | 6             | 0           | -4.107731               | 2.042268  | -1.552671 |
| 26            | 6             | 0           | -1.849961               | 2.973986  | -1.902808 |
| 27            | 6             | 0           | -5.081063               | 0.388593  | -0.199410 |
| 28            | 6             | 0           | -4.062592               | 2.504110  | -0.181221 |
| 29            | 6             | 0           | -1.835596               | 3.467970  | -0.610966 |
| 30            | 6             | 0           | 0.886069                | -2.813776 | -0.342254 |
| 31            | 6             | 0           | -4.557064               | -1.966841 | -0.715981 |
| 32            | 6             | 0           | 2.216252                | 0.518029  | -0.820467 |
| 33            | 6             | 0           | -4.627429               | 1.461735  | 0.663110  |
| 34            | 6             | 0           | -2.969089               | 3.233568  | 0.272804  |
| 35            | 6             | 0           | -0.622554               | 3.375196  | 0.162425  |
| 36            | 6             | 0           | -1.017529               | 3.187262  | 1.527471  |
| 37            | 6             | 0           | 1.537509                | 2.284463  | 0.681866  |
| 38            | 6             | 0           | 2.367662                | -0.815421 | -0.525617 |
| 39            | 6             | 0           | 2.376671                | -2.143926 | 1.585838  |
| 40            | 6             | 0           | -2.429783               | 2.987614  | 1.591384  |
| 41            | 6             | 0           | -2.893701               | 1.915327  | 2.360429  |
| 42            | 6             | 0           | -2.009842               | 1.077670  | 3.159238  |
| 43            | 6             | 0           | -4.019894               | 1.156909  | 1.884497  |
| 44            | 6             | 0           | -3.730625               | -2.919952 | -0.005736 |
| 45            | 6             | 0           | 1.748194                | 1.673960  | 3.320948  |
| 46            | 6             | 0           | -4.961012               | -0.932448 | 0.225175  |
| 47            | 6             | 0           | -4.344203               | -1.229071 | 1.506875  |
| 48            | 6             | 0           | 1.176819                | 2.218387  | 2.029427  |
| 49            | 6             | 0           | 1.066145                | -2.659171 | 1.087811  |
| 50            | 6             | 0           | -0.051580               | -2.761295 | 1.914470  |
| 51            | 6             | 0           | -0.198807               | 2.487713  | 2.378476  |
| 52            | 6             | 0           | -0.700829               | 1.537531  | 3.345225  |
| 53            | 6             | 0           | -3.835654               | -0.207207 | 2.313876  |
| 54            | 6             | 0           | -2.567535               | -0.321732 | 3.046468  |
| 55            | 6             | 0           | 0.497138                | 1.263095  | 4.199781  |
| 56            | 6             | 0           | -3.604699               | -2.452186 | 1.368230  |
| 57            | 6             | 0           | -1.284722               | -3.232288 | 1.394897  |
| 58            | 6             | 0           | -0.386813               | -1.790801 | 3.038862  |
| 59            | 6             | 0           | -2.397945               | -2.561275 | 2.041912  |
| 60            | 6             | 0           | -1.881227               | -1.536843 | 2.920208  |
| 61            | 6             | 0           | 2.791560                | 1.619798  | 0.069777  |
| 62            | 6             | 0           | 3.249004                | -1.330605 | 0.590327  |
| 63            | 6             | 0           | 3.921140                | -0.220735 | 1.356712  |
| 64            | 6             | 0           | 3.732815                | 1.071951  | 1.113503  |
| 65            | 6             | 0           | 4.351709                | -2.225718 | -0.032436 |
| 66            | 6             | 0           | 3.610946                | 2.607970  | -0.783906 |
| 67            | 8             | 0           | 2.768517                | -2.397186 | 2.707569  |
| 68            | 8             | 0           | 2.877991                | 1.658459  | 3.743304  |
| 69            | 6             | 0           | 3.667703                | 3.973030  | -0.487965 |
| 70            | 6             | 0           | 4.486826                | 4.792798  | -1.263230 |
| 71            | 6             | 0           | 5.219354                | 4.223320  | -2.303372 |
| 72            | 6             | 0           | 5.101863                | 2.848275  | -2.513335 |
| 73            | 7             | 0           | 4.322177                | 2.052172  | -1.774852 |
| 74            | 6             | 0           | 5.097206                | -1.689057 | -1.093703 |
| 75            | 6             | 0           | 6.110964                | -2.436146 | -1.688934 |
| 76            | 6             | 0           | 6.396711                | -3.726017 | -1.232631 |
| 77            | 6             | 0           | 5.666224                | -4.256478 | -0.170700 |
| 78            | 6             | 0           | 4.649109                | -3.509995 | 0.431539  |
| 79            | 8             | 0           | 0.392303                | -1.201116 | 3.752718  |
| 80            | 8             | 0           | 0.543410                | 1.041288  | 5.382655  |
| 81            | 1             | 0           | 4.581022                | -0.541943 | 2.155097  |
| 82            | 1             | 0           | 4.244788                | 1.813256  | 1.715928  |
| 83            | 1             | 0           | 3.080482                | 4.381917  | 0.327797  |
| 84            | 1             | 0           | 4.548841                | 5.857886  | -1.057559 |
| 85            | 1             | 0           | 5.866894                | 4.823178  | -2.935277 |
| 86            | 1             | 0           | 5.659551                | 2.360563  | -3.310787 |
| 87            | 1             | 0           | 4.884031                | -0.681534 | -1.443719 |
| 88            | 1             | 0           | 6.680743                | -2.008685 | -2.509858 |
| 89            | 1             | 0           | 7.186701                | -4.309067 | -1.698275 |
| 90            | 1             | 0           | 5.885679                | -5.254499 | 0.199172  |
| 91            | 1             | 0           | 4.107192                | -3.932920 | 1.270019  |

The total electronic energy was calculated to be -3220.1735974 Hartree.



**Table S5.** Optimized structure of INT1c (B3LYP-D3/6-31G(d))

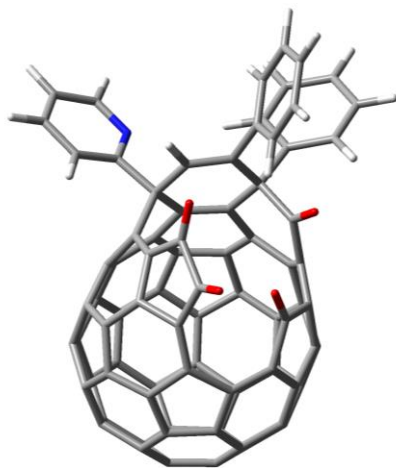

Standard orientation:

| Center Number | Atomic Number | Atomic Type | Coordinates (Angstroms) |           |           |
|---------------|---------------|-------------|-------------------------|-----------|-----------|
|               |               |             | X                       | Y         | Z         |
| 1             | 6             | 0           | -3.736453               | 1.784894  | -2.525682 |
| 2             | 6             | 0           | -2.325163               | 2.007726  | -2.791417 |
| 3             | 6             | 0           | -1.565360               | 0.989953  | -3.343149 |
| 4             | 6             | 0           | -2.164419               | -0.297711 | -3.647136 |
| 5             | 6             | 0           | -3.508428               | -0.529218 | -3.355223 |
| 6             | 6             | 0           | -4.310834               | 0.536453  | -2.779971 |
| 7             | 6             | 0           | -1.767304               | 2.824457  | -1.730030 |
| 8             | 6             | 0           | -0.225156               | 0.775335  | -2.867377 |
| 9             | 6             | 0           | -1.168879               | -1.304913 | -3.356078 |
| 10            | 6             | 0           | -3.904277               | -1.782088 | -2.733639 |
| 11            | 6             | 0           | -5.205480               | -0.057937 | -1.801193 |
| 12            | 6             | 0           | -4.074846               | 2.512884  | -1.321135 |
| 13            | 6             | 0           | -2.938620               | -2.752833 | -2.452152 |
| 14            | 6             | 0           | -1.543926               | -2.512072 | -2.778865 |
| 15            | 6             | 0           | -2.971557               | -3.457663 | -1.185559 |
| 16            | 6             | 0           | -0.715546               | -3.064781 | -1.730039 |
| 17            | 6             | 0           | -0.468458               | 2.593662  | -1.220119 |
| 18            | 6             | 0           | 0.039103                | -0.646669 | -2.907772 |
| 19            | 6             | 0           | -1.601608               | -3.646410 | -0.751740 |
| 20            | 6             | 0           | 0.897180                | -1.211443 | -1.969238 |
| 21            | 6             | 0           | 0.336194                | 1.552650  | -1.848557 |
| 22            | 6             | 0           | -4.941975               | -1.487595 | -1.761469 |
| 23            | 6             | 0           | -5.514682               | 0.631403  | -0.627003 |
| 24            | 6             | 0           | -0.205261               | 2.854568  | 0.205035  |
| 25            | 6             | 0           | -4.958479               | 1.952723  | -0.388894 |
| 26            | 6             | 0           | -2.876806               | 3.188637  | -0.864706 |
| 27            | 6             | 0           | -5.539669               | -0.074474 | 0.642910  |
| 28            | 6             | 0           | -4.684155               | 2.077749  | 1.027302  |
| 29            | 6             | 0           | -2.649713               | 3.360329  | 0.488853  |
| 30            | 6             | 0           | 0.492123                | -2.461728 | -1.328926 |
| 31            | 6             | 0           | -4.965956               | -2.165230 | -0.536428 |
| 32            | 6             | 0           | 1.471616                | 1.007934  | -1.138489 |
| 33            | 6             | 0           | -5.004348               | 0.807332  | 1.661321  |
| 34            | 6             | 0           | -3.576656               | 2.798055  | 1.461757  |
| 35            | 6             | 0           | -1.308211               | 3.222478  | 0.998757  |
| 36            | 6             | 0           | -1.423676               | 2.677182  | 2.319172  |
| 37            | 6             | 0           | 0.977108                | 2.281887  | 0.854801  |

|    |   |   |           |           |           |
|----|---|---|-----------|-----------|-----------|
| 38 | 6 | 0 | 1.777471  | -0.325825 | -1.230846 |
| 39 | 6 | 0 | 2.283264  | -2.107325 | 0.421325  |
| 40 | 6 | 0 | -2.781162 | 2.310136  | 2.565915  |
| 41 | 6 | 0 | -3.014938 | 1.040337  | 3.104226  |
| 42 | 6 | 0 | -1.938502 | 0.143258  | 3.503390  |
| 43 | 6 | 0 | -4.154850 | 0.292438  | 2.644979  |
| 44 | 6 | 0 | -3.955134 | -3.159690 | -0.243110 |
| 45 | 6 | 0 | 1.726947  | 1.106964  | 3.172910  |
| 46 | 6 | 0 | -5.249803 | -1.436217 | 0.690828  |
| 47 | 6 | 0 | -4.378929 | -1.956057 | 1.730921  |
| 48 | 6 | 0 | 0.883903  | 1.869789  | 2.183791  |
| 49 | 6 | 0 | 0.931948  | -2.621533 | 0.039614  |
| 50 | 6 | 0 | 0.005900  | -3.037476 | 0.993955  |
| 51 | 6 | 0 | -0.412739 | 1.895680  | 2.818794  |
| 52 | 6 | 0 | -0.653550 | 0.692691  | 3.583412  |
| 53 | 6 | 0 | -3.796456 | -1.104054 | 2.673404  |
| 54 | 6 | 0 | -2.406195 | -1.241990 | 3.126895  |
| 55 | 6 | 0 | 0.703645  | 0.355789  | 4.119206  |
| 56 | 6 | 0 | -3.597495 | -3.018610 | 1.162412  |
| 57 | 6 | 0 | -1.269098 | -3.512468 | 0.592701  |
| 58 | 6 | 0 | -0.170052 | -2.392333 | 2.359975  |
| 59 | 6 | 0 | -2.277898 | -3.142748 | 1.569087  |
| 60 | 6 | 0 | -1.671934 | -2.301363 | 2.576287  |
| 61 | 6 | 0 | 2.130375  | 1.916144  | -0.106290 |
| 62 | 6 | 0 | 2.910061  | -0.995704 | -0.473239 |
| 63 | 6 | 0 | 3.704930  | -0.015868 | 0.394104  |
| 64 | 6 | 0 | 3.313895  | 1.251667  | 0.553241  |
| 65 | 6 | 0 | 3.864139  | -1.629273 | -1.518423 |
| 66 | 6 | 0 | 2.702439  | 3.168366  | -0.805303 |
| 67 | 8 | 0 | 2.876605  | -2.604395 | 1.356595  |
| 68 | 8 | 0 | 2.917051  | 1.128217  | 3.373983  |
| 69 | 6 | 0 | 2.765786  | 4.407095  | -0.160311 |
| 70 | 6 | 0 | 3.364315  | 5.477071  | -0.823665 |
| 71 | 6 | 0 | 3.878006  | 5.273667  | -2.103516 |
| 72 | 6 | 0 | 3.772408  | 3.997378  | -2.658712 |
| 73 | 7 | 0 | 3.203388  | 2.963017  | -2.030956 |
| 74 | 6 | 0 | 4.218158  | -0.856034 | -2.634957 |
| 75 | 6 | 0 | 5.115845  | -1.350953 | -3.578531 |
| 76 | 6 | 0 | 5.671606  | -2.623512 | -3.421266 |
| 77 | 6 | 0 | 5.330499  | -3.388636 | -2.307151 |
| 78 | 6 | 0 | 4.434578  | -2.894043 | -1.355875 |
| 79 | 8 | 0 | 0.691807  | -1.880540 | 3.039918  |
| 80 | 8 | 0 | 0.997349  | -0.140492 | 5.176794  |
| 81 | 6 | 0 | 6.262328  | -1.257646 | 2.926858  |
| 82 | 6 | 0 | 5.043930  | -0.895798 | 2.352713  |
| 83 | 6 | 0 | 4.991857  | -0.460921 | 1.021635  |
| 84 | 6 | 0 | 6.182030  | -0.388605 | 0.282822  |
| 85 | 6 | 0 | 7.398856  | -0.756309 | 0.857847  |
| 86 | 6 | 0 | 7.441818  | -1.193750 | 2.182319  |
| 87 | 1 | 0 | 3.911597  | 1.901462  | 1.182803  |
| 88 | 1 | 0 | 2.353653  | 4.527423  | 0.836364  |
| 89 | 1 | 0 | 3.426633  | 6.451799  | -0.347667 |
| 90 | 1 | 0 | 4.350167  | 6.078076  | -2.658883 |
| 91 | 1 | 0 | 4.163099  | 3.793012  | -3.653915 |
| 92 | 1 | 0 | 3.809015  | 0.145085  | -2.746853 |
| 93 | 1 | 0 | 5.384162  | -0.739275 | -4.435959 |
| 94 | 1 | 0 | 6.370533  | -3.010242 | -4.158007 |
| 95 | 1 | 0 | 5.767411  | -4.373496 | -2.166175 |
| 96 | 1 | 0 | 4.209577  | -3.488930 | -0.478256 |
| 97 | 1 | 0 | 6.286553  | -1.590595 | 3.961039  |

|     |   |   |          |           |           |                                                                         |   |   |          |           |          |
|-----|---|---|----------|-----------|-----------|-------------------------------------------------------------------------|---|---|----------|-----------|----------|
| 98  | 1 | 0 | 4.132776 | -0.950334 | 2.934017  | 101                                                                     | 1 | 0 | 8.388983 | -1.479341 | 2.633127 |
| 99  | 1 | 0 | 6.150475 | -0.047075 | -0.747154 | -----                                                                   |   |   |          |           |          |
| 100 | 1 | 0 | 8.311410 | -0.696560 | 0.270129  | The total electronic energy was calculated to be -3451.2397105 Hartree. |   |   |          |           |          |

**Table S6.** Optimized structure of INT1d (B3LYP-D3/6-31G(d))

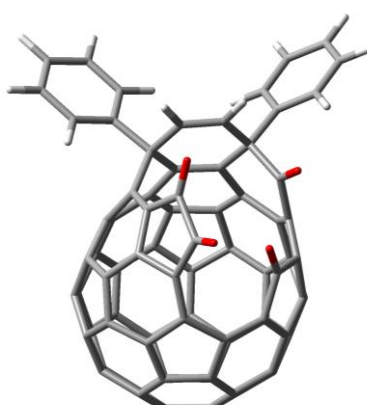

Standard orientation:

| Center Number | Atomic Number | Atomic Type | Coordinates (Angstroms) |           |           |
|---------------|---------------|-------------|-------------------------|-----------|-----------|
|               |               |             | X                       | Y         | Z         |
| 1             | 6             | 0           | 3.985309                | -0.262778 | 1.213529  |
| 2             | 6             | 0           | 3.772566                | 1.042078  | 1.076406  |
| 3             | 6             | 0           | 2.795823                | 1.659733  | 0.106792  |
| 4             | 6             | 0           | 1.537667                | 2.238179  | 0.798397  |
| 5             | 6             | 0           | 1.202433                | 2.057790  | 2.141065  |
| 6             | 6             | 0           | 1.804623                | 1.413093  | 3.369633  |
| 7             | 6             | 0           | 0.574663                | 0.939513  | 4.246890  |
| 8             | 6             | 0           | -0.645647               | 1.265897  | 3.441141  |
| 9             | 6             | 0           | -1.958693               | 0.816387  | 3.252839  |
| 10            | 6             | 0           | -2.514624               | -0.574212 | 3.051068  |
| 11            | 6             | 0           | -1.825689               | -1.772114 | 2.826017  |
| 12            | 6             | 0           | -0.330687               | -2.029293 | 2.918898  |
| 13            | 6             | 0           | 0.004449                | -2.882402 | 1.699602  |
| 14            | 6             | 0           | 1.105336                | -2.696510 | 0.863473  |
| 15            | 6             | 0           | 2.404131                | -2.174720 | 1.382481  |
| 16            | 6             | 0           | 3.279496                | -1.326408 | 0.408769  |
| 17            | 6             | 0           | 5.014208                | -3.218167 | 0.540026  |
| 18            | 8             | 0           | 2.945394                | 1.354439  | 3.756780  |
| 19            | 8             | 0           | 2.787186                | -2.437836 | 2.505121  |
| 20            | 6             | 0           | 3.532905                | 4.089987  | -0.274820 |
| 21            | 6             | 0           | 2.378859                | -0.739109 | -0.652356 |
| 22            | 6             | 0           | 1.246019                | 1.092525  | -1.813946 |
| 23            | 8             | 0           | 0.648776                | 0.640086  | 5.410996  |
| 24            | 6             | 0           | 1.524705                | -1.679493 | -1.348364 |
| 25            | 6             | 0           | 0.526157                | 2.767824  | -0.121426 |
| 26            | 8             | 0           | 0.436880                | -1.523816 | 3.704200  |
| 27            | 6             | 0           | -0.721454               | 2.502328  | -2.255393 |
| 28            | 6             | 0           | 4.292418                | 5.047339  | -0.950516 |
| 29            | 6             | 0           | -1.907859               | 3.092223  | -1.658248 |
| 30            | 6             | 0           | 3.563502                | 2.749401  | -0.671502 |
| 31            | 6             | 0           | 0.458236                | 2.280961  | -1.508594 |
| 32            | 6             | 0           | 0.764987                | 0.177829  | -2.758050 |
| 33            | 6             | 0           | 2.208470                | 0.613105  | -0.845716 |
| 34            | 6             | 0           | -1.871320               | 3.484807  | -0.332534 |
| 35            | 6             | 0           | -0.460745               | 0.394376  | -3.480426 |
| 36            | 6             | 0           | -1.008798               | 3.045906  | 1.761387  |
| 37            | 6             | 0           | -1.190784               | 1.546461  | -3.241504 |
| 38            | 6             | 0           | 0.884496                | -1.241746 | -2.504095 |
| 39            | 6             | 0           | 0.903438                | -2.752640 | -0.571893 |
| 40            | 6             | 0           | -0.642685               | 3.343362  | 0.408071  |
| 41            | 6             | 0           | 4.741880                | -2.070937 | -1.563029 |
| 42            | 6             | 0           | 4.353426                | -2.250609 | -0.228542 |
| 43            | 6             | 0           | -4.082294               | 2.472217  | 0.064693  |
| 44            | 6             | 0           | -0.277576               | -3.336367 | -1.069838 |
| 45            | 6             | 0           | -0.298077               | -1.884884 | -3.031791 |
| 46            | 6             | 0           | 5.753658                | -2.851463 | -2.122014 |
| 47            | 6             | 0           | -0.168431               | 2.287671  | 2.537684  |
| 48            | 6             | 0           | -2.641387               | 1.476269  | -3.181029 |
| 49            | 6             | 0           | 5.095629                | 4.673829  | -2.028082 |
| 50            | 6             | 0           | -4.624189               | 1.365124  | 0.838570  |
| 51            | 6             | 0           | -3.291144               | 0.246064  | -3.313848 |
| 52            | 6             | 0           | -2.418272               | 2.832905  | 1.837853  |
| 53            | 6             | 0           | 6.397655                | -3.822759 | -1.354513 |
| 54            | 6             | 0           | 4.386038                | 2.379278  | -1.742809 |
| 55            | 6             | 0           | -2.862501               | 1.704536  | 2.535215  |
| 56            | 6             | 0           | 6.025849                | -3.998787 | -0.021274 |
| 57            | 6             | 0           | -1.131536               | -0.881922 | -3.655394 |
| 58            | 6             | 0           | -5.085580               | 0.355440  | -0.093567 |
| 59            | 6             | 0           | -4.309024               | -1.378875 | 1.475475  |
| 60            | 6             | 0           | -2.985252               | 3.174038  | 0.552412  |
| 61            | 6             | 0           | -1.358926               | -3.673571 | -0.177407 |
| 62            | 6             | 0           | -3.084285               | 2.432409  | -2.188613 |
| 63            | 6             | 0           | -4.380010               | -0.095349 | -2.414431 |
| 64            | 6             | 0           | -3.993396               | 0.975664  | 2.023726  |
| 65            | 6             | 0           | 5.142785                | 3.333853  | -2.419928 |
| 66            | 6             | 0           | -1.231655               | -3.330836 | 1.164364  |
| 67            | 6             | 0           | -3.794031               | -0.415090 | 2.347764  |
| 68            | 6             | 0           | -4.794708               | 0.815835  | -1.440984 |
| 69            | 6             | 0           | -4.150551               | 2.114617  | -1.336685 |
| 70            | 6             | 0           | -2.344124               | -2.729459 | 1.878111  |
| 71            | 6             | 0           | -2.520240               | -0.960768 | -3.557947 |
| 72            | 6             | 0           | -3.128793               | -2.048152 | -2.809527 |
| 73            | 6             | 0           | -0.873679               | -2.933616 | -2.325529 |
| 74            | 6             | 0           | -4.552124               | -1.949896 | -0.793205 |
| 75            | 6             | 0           | -2.318904               | -3.015200 | -2.207008 |
| 76            | 6             | 0           | -2.619022               | -3.475524 | -0.865791 |
| 77            | 6             | 0           | -3.562242               | -2.581556 | 1.233010  |
| 78            | 6             | 0           | -4.948293               | -0.992603 | 0.229202  |
| 79            | 6             | 0           | -3.705089               | -2.945152 | -0.170061 |
| 80            | 6             | 0           | -4.269834               | -1.508765 | -2.091246 |
| 81            | 1             | 0           | 4.683779                | -0.627970 | 1.958189  |
| 82            | 1             | 0           | 4.303664                | 1.743143  | 1.709354  |
| 83            | 1             | 0           | 4.742874                | -3.360855 | 1.580333  |
| 84            | 1             | 0           | 2.912013                | 4.391747  | 0.563551  |
| 85            | 1             | 0           | 4.253599                | 6.085510  | -0.631857 |
| 86            | 1             | 0           | 4.253567                | -1.317582 | -2.172983 |
| 87            | 1             | 0           | 6.037974                | -2.696642 | -3.159471 |
| 88            | 1             | 0           | 5.683933                | 5.419058  | -2.556267 |
| 89            | 1             | 0           | 7.183986                | -4.433054 | -1.790077 |
| 90            | 1             | 0           | 4.438247                | 1.335851  | -2.041618 |
| 91            | 1             | 0           | 6.522820                | -4.747155 | 0.590097  |
| 92            | 1             | 0           | 5.771680                | 3.030244  | -3.252554 |

-----

The total electronic energy was calculated to be -3204.1341752 Hartree.

**Table S7.** Optimized structure of INT1e (B3LYP-D3/6-31G(d))

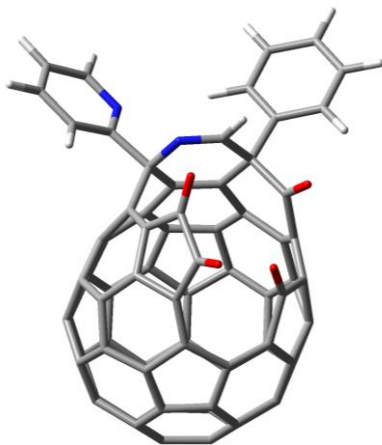

Standard orientation:

| Center Number | Atomic Number | Atomic Type | Coordinates (Angstroms) |           |           |
|---------------|---------------|-------------|-------------------------|-----------|-----------|
|               |               |             | X                       | Y         | Z         |
| 1             | 6             | 0           | -2.619027               | 1.357917  | -3.262014 |
| 2             | 6             | 0           | -1.167090               | 1.391988  | -3.323494 |
| 3             | 6             | 0           | -0.463882               | 0.212907  | -3.505834 |
| 4             | 6             | 0           | -1.163672               | -1.054848 | -3.619722 |
| 5             | 6             | 0           | -2.553528               | -1.096740 | -3.519207 |
| 6             | 6             | 0           | -3.297074               | 0.137837  | -3.335915 |
| 7             | 6             | 0           | -0.677820               | 2.383574  | -2.382699 |
| 8             | 6             | 0           | 0.757365                | 0.003243  | -2.774979 |
| 9             | 6             | 0           | -0.352541               | -2.045449 | -2.948019 |
| 10            | 6             | 0           | -3.186141               | -2.131949 | -2.718753 |
| 11            | 6             | 0           | -4.393402               | -0.134126 | -2.422199 |
| 12            | 6             | 0           | -3.041312               | 2.371385  | -2.318680 |
| 13            | 6             | 0           | -2.398112               | -3.086286 | -2.068603 |
| 14            | 6             | 0           | -0.951451               | -3.044995 | -2.190982 |
| 15            | 6             | 0           | -2.707925               | -3.471936 | -0.706189 |
| 16            | 6             | 0           | -0.363905               | -3.400356 | -0.916665 |
| 17            | 6             | 0           | 0.495048                | 2.170931  | -1.622383 |
| 18            | 6             | 0           | 0.846425                | -1.405254 | -2.454011 |
| 19            | 6             | 0           | -1.452228               | -3.664615 | -0.008362 |
| 20            | 6             | 0           | 1.479270                | -1.805470 | -1.279458 |
| 21            | 6             | 0           | 1.254605                | 0.953100  | -1.874075 |
| 22            | 6             | 0           | -4.314387               | -1.532037 | -2.029070 |
| 23            | 6             | 0           | -4.788976               | 0.833158  | -1.496197 |
| 24            | 6             | 0           | 0.573070                | 2.721777  | -0.257076 |
| 25            | 6             | 0           | -4.115647               | 2.120530  | -1.454887 |
| 26            | 6             | 0           | -1.850772               | 3.028943  | -1.818149 |
| 27            | 6             | 0           | -5.091036               | 0.446943  | -0.128005 |
| 28            | 6             | 0           | -4.041858               | 2.547038  | -0.073268 |
| 29            | 6             | 0           | -1.806450               | 3.486693  | -0.513799 |
| 30            | 6             | 0           | 0.832651                | -2.822005 | -0.449297 |
| 31            | 6             | 0           | -4.605861               | -1.901242 | -0.710795 |
| 32            | 6             | 0           | 2.194289                | 0.495254  | -0.882220 |
| 33            | 6             | 0           | -4.610145               | 1.492429  | 0.753483  |
| 34            | 6             | 0           | -2.929555               | 3.247637  | 0.381561  |
| 35            | 6             | 0           | -0.582830               | 3.354067  | 0.237827  |

|    |   |   |           |           |           |
|----|---|---|-----------|-----------|-----------|
| 36 | 6 | 0 | -0.958749 | 3.138005  | 1.603544  |
| 37 | 6 | 0 | 1.561756  | 2.212359  | 0.697879  |
| 38 | 6 | 0 | 2.332755  | -0.843294 | -0.622491 |
| 39 | 6 | 0 | 2.354121  | -2.192519 | 1.475242  |
| 40 | 6 | 0 | -2.373975 | 2.961688  | 1.685005  |
| 41 | 6 | 0 | -2.846578 | 1.880666  | 2.436034  |
| 42 | 6 | 0 | -1.965283 | 1.012328  | 3.202347  |
| 43 | 6 | 0 | -3.990331 | 1.149688  | 1.958432  |
| 44 | 6 | 0 | -3.780136 | -2.881495 | -0.037819 |
| 45 | 6 | 0 | 1.804251  | 1.508303  | 3.323008  |
| 46 | 6 | 0 | -4.982064 | -0.885800 | 0.261825  |
| 47 | 6 | 0 | -4.350378 | -1.222306 | 1.526209  |
| 48 | 6 | 0 | 1.227708  | 2.114657  | 2.051524  |
| 49 | 6 | 0 | 1.035739  | -2.694241 | 0.981529  |
| 50 | 6 | 0 | -0.069912 | -2.807962 | 1.823680  |
| 51 | 6 | 0 | -0.137792 | 2.406152  | 2.426056  |
| 52 | 6 | 0 | -0.647279 | 1.446459  | 3.379489  |
| 53 | 6 | 0 | -3.818292 | -0.227368 | 2.351304  |
| 54 | 6 | 0 | -2.541677 | -0.376145 | 3.062638  |
| 55 | 6 | 0 | 0.552670  | 1.127944  | 4.212402  |
| 56 | 6 | 0 | -3.627539 | -2.450107 | 1.345251  |
| 57 | 6 | 0 | -1.315841 | -3.255319 | 1.314243  |
| 58 | 6 | 0 | -0.378649 | -1.867972 | 2.981942  |
| 59 | 6 | 0 | -2.411744 | -2.589904 | 1.996530  |
| 60 | 6 | 0 | -1.871099 | -1.595109 | 2.893982  |
| 61 | 6 | 0 | 2.793828  | 1.541367  | 0.053529  |
| 62 | 6 | 0 | 3.207499  | -1.350400 | 0.492316  |
| 63 | 6 | 0 | 3.833130  | -0.205793 | 1.280258  |
| 64 | 7 | 0 | 3.682332  | 1.037577  | 1.089753  |
| 65 | 6 | 0 | 4.376947  | -2.176304 | -0.098021 |
| 66 | 6 | 0 | 3.650571  | 2.543765  | -0.743062 |
| 67 | 8 | 0 | 2.764136  | -2.467382 | 2.585969  |
| 68 | 8 | 0 | 2.934503  | 1.411288  | 3.724715  |
| 69 | 6 | 0 | 3.854062  | 3.847285  | -0.283318 |
| 70 | 6 | 0 | 4.695214  | 4.684681  | -1.011666 |
| 71 | 6 | 0 | 5.305277  | 4.189089  | -2.164744 |
| 72 | 6 | 0 | 5.049495  | 2.867893  | -2.530285 |
| 73 | 7 | 0 | 4.240910  | 2.055010  | -1.838978 |
| 74 | 6 | 0 | 5.082763  | -1.620860 | -1.177056 |
| 75 | 6 | 0 | 6.156692  | -2.306427 | -1.741131 |
| 76 | 6 | 0 | 6.541466  | -3.550932 | -1.236559 |
| 77 | 6 | 0 | 5.850938  | -4.097655 | -0.155668 |
| 78 | 6 | 0 | 4.776153  | -3.413188 | 0.417719  |
| 79 | 8 | 0 | 0.418418  | -1.312055 | 3.702930  |
| 80 | 8 | 0 | 0.603582  | 0.886850  | 5.391629  |
| 81 | 1 | 0 | 4.478462  | -0.516158 | 2.101524  |
| 82 | 1 | 0 | 3.369288  | 4.186045  | 0.626085  |
| 83 | 1 | 0 | 4.873704  | 5.704905  | -0.683577 |
| 84 | 1 | 0 | 5.966836  | 4.806673  | -2.764381 |
| 85 | 1 | 0 | 5.511967  | 2.437905  | -3.416691 |
| 86 | 1 | 0 | 4.795347  | -0.647747 | -1.568346 |
| 87 | 1 | 0 | 6.694913  | -1.864679 | -2.575474 |
| 88 | 1 | 0 | 7.377418  | -4.086214 | -1.678526 |
| 89 | 1 | 0 | 6.147249  | -5.060519 | 0.251600  |
| 90 | 1 | 0 | 4.266124  | -3.845568 | 1.270639  |

The total electronic energy was calculated to be  $-3236.2105932$  Hartree.

**Table S8.** Optimized structure of INT1f (B3LYP-D3/6-31G(d))

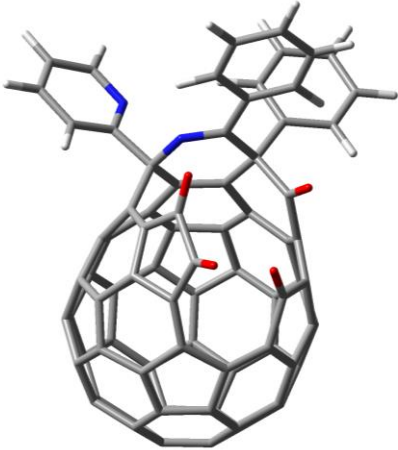

Standard orientation:

| Center Number | Atomic Number | Atomic Type | Coordinates (Angstroms) |           |           |
|---------------|---------------|-------------|-------------------------|-----------|-----------|
|               |               |             | X                       | Y         | Z         |
| 1             | 6             | 0           | -3.690557               | 1.119115  | -2.925423 |
| 2             | 6             | 0           | -2.276658               | 1.196985  | -3.252778 |
| 3             | 6             | 0           | -1.567681               | 0.032425  | -3.499608 |
| 4             | 6             | 0           | -2.221232               | -1.261912 | -3.415266 |
| 5             | 6             | 0           | -3.567665               | -1.343156 | -3.061541 |
| 6             | 6             | 0           | -4.317912               | -0.124627 | -2.810829 |
| 7             | 6             | 0           | -1.668617               | 2.256938  | -2.469247 |
| 8             | 6             | 0           | -0.226945               | -0.093333 | -2.995553 |
| 9             | 6             | 0           | -1.260387               | -2.182883 | -2.849669 |
| 10            | 6             | 0           | -4.001972               | -2.348565 | -2.105820 |
| 11            | 6             | 0           | -5.220038               | -0.377233 | -1.700207 |
| 12            | 6             | 0           | -3.978619               | 2.172634  | -1.975186 |
| 13            | 6             | 0           | -3.069557               | -3.235331 | -1.559656 |
| 14            | 6             | 0           | -1.671460               | -3.154222 | -1.945151 |
| 15            | 6             | 0           | -3.113136               | -3.548378 | -0.145026 |
| 16            | 6             | 0           | -0.850871               | -3.411069 | -0.781102 |
| 17            | 6             | 0           | -0.370355               | 2.125812  | -1.924856 |
| 18            | 6             | 0           | -0.020099               | -1.475552 | -2.617934 |
| 19            | 6             | 0           | -1.745502               | -3.655231 | 0.322669  |
| 20            | 6             | 0           | 0.827507                | -1.780655 | -1.555895 |
| 21            | 6             | 0           | 0.382445                | 0.921931  | -2.249928 |
| 22            | 6             | 0           | -5.013365               | -1.746099 | -1.255351 |
| 23            | 6             | 0           | -5.482238               | 0.629893  | -0.769494 |
| 24            | 6             | 0           | -0.072129               | 2.753653  | -0.625260 |
| 25            | 6             | 0           | -4.868743               | 1.939092  | -0.918734 |
| 26            | 6             | 0           | -2.746641               | 2.896762  | -1.734509 |
| 27            | 6             | 0           | -5.518513               | 0.316042  | 0.648526  |
| 28            | 6             | 0           | -4.566234               | 2.448233  | 0.402473  |
| 29            | 6             | 0           | -2.487702               | 3.430237  | -0.484630 |
| 30            | 6             | 0           | 0.381083                | -2.762117 | -0.570492 |
| 31            | 6             | 0           | -5.049009               | -2.046357 | 0.111710  |
| 32            | 6             | 0           | 1.501739                | 0.553385  | -1.421386 |
| 33            | 6             | 0           | -4.932046               | 1.426534  | 1.372347  |
| 34            | 6             | 0           | -3.420958               | 3.209440  | 0.611486  |
| 35            | 6             | 0           | -1.144670               | 3.378030  | 0.038296  |
| 36            | 6             | 0           | -1.260020               | 3.230794  | 1.459008  |
| 37            | 6             | 0           | 1.090208                | 2.327032  | 0.160067  |
| 38            | 6             | 0           | 1.748914                | -0.755384 | -1.115046 |
| 39            | 6             | 0           | 2.193259                | -1.953169 | 1.015556  |
| 40            | 6             | 0           | -2.628967               | 3.017746  | 1.805826  |
| 41            | 6             | 0           | -2.913810               | 1.969361  | 2.686725  |
| 42            | 6             | 0           | -1.874103               | 1.175940  | 3.326560  |
| 43            | 6             | 0           | -4.093353               | 1.175880  | 2.461877  |
| 44            | 6             | 0           | -4.074253               | -2.957336 | 0.674463  |
| 45            | 6             | 0           | 1.833660                | 1.790425  | 2.716842  |
| 46            | 6             | 0           | -5.287266               | -0.987573 | 1.082038  |
| 47            | 6             | 0           | -4.426495               | -1.228230 | 2.227524  |
| 48            | 6             | 0           | 1.008250                | 2.301147  | 1.552133  |
| 49            | 6             | 0           | 0.830516                | -2.531043 | 0.787604  |
| 50            | 6             | 0           | -0.096866               | -2.637902 | 1.823986  |
| 51            | 6             | 0           | -0.275989               | 2.573773  | 2.156034  |
| 52            | 6             | 0           | -0.563028               | 1.657905  | 3.236480  |
| 53            | 6             | 0           | -3.797405               | -0.169270 | 2.888888  |
| 54            | 6             | 0           | -2.410765               | -0.234912 | 3.367366  |
| 55            | 6             | 0           | 0.785346                | 1.425732  | 3.846297  |
| 56            | 6             | 0           | -3.696179               | -2.440848 | 1.982983  |
| 57            | 6             | 0           | -1.392025               | -3.162921 | 1.574429  |
| 58            | 6             | 0           | -0.237407               | -1.656550 | 2.981691  |
| 59            | 6             | 0           | -2.378525               | -2.501008 | 2.410020  |
| 60            | 6             | 0           | -1.731795               | -1.439408 | 3.144421  |
| 61            | 6             | 0           | 2.211860                | 1.658935  | -0.660057 |
| 62            | 6             | 0           | 2.859015                | -1.192438 | -0.176347 |
| 63            | 6             | 0           | 3.668809                | 0.019516  | 0.358490  |
| 64            | 7             | 0           | 3.312337                | 1.233099  | 0.165895  |
| 65            | 6             | 0           | 3.753201                | -2.123540 | -1.028514 |
| 66            | 6             | 0           | 2.866323                | 2.651810  | -1.647827 |
| 67            | 8             | 0           | 2.756401                | -2.121638 | 2.076607  |
| 68            | 8             | 0           | 3.023175                | 1.767984  | 2.901224  |
| 69            | 6             | 0           | 3.011507                | 4.006437  | -1.339309 |
| 70            | 6             | 0           | 6.82147                 | 4.826002  | -2.244381 |
| 71            | 6             | 0           | 4.185943                | 4.263858  | -3.417564 |
| 72            | 6             | 0           | 4.000594                | 2.896976  | -3.625224 |
| 73            | 7             | 0           | 3.357333                | 2.100782  | -2.763115 |
| 74            | 6             | 0           | 3.828194                | -3.504932 | -0.826726 |
| 75            | 6             | 0           | 4.615098                | -4.297279 | -1.665135 |
| 76            | 6             | 0           | 5.329085                | -3.717502 | -2.713717 |
| 77            | 6             | 0           | 5.247341                | -2.328833 | -2.924183 |
| 78            | 6             | 0           | 4.460039                | -1.545770 | -2.091934 |
| 79            | 8             | 0           | 0.643631                | -1.046288 | 3.542055  |
| 80            | 8             | 0           | 1.063621                | 1.266287  | 5.007259  |
| 81            | 6             | 0           | 6.726078                | -1.508968 | 2.096537  |
| 82            | 6             | 0           | 5.509121                | -1.418339 | 1.423016  |
| 83            | 6             | 0           | 4.947789                | -0.169373 | 1.113278  |
| 84            | 6             | 0           | 5.648730                | 0.986365  | 1.510907  |
| 85            | 6             | 0           | 6.859497                | 0.894498  | 2.186562  |
| 86            | 6             | 0           | 7.408811                | -0.356026 | 2.480777  |
| 87            | 1             | 0           | 2.612496                | 4.401557  | -0.411286 |
| 88            | 1             | 0           | 3.810497                | 5.884628  | -2.036088 |
| 89            | 1             | 0           | 4.713111                | 4.865064  | -4.151897 |
| 90            | 1             | 0           | 4.384655                | 2.415192  | -4.522465 |
| 91            | 1             | 0           | 3.293835                | -3.971276 | -0.004466 |
| 92            | 1             | 0           | 4.669389                | -5.368724 | -1.492657 |
| 93            | 1             | 0           | 5.942995                | -4.334819 | -3.363690 |
| 94            | 1             | 0           | 5.795763                | -1.877795 | -3.741152 |
| 95            | 1             | 0           | 4.376643                | -0.476865 | -2.274471 |
| 96            | 1             | 0           | 7.135685                | -2.489481 | 2.323444  |
| 97            | 1             | 0           | 5.003732                | -2.332078 | 1.154687  |

|     |   |   |          |           |          |
|-----|---|---|----------|-----------|----------|
| 98  | 1 | 0 | 5.213299 | 1.951922  | 1.291058 |
| 99  | 1 | 0 | 7.374812 | 1.802475  | 2.488260 |
| 100 | 1 | 0 | 8.356706 | -0.429767 | 3.007724 |

The total electronic energy was calculated to be -3467.2768334 Hartree.

**Table S9.** Optimized structure of INT3a (B3LYP-D3/6-31G(d))

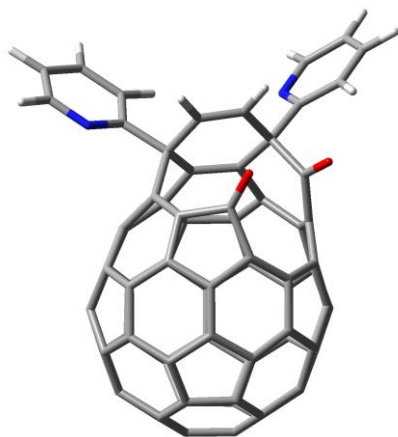

Standard orientation:

| Center Number | Atomic Number | Atomic Type | Coordinates (Angstroms) |           |           |
|---------------|---------------|-------------|-------------------------|-----------|-----------|
|               |               |             | X                       | Y         | Z         |
| 1             | 6             | 0           | 1.475033                | 2.088672  | 1.150925  |
| 2             | 6             | 0           | 1.005758                | 1.578195  | 2.351995  |
| 3             | 6             | 0           | 1.354924                | 0.293110  | 3.118020  |
| 4             | 6             | 0           | 2.547187                | -2.113810 | 1.508136  |
| 5             | 6             | 0           | 1.205522                | -2.488200 | 0.985407  |
| 6             | 6             | 0           | 0.048225                | -2.596924 | 1.768782  |
| 7             | 6             | 0           | -0.481755               | -1.659621 | 2.846186  |
| 8             | 6             | 0           | -0.002714               | -0.412632 | 3.242692  |
| 9             | 6             | 0           | -0.930201               | 0.683846  | 3.399772  |
| 10            | 6             | 0           | -0.337991               | 1.851918  | 2.774188  |
| 11            | 6             | 0           | -1.139275               | 2.762436  | 2.111157  |
| 12            | 6             | 0           | -0.707616               | 3.199290  | 0.802747  |
| 13            | 6             | 0           | 0.504874                | 2.734764  | 0.263981  |
| 14            | 6             | 0           | -1.896061               | 3.387535  | 0.007633  |
| 15            | 6             | 0           | -3.059250               | 3.018493  | 0.799727  |
| 16            | 6             | 0           | -2.581023               | 2.604342  | 2.101242  |
| 17            | 6             | 0           | -3.161633               | 1.507378  | 2.740858  |
| 18            | 6             | 0           | -2.307467               | 0.526010  | 3.387480  |
| 19            | 6             | 0           | -2.831240               | -0.785679 | 3.125299  |
| 20            | 6             | 0           | -1.938729               | -1.825866 | 2.838678  |
| 21            | 6             | 0           | -2.314044               | -2.789601 | 1.835961  |
| 22            | 6             | 0           | -3.515245               | -2.690952 | 1.137420  |
| 23            | 6             | 0           | -4.395021               | -1.563845 | 1.383691  |
| 24            | 6             | 0           | -4.058473               | -0.631177 | 2.362822  |
| 25            | 6             | 0           | -4.249509               | 0.790254  | 2.106606  |
| 26            | 6             | 0           | -4.737452               | 1.212983  | 0.865826  |
| 27            | 6             | 0           | -4.128319               | 2.353545  | 0.198807  |
| 28            | 6             | 0           | -5.082812               | 0.236012  | -0.151277 |
| 29            | 6             | 0           | -4.926989               | -1.128228 | 0.106803  |
| 30            | 6             | 0           | -4.700511               | 0.774604  | -1.446641 |
| 31            | 6             | 0           | -4.200498               | -0.071451 | -2.438160 |
| 32            | 6             | 0           | -4.057352               | -1.495350 | -2.178766 |
| 33            | 6             | 0           | -4.401912               | -2.010030 | -0.925363 |
| 34            | 6             | 0           | -3.540675               | -2.984953 | -0.286604 |

|    |   |   |           |           |           |
|----|---|---|-----------|-----------|-----------|
| 35 | 6 | 0 | -2.384382 | -3.427395 | -0.927148 |
| 36 | 6 | 0 | -2.042092 | -2.918006 | -2.242862 |
| 37 | 6 | 0 | -2.858821 | -1.960424 | -2.852222 |
| 38 | 6 | 0 | -2.255953 | -0.819905 | -3.525967 |
| 39 | 6 | 0 | -3.076595 | 0.348588  | -3.257675 |
| 40 | 6 | 0 | -2.471815 | 1.586223  | -3.018960 |
| 41 | 6 | 0 | -2.989461 | 2.463453  | -1.987595 |
| 42 | 6 | 0 | -4.096076 | 2.077151  | -1.226541 |
| 43 | 6 | 0 | -1.856674 | 3.106289  | -1.348753 |
| 44 | 6 | 0 | -0.631409 | 2.600191  | -1.938025 |
| 45 | 6 | 0 | -1.025549 | 1.700588  | -3.009225 |
| 46 | 6 | 0 | -0.247603 | 0.589476  | -3.297040 |
| 47 | 6 | 0 | -0.869308 | -0.694400 | -3.563267 |
| 48 | 6 | 0 | -0.026289 | -1.704605 | -2.955796 |
| 49 | 6 | 0 | -0.598028 | -2.786714 | -2.300179 |
| 50 | 6 | 0 | -0.047910 | -3.197061 | -1.023171 |
| 51 | 6 | 0 | -1.147977 | -3.567155 | -0.177554 |
| 52 | 6 | 0 | -1.107892 | -3.217072 | 1.173288  |
| 53 | 6 | 0 | 1.091065  | -2.598638 | -0.464781 |
| 54 | 6 | 0 | 1.751599  | -1.535116 | -1.222574 |
| 55 | 6 | 0 | 1.125463  | -1.058847 | -2.372260 |
| 56 | 6 | 0 | 0.964847  | 0.370999  | -2.553110 |
| 57 | 6 | 0 | 1.381685  | 1.241665  | -1.539582 |
| 58 | 6 | 0 | 0.526477  | 2.369481  | -1.163162 |
| 59 | 6 | 0 | 2.581263  | -0.615968 | -0.484432 |
| 60 | 6 | 0 | 2.349906  | 0.732205  | -0.594809 |
| 61 | 6 | 0 | 2.807698  | 1.708072  | 0.477026  |
| 62 | 6 | 0 | 3.453920  | -1.230870 | 0.582398  |
| 63 | 6 | 0 | 4.133461  | -0.190936 | 1.442031  |
| 64 | 6 | 0 | 3.481938  | 2.952352  | -0.128590 |
| 65 | 7 | 0 | 3.311444  | 4.101792  | 0.534119  |
| 66 | 6 | 0 | 3.934773  | 5.191192  | 0.067175  |
| 67 | 6 | 0 | 4.751422  | 5.186826  | -1.063362 |
| 68 | 6 | 0 | 4.938784  | 3.978174  | -1.735819 |
| 69 | 6 | 0 | 4.550786  | -2.108369 | -0.068913 |
| 70 | 6 | 0 | 5.266560  | -3.055097 | 0.674998  |
| 71 | 6 | 0 | 6.279068  | -3.771055 | 0.040008  |
| 72 | 6 | 0 | 6.547738  | -3.519048 | -1.305219 |
| 73 | 6 | 0 | 5.785035  | -2.548753 | -1.954178 |
| 74 | 7 | 0 | 4.810077  | -1.853227 | -1.357168 |
| 75 | 6 | 0 | 4.297902  | 2.837409  | -1.260070 |
| 76 | 6 | 0 | 3.821852  | 1.100667  | 1.414787  |
| 77 | 8 | 0 | 2.372832  | -0.041984 | 3.667870  |
| 78 | 8 | 0 | 2.948663  | -2.543991 | 2.572590  |
| 79 | 1 | 0 | 4.845064  | -0.571154 | 2.166874  |
| 80 | 1 | 0 | 3.770579  | 6.109515  | 0.628234  |
| 81 | 1 | 0 | 5.228599  | 6.101814  | -1.400838 |
| 82 | 1 | 0 | 5.573744  | 3.924737  | -2.616015 |
| 83 | 1 | 0 | 5.028052  | -3.222927 | 1.718772  |
| 84 | 1 | 0 | 6.847897  | -4.515921 | 0.589895  |
| 85 | 1 | 0 | 7.326496  | -4.055814 | -1.838364 |
| 86 | 1 | 0 | 5.961626  | -2.314048 | -3.002519 |
| 87 | 1 | 0 | 4.422159  | 1.874239  | -1.745288 |
| 88 | 1 | 0 | 4.290189  | 1.793597  | 2.107509  |

The total electronic energy was calculated to be -3085.7598656 Hartree.

**Table S10.** Optimized structure of INT3b (B3LYP-D3/6-31G(d))

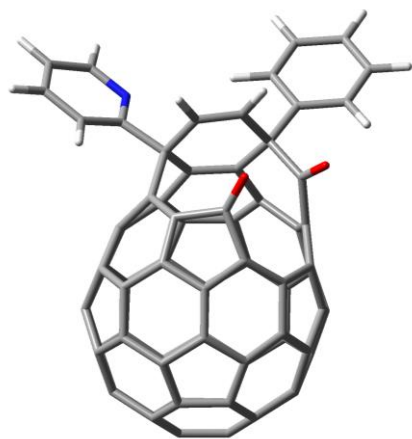

Standard orientation:

| Center Number | Atomic Number | Atomic Type | Coordinates (Angstroms) |           |           |
|---------------|---------------|-------------|-------------------------|-----------|-----------|
|               |               |             | X                       | Y         | Z         |
| 1             | 6             | 0           | 1.465148                | 2.070604  | 1.197940  |
| 2             | 6             | 0           | 0.966791                | 1.567814  | 2.392309  |
| 3             | 6             | 0           | 1.287130                | 0.278122  | 3.170491  |
| 4             | 6             | 0           | 2.492843                | -2.138807 | 1.576930  |
| 5             | 6             | 0           | 1.154812                | -2.502194 | 1.029700  |
| 6             | 6             | 0           | -0.019547               | -2.599723 | 1.788156  |
| 7             | 6             | 0           | -0.562463               | -1.655501 | 2.853372  |
| 8             | 6             | 0           | -0.079383               | -0.413790 | 3.261458  |
| 9             | 6             | 0           | -0.998624               | 0.692161  | 3.398845  |
| 10            | 6             | 0           | -0.382196               | 1.854811  | 2.785865  |
| 11            | 6             | 0           | -1.160634               | 2.772601  | 2.104852  |
| 12            | 6             | 0           | -0.698464               | 3.205541  | 0.805826  |
| 13            | 6             | 0           | 0.520504                | 2.729166  | 0.290602  |
| 14            | 6             | 0           | -1.868484               | 3.407942  | -0.013036 |
| 15            | 6             | 0           | -3.050908               | 3.050538  | 0.755358  |
| 16            | 6             | 0           | -2.603740               | 2.631413  | 2.066374  |
| 17            | 6             | 0           | -3.207077               | 1.539411  | 2.693011  |
| 18            | 6             | 0           | -2.376624               | 0.549094  | 3.357368  |
| 19            | 6             | 0           | -2.908530               | -0.756868 | 3.084379  |
| 20            | 6             | 0           | -2.020717               | -1.805949 | 2.815653  |
| 21            | 6             | 0           | -2.385151               | -2.766048 | 1.805517  |
| 22            | 6             | 0           | -3.570700               | -2.654774 | 1.082571  |
| 23            | 6             | 0           | -4.443550               | -1.518538 | 1.310845  |
| 24            | 6             | 0           | -4.118143               | -0.589553 | 2.297071  |
| 25            | 6             | 0           | -4.289574               | 0.833589  | 2.037226  |
| 26            | 6             | 0           | -4.747503               | 1.261318  | 0.786743  |
| 27            | 6             | 0           | -4.113788               | 2.395842  | 0.132500  |
| 28            | 6             | 0           | -5.082508               | 0.288124  | -0.237454 |
| 29            | 6             | 0           | -4.945036               | -1.077560 | 0.023542  |
| 30            | 6             | 0           | -4.668303               | 0.822872  | -1.524582 |
| 31            | 6             | 0           | -4.155719               | -0.028230 | -2.505301 |
| 32            | 6             | 0           | -4.032590               | -1.453674 | -2.243625 |
| 33            | 6             | 0           | -4.408145               | -1.964895 | -0.997755 |
| 34            | 6             | 0           | -3.570366               | -2.948755 | -0.341485 |

|    |   |   |           |           |           |
|----|---|---|-----------|-----------|-----------|
| 35 | 6 | 0 | -2.405586 | -3.402864 | -0.957824 |
| 36 | 6 | 0 | -2.030953 | -2.896516 | -2.265979 |
| 37 | 6 | 0 | -2.825078 | -1.930766 | -2.892093 |
| 38 | 6 | 0 | -2.196879 | -0.796472 | -3.552860 |
| 39 | 6 | 0 | -3.011145 | 0.380300  | -3.301577 |
| 40 | 6 | 0 | -2.398883 | 1.611698  | -3.050847 |
| 41 | 6 | 0 | -2.928995 | 2.493903  | -2.030307 |
| 42 | 6 | 0 | -4.054682 | 2.118778  | -1.291874 |
| 43 | 6 | 0 | -1.803095 | 3.124347  | -1.367812 |
| 44 | 6 | 0 | -0.570497 | 2.607616  | -1.933489 |
| 45 | 6 | 0 | -0.951793 | 1.712344  | -3.012626 |
| 46 | 6 | 0 | -0.179245 | 0.592828  | -3.282087 |
| 47 | 6 | 0 | -0.808666 | -0.684951 | -3.561087 |
| 48 | 6 | 0 | 0.010862  | -1.703415 | -2.936226 |
| 49 | 6 | 0 | -0.584871 | -2.779915 | -2.293142 |
| 50 | 6 | 0 | -0.065574 | -3.197421 | -1.005181 |
| 51 | 6 | 0 | -1.186393 | -3.556965 | -0.182927 |
| 52 | 6 | 0 | -1.170025 | -3.207013 | 1.168589  |
| 53 | 6 | 0 | 1.066799  | -2.610645 | -0.422154 |
| 54 | 6 | 0 | 1.750408  | -1.549722 | -1.163433 |
| 55 | 6 | 0 | 1.156194  | -1.068258 | -2.328006 |
| 56 | 6 | 0 | 1.015729  | 0.362922  | -2.514032 |
| 57 | 6 | 0 | 1.424286  | 1.232098  | -1.495670 |
| 58 | 6 | 0 | 0.570908  | 2.366531  | -1.137625 |
| 59 | 6 | 0 | 2.565570  | -0.636416 | -0.402424 |
| 60 | 6 | 0 | 2.365559  | 0.714744  | -0.530340 |
| 61 | 6 | 0 | 2.811192  | 1.682399  | 0.554296  |
| 62 | 6 | 0 | 3.420346  | -1.265115 | 0.675130  |
| 63 | 6 | 0 | 4.084103  | -0.236246 | 1.554947  |
| 64 | 6 | 0 | 3.525566  | 2.899063  | -0.063197 |
| 65 | 6 | 0 | 3.445116  | 4.173778  | 0.506523  |
| 66 | 6 | 0 | 4.179571  | 5.210806  | -0.066305 |
| 67 | 6 | 0 | 4.968848  | 4.939959  | -1.183093 |
| 68 | 6 | 0 | 4.990409  | 3.632184  | -1.670618 |
| 69 | 6 | 0 | 4.520132  | -2.116480 | -0.003119 |
| 70 | 6 | 0 | 4.765167  | -3.455312 | 0.312533  |
| 71 | 6 | 0 | 5.780726  | -4.157022 | -0.343887 |
| 72 | 6 | 0 | 6.561734  | -3.528361 | -1.312325 |
| 73 | 6 | 0 | 6.328112  | -2.185299 | -1.620548 |
| 74 | 6 | 0 | 5.315923  | -1.483393 | -0.970404 |
| 75 | 7 | 0 | 4.292437  | 2.629081  | -1.128016 |
| 76 | 6 | 0 | 3.796363  | 1.060267  | 1.515279  |
| 77 | 8 | 0 | 2.286644  | -0.060061 | 3.749545  |
| 78 | 8 | 0 | 2.870277  | -2.575191 | 2.647297  |
| 79 | 1 | 0 | 4.772714  | -0.630906 | 2.293705  |
| 80 | 1 | 0 | 2.815032  | 4.348373  | 1.372707  |
| 81 | 1 | 0 | 4.132969  | 6.212506  | 0.352133  |
| 82 | 1 | 0 | 5.554315  | 5.716876  | -1.664955 |
| 83 | 1 | 0 | 5.596546  | 3.375114  | -2.537502 |
| 84 | 1 | 0 | 4.181339  | -3.956467 | 1.076236  |
| 85 | 1 | 0 | 5.958550  | -5.198809 | -0.090662 |
| 86 | 1 | 0 | 7.349610  | -4.077463 | -1.820877 |
| 87 | 1 | 0 | 6.935445  | -1.682639 | -2.368671 |
| 88 | 1 | 0 | 5.137170  | -0.437107 | -1.206834 |
| 89 | 1 | 0 | 4.267744  | 1.744328  | 2.215433  |

The total electronic energy was calculated to be -3069.7210172 Hartree.

**Table S11.** Optimized structure of **INT3c** (B3LYP-D3/6-31G(d))

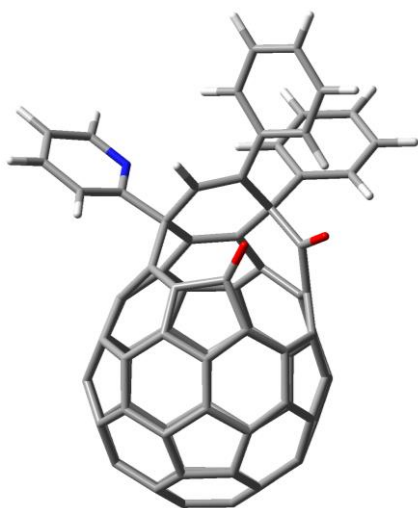

Standard orientation:

| Center Number | Atomic Number | Atomic Type | Coordinates (Angstroms) |           |           |
|---------------|---------------|-------------|-------------------------|-----------|-----------|
|               |               |             | X                       | Y         | Z         |
| 1             | 6             | 0           | 0.958109                | 2.132824  | 1.020202  |
| 2             | 6             | 0           | 0.679259                | 1.519539  | 2.231654  |
| 3             | 6             | 0           | 1.201359                | 0.206950  | 2.825964  |
| 4             | 6             | 0           | 2.266129                | -1.975835 | 0.899062  |
| 5             | 6             | 0           | 0.897595                | -2.405852 | 0.501657  |
| 6             | 6             | 0           | -0.133584               | -2.650389 | 1.417371  |
| 7             | 6             | 0           | -0.558426               | -1.831110 | 2.629378  |
| 8             | 6             | 0           | -0.090294               | -0.593850 | 3.070330  |
| 9             | 6             | 0           | -1.046845               | 0.427017  | 3.437212  |
| 10            | 6             | 0           | -0.606986               | 1.676228  | 2.842980  |
| 11            | 6             | 0           | -1.534504               | 2.581252  | 2.360867  |
| 12            | 6             | 0           | -1.302049               | 3.137850  | 1.047273  |
| 13            | 6             | 0           | -0.150271               | 2.786592  | 0.319742  |
| 14            | 6             | 0           | -2.592705               | 3.315195  | 0.428657  |
| 15            | 6             | 0           | -3.620906               | 2.818722  | 1.330181  |
| 16            | 6             | 0           | -2.955028               | 2.338429  | 2.522505  |
| 17            | 6             | 0           | -3.386100               | 1.160508  | 3.135414  |
| 18            | 6             | 0           | -2.404539               | 0.186920  | 3.585055  |
| 19            | 6             | 0           | -2.892074               | -1.129934 | 3.283007  |
| 20            | 6             | 0           | -1.992981               | -2.086937 | 2.797032  |
| 21            | 6             | 0           | -2.449904               | -2.994045 | 1.774852  |
| 22            | 6             | 0           | -3.736695               | -2.917051 | 1.247208  |
| 23            | 6             | 0           | -4.631462               | -1.867714 | 1.697013  |
| 24            | 6             | 0           | -4.215958               | -0.993667 | 2.699499  |
| 25            | 6             | 0           | -4.510822               | 0.428280  | 2.588431  |
| 26            | 6             | 0           | -5.179913               | 0.912982  | 1.459918  |
| 27            | 6             | 0           | -4.723785               | 2.135829  | 0.817187  |
| 28            | 6             | 0           | -5.608574               | -0.003117 | 0.418044  |
| 29            | 6             | 0           | -5.350387               | -1.370669 | 0.539664  |
| 30            | 6             | 0           | -5.429007               | 0.653895  | -0.866553 |
| 31            | 6             | 0           | -5.022955               | -0.082544 | -1.981059 |
| 32            | 6             | 0           | -4.775470               | -1.510996 | -1.861576 |
| 33            | 6             | 0           | -4.923835               | -2.138695 | -0.620901 |
| 34            | 6             | 0           | -3.937486               | -3.105030 | -0.181087 |
| 35            | 6             | 0           | -2.855989               | -3.426866 | -0.999464 |
| 36            | 6             | 0           | -2.717658               | -2.800495 | -2.301954 |
| 37            | 6             | 0           | -3.654844               | -1.850373 | -2.719370 |
| 38            | 6             | 0           | -3.204076               | -0.627626 | -3.367074 |
| 39            | 6             | 0           | -4.039733               | 0.465494  | -2.899919 |
| 40            | 6             | 0           | -3.471002               | 1.715551  | -2.638997 |
| 41            | 6             | 0           | -3.890900               | 2.478793  | -1.480383 |
| 42            | 6             | 0           | -4.865759               | 1.969609  | -0.618396 |
| 43            | 6             | 0           | -2.717255               | 3.137964  | -0.940225 |
| 44            | 6             | 0           | -1.556907               | 2.753749  | -1.722692 |
| 45            | 6             | 0           | -2.043759               | 1.916064  | -2.805642 |
| 46            | 6             | 0           | -1.255498               | 0.878913  | -3.280559 |
| 47            | 6             | 0           | -1.842240               | -0.416226 | -3.569827 |
| 48            | 6             | 0           | -0.876811               | -1.416813 | -3.162319 |
| 49            | 6             | 0           | -1.302391               | -2.579092 | -2.533906 |
| 50            | 6             | 0           | -0.568135               | -3.051108 | -1.376467 |
| 51            | 6             | 0           | -1.525388               | -3.548662 | -0.429269 |
| 52            | 6             | 0           | -1.323577               | -3.297058 | 0.929431  |
| 53            | 6             | 0           | 0.602114                | -2.427037 | -0.922242 |
| 54            | 6             | 0           | 1.105489                | -1.271305 | -1.662749 |
| 55            | 6             | 0           | 0.310057                | -0.748225 | -2.680103 |
| 56            | 6             | 0           | 0.054517                | 0.678554  | -2.719976 |
| 57            | 6             | 0           | 0.557063                | 1.491640  | -1.698645 |
| 58            | 6             | 0           | -0.296620               | 2.533471  | -1.125070 |
| 59            | 6             | 0           | 1.974348                | -0.364045 | -0.950511 |
| 60            | 6             | 0           | 1.661445                | 0.969646  | -0.928016 |
| 61            | 6             | 0           | 2.205500                | 1.877438  | 0.157220  |
| 62            | 6             | 0           | 3.035712                | -1.017767 | -0.073191 |
| 63            | 6             | 0           | 3.863710                | 0.025535  | 0.687744  |
| 64            | 6             | 0           | 2.747839                | 3.184730  | -0.460535 |
| 65            | 6             | 0           | 2.664922                | 4.412312  | 0.203829  |
| 66            | 6             | 0           | 3.250377                | 5.532492  | -0.384408 |
| 67            | 6             | 0           | 3.899192                | 5.388482  | -1.609751 |
| 68            | 6             | 0           | 3.937786                | 4.118077  | -2.187140 |
| 69            | 6             | 0           | 3.967630                | -1.830743 | -1.003061 |
| 70            | 6             | 0           | 4.268927                | -3.179535 | -0.806750 |
| 71            | 6             | 0           | 5.133137                | -3.841608 | -1.683615 |
| 72            | 6             | 0           | 5.707021                | -3.161925 | -2.756299 |
| 73            | 6             | 0           | 5.415583                | -1.808627 | -2.949583 |
| 74            | 6             | 0           | 4.551267                | -1.148426 | -2.080620 |
| 75            | 6             | 0           | 5.247962                | -0.280498 | 1.153002  |
| 76            | 6             | 0           | 5.587339                | -1.376288 | 1.960928  |
| 77            | 6             | 0           | 6.910483                | -1.583611 | 2.348886  |
| 78            | 6             | 0           | 7.920454                | -0.713280 | 1.934337  |
| 79            | 6             | 0           | 7.596877                | 0.375142  | 1.123481  |
| 80            | 6             | 0           | 6.274472                | 0.586181  | 0.735807  |
| 81            | 7             | 0           | 3.382748                | 3.036206  | -1.631260 |
| 82            | 6             | 0           | 3.401989                | 1.272862  | 0.848637  |
| 83            | 8             | 0           | 2.310191                | -0.092904 | 3.185901  |
| 84            | 8             | 0           | 2.763173                | -2.457405 | 1.899534  |
| 85            | 1             | 0           | 2.149021                | 4.487599  | 1.155404  |
| 86            | 1             | 0           | 3.198248                | 6.500226  | 0.106911  |
| 87            | 1             | 0           | 4.366176                | 6.233360  | -2.106397 |
| 88            | 1             | 0           | 4.438419                | 3.958878  | -3.140583 |
| 89            | 1             | 0           | 3.851129                | -3.720262 | 0.035080  |
| 90            | 1             | 0           | 5.358739                | -4.891755 | -1.518587 |
| 91            | 1             | 0           | 6.380079                | -3.679031 | -3.434780 |
| 92            | 1             | 0           | 5.863362                | -1.265707 | -3.777701 |
| 93            | 1             | 0           | 4.328294                | -0.094101 | -2.226069 |
| 94            | 1             | 0           | 4.807730                | -2.046495 | 2.294780  |
| 95            | 1             | 0           | 7.151695                | -2.432363 | 2.983854  |

|    |   |   |          |           |          |                                                                         |   |   |          |          |          |
|----|---|---|----------|-----------|----------|-------------------------------------------------------------------------|---|---|----------|----------|----------|
| 96 | 1 | 0 | 8.950533 | -0.884914 | 2.236062 | 99                                                                      | 1 | 0 | 3.988379 | 1.969698 | 1.440114 |
| 97 | 1 | 0 | 8.373451 | 1.055192  | 0.782629 | -----                                                                   |   |   |          |          |          |
| 98 | 1 | 0 | 6.027135 | 1.416482  | 0.080085 | The total electronic energy was calculated to be -3300.7870091 Hartree. |   |   |          |          |          |

**Table S12.** Optimized structure of INT3d (B3LYP-D3/6-31G(d))

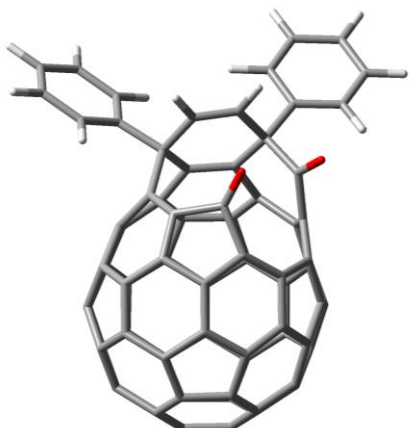

Standard orientation:

| Center Number | Atomic Number | Atomic Type | Coordinates (Angstroms) |           |           |
|---------------|---------------|-------------|-------------------------|-----------|-----------|
|               |               |             | X                       | Y         | Z         |
| 1             | 6             | 0           | 1.490380                | 2.071707  | 1.138890  |
| 2             | 6             | 0           | 0.993278                | 1.600831  | 2.345893  |
| 3             | 6             | 0           | 1.307226                | 0.328862  | 3.152039  |
| 4             | 6             | 0           | 2.483989                | -2.123720 | 1.608210  |
| 5             | 6             | 0           | 1.141845                | -2.487313 | 1.073559  |
| 6             | 6             | 0           | -0.029660               | -2.563307 | 1.838640  |
| 7             | 6             | 0           | -0.560678               | -1.594747 | 2.887024  |
| 8             | 6             | 0           | -0.065192               | -0.349218 | 3.266847  |
| 9             | 6             | 0           | -0.974853               | 0.767090  | 3.383111  |
| 10            | 6             | 0           | -0.351390               | 1.909457  | 2.740305  |
| 11            | 6             | 0           | -1.124765               | 2.819040  | 2.043547  |
| 12            | 6             | 0           | -0.664456               | 3.219270  | 0.733455  |
| 13            | 6             | 0           | 0.547687                | 2.721746  | 0.223380  |
| 14            | 6             | 0           | -1.836263               | 3.414709  | -0.084353 |
| 15            | 6             | 0           | -3.018380               | 3.084297  | 0.696396  |
| 16            | 6             | 0           | -2.569183               | 2.689659  | 2.014413  |
| 17            | 6             | 0           | -3.179315               | 1.616771  | 2.667210  |
| 18            | 6             | 0           | -2.354381               | 0.634391  | 3.349640  |
| 19            | 6             | 0           | -2.898067               | -0.672760 | 3.106753  |
| 20            | 6             | 0           | -2.019990               | -1.734613 | 2.857610  |
| 21            | 6             | 0           | -2.395745               | -2.712975 | 1.869306  |
| 22            | 6             | 0           | -3.582877               | -2.607627 | 1.148113  |
| 23            | 6             | 0           | -4.446044               | -1.460102 | 1.355402  |
| 24            | 6             | 0           | -4.108951               | -0.512586 | 2.319966  |
| 25            | 6             | 0           | -4.269909               | 0.905921  | 2.030400  |
| 26            | 6             | 0           | -4.729575               | 1.310570  | 0.772932  |
| 27            | 6             | 0           | -4.089448               | 2.425668  | 0.091941  |
| 28            | 6             | 0           | -5.076347               | 0.318269  | -0.228762 |
| 29            | 6             | 0           | -4.948833               | -1.042588 | 0.060846  |
| 30            | 6             | 0           | -4.663329               | 0.821925  | -1.528727 |
| 31            | 6             | 0           | -4.162399               | -0.053921 | -2.493605 |
| 32            | 6             | 0           | -4.048883               | -1.474140 | -2.201519 |
| 33            | 6             | 0           | -4.422961               | -1.955450 | -0.943362 |
| 34            | 6             | 0           | -3.590092               | -2.931581 | -0.269549 |
| 35            | 6             | 0           | -2.431237               | -3.407381 | -0.880617 |

|    |   |   |           |           |           |
|----|---|---|-----------|-----------|-----------|
| 36 | 6 | 0 | -2.058391 | -2.932444 | -2.200812 |
| 37 | 6 | 0 | -2.847753 | -1.974400 | -2.844390 |
| 38 | 6 | 0 | -2.213977 | -0.859678 | -3.532710 |
| 39 | 6 | 0 | -3.017965 | 0.328511  | -3.303048 |
| 40 | 6 | 0 | -2.395200 | 1.560160  | -3.081399 |
| 41 | 6 | 0 | -2.913567 | 2.468166  | -2.077405 |
| 42 | 6 | 0 | -4.038788 | 2.117771  | -1.326367 |
| 43 | 6 | 0 | -1.779730 | 3.103310  | -1.433326 |
| 44 | 6 | 0 | -0.554018 | 2.564853  | -1.992834 |
| 45 | 6 | 0 | -0.947240 | 1.649660  | -3.051200 |
| 46 | 6 | 0 | -0.184517 | 0.519311  | -3.301638 |
| 47 | 6 | 0 | -0.824936 | -0.759160 | -3.549647 |
| 48 | 6 | 0 | -0.010492 | -1.770220 | -2.906540 |
| 49 | 6 | 0 | -0.611623 | -2.826791 | -2.236167 |
| 50 | 6 | 0 | -0.090177 | -3.218724 | -0.940937 |
| 51 | 6 | 0 | -1.210195 | -3.553071 | -0.107213 |
| 52 | 6 | 0 | -1.186340 | -3.175831 | 1.236798  |
| 53 | 6 | 0 | 1.048760  | -2.627654 | -0.375268 |
| 54 | 6 | 0 | 1.739612  | -1.591599 | -1.145508 |
| 55 | 6 | 0 | 1.142546  | -1.130969 | -2.316987 |
| 56 | 6 | 0 | 1.012391  | 0.296818  | -2.533633 |
| 57 | 6 | 0 | 1.432415  | 1.184692  | -1.535781 |
| 58 | 6 | 0 | 0.588311  | 2.331971  | -1.196733 |
| 59 | 6 | 0 | 2.570584  | -0.669933 | -0.411718 |
| 60 | 6 | 0 | 2.377603  | 0.682653  | -0.563953 |
| 61 | 6 | 0 | 2.837909  | 1.673297  | 0.497899  |
| 62 | 6 | 0 | 3.419989  | -1.286059 | 0.678998  |
| 63 | 6 | 0 | 4.100536  | -0.243311 | 1.528645  |
| 64 | 6 | 0 | 3.539324  | 2.903158  | -0.112054 |
| 65 | 6 | 0 | 3.498022  | 4.142071  | 0.537857  |
| 66 | 6 | 0 | 4.200410  | 5.234814  | 0.028649  |
| 67 | 6 | 0 | 4.958018  | 5.100888  | -1.136079 |
| 68 | 6 | 0 | 5.012939  | 3.865209  | -1.783516 |
| 69 | 6 | 0 | 4.490588  | -2.187671 | 0.020890  |
| 70 | 6 | 0 | 4.573442  | -3.566747 | 0.231247  |
| 71 | 6 | 0 | 5.555711  | -4.320613 | -0.417026 |
| 72 | 6 | 0 | 6.465778  | -3.706545 | -1.276195 |
| 73 | 6 | 0 | 6.393385  | -2.326486 | -1.483127 |
| 74 | 6 | 0 | 5.413403  | -1.575172 | -0.839043 |
| 75 | 6 | 0 | 4.311028  | 2.773663  | -1.271854 |
| 76 | 6 | 0 | 3.819250  | 1.054498  | 1.466289  |
| 77 | 8 | 0 | 2.308113  | -0.004910 | 3.731423  |
| 78 | 8 | 0 | 2.865640  | -2.541333 | 2.683747  |
| 79 | 1 | 0 | 4.792919  | -0.626511 | 2.269925  |
| 80 | 1 | 0 | 2.908921  | 4.255207  | 1.444020  |
| 81 | 1 | 0 | 4.152568  | 6.191305  | 0.542195  |
| 82 | 1 | 0 | 5.502199  | 5.952296  | -1.535397 |
| 83 | 1 | 0 | 5.601942  | 3.749061  | -2.689345 |
| 84 | 1 | 0 | 3.887871  | -4.062701 | 0.909166  |
| 85 | 1 | 0 | 5.607210  | -5.391956 | -0.242612 |
| 86 | 1 | 0 | 7.228502  | -4.295848 | -1.777730 |
| 87 | 1 | 0 | 7.100796  | -1.834690 | -2.145532 |
| 88 | 1 | 0 | 5.361088  | -0.500758 | -0.994358 |
| 89 | 1 | 0 | 4.354997  | 1.815172  | -1.781491 |
| 90 | 1 | 0 | 4.301474  | 1.748087  | 2.148806  |

-----

The total electronic energy was calculated to be -3053.6822825 Hartree.



**Table S13.** Optimized structure of INT3e (B3LYP-D3/6-31G(d))

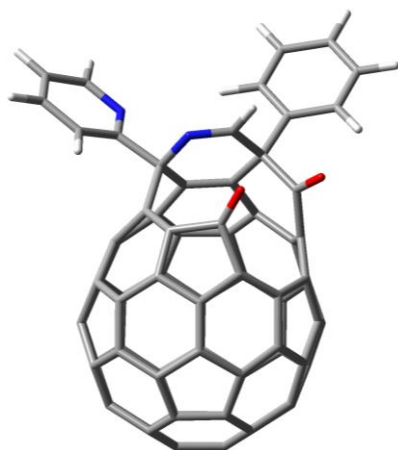

Standard orientation:

| Center Number | Atomic Number | Atomic Type | Coordinates (Angstroms) |           |           |
|---------------|---------------|-------------|-------------------------|-----------|-----------|
|               |               |             | X                       | Y         | Z         |
| 1             | 6             | 0           | 1.495022                | 1.995730  | 1.204885  |
| 2             | 6             | 0           | 1.007740                | 1.476114  | 2.397198  |
| 3             | 6             | 0           | 1.309005                | 0.156720  | 3.134370  |
| 4             | 6             | 0           | 2.465358                | -2.222004 | 1.480542  |
| 5             | 6             | 0           | 1.110452                | -2.549273 | 0.945695  |
| 6             | 6             | 0           | -0.056080               | -2.650211 | 1.717128  |
| 7             | 6             | 0           | -0.574621               | -1.724874 | 2.811214  |
| 8             | 6             | 0           | -0.068935               | -0.499976 | 3.239160  |
| 9             | 6             | 0           | -0.964066               | 0.618440  | 3.411654  |
| 10            | 6             | 0           | -0.331294               | 1.780541  | 2.813555  |
| 11            | 6             | 0           | -1.102051               | 2.724793  | 2.160055  |
| 12            | 6             | 0           | -0.649107               | 3.177271  | 0.864626  |
| 13            | 6             | 0           | 0.555594                | 2.693128  | 0.322685  |
| 14            | 6             | 0           | -1.825935               | 3.417855  | 0.065427  |
| 15            | 6             | 0           | -3.004540               | 3.064146  | 0.841135  |
| 16            | 6             | 0           | -2.548390               | 2.609529  | 2.137032  |
| 17            | 6             | 0           | -3.164656               | 1.516269  | 2.748624  |
| 18            | 6             | 0           | -2.344407               | 0.498679  | 3.383410  |
| 19            | 6             | 0           | -2.900758               | -0.792833 | 3.088971  |
| 20            | 6             | 0           | -2.034366               | -1.851524 | 2.787427  |
| 21            | 6             | 0           | -2.424525               | -2.782196 | 1.759909  |
| 22            | 6             | 0           | -3.616172               | -2.635607 | 1.053800  |
| 23            | 6             | 0           | -4.467684               | -1.490728 | 1.317169  |
| 24            | 6             | 0           | -4.115748               | -0.588576 | 2.319122  |
| 25            | 6             | 0           | -4.266300               | 0.842470  | 2.091243  |
| 26            | 6             | 0           | -4.731771               | 1.303922  | 0.855820  |
| 27            | 6             | 0           | -4.086644               | 2.441287  | 0.218154  |
| 28            | 6             | 0           | -5.095525               | 0.358504  | -0.184425 |
| 29            | 6             | 0           | -4.977359               | -1.014448 | 0.045812  |
| 30            | 6             | 0           | -4.688377               | 0.913976  | -1.465046 |
| 31            | 6             | 0           | -4.202171               | 0.075891  | -2.469972 |
| 32            | 6             | 0           | -4.099070               | -1.356667 | -2.240164 |
| 33            | 6             | 0           | -4.467296               | -1.888332 | -1.000724 |
| 34            | 6             | 0           | -3.637283               | -2.898774 | -0.376050 |

|    |   |   |           |           |           |
|----|---|---|-----------|-----------|-----------|
| 35 | 6 | 0 | -2.487354 | -3.357703 | -1.016121 |
| 36 | 6 | 0 | -2.120981 | -2.829909 | -2.317918 |
| 37 | 6 | 0 | -2.907361 | -1.838851 | -2.913596 |
| 38 | 6 | 0 | -2.269584 | -0.701072 | -3.558775 |
| 39 | 6 | 0 | -3.061239 | 0.482860  | -3.272288 |
| 40 | 6 | 0 | -2.425823 | 1.698725  | -3.003685 |
| 41 | 6 | 0 | -2.928225 | 2.566900  | -1.957280 |
| 42 | 6 | 0 | -4.050334 | 2.194255  | -1.212418 |
| 43 | 6 | 0 | -1.783898 | 3.164652  | -1.296340 |
| 44 | 6 | 0 | -0.567662 | 2.641745  | -1.890182 |
| 45 | 6 | 0 | -0.976982 | 1.775552  | -2.983390 |
| 46 | 6 | 0 | -0.226328 | 0.649878  | -3.288607 |
| 47 | 6 | 0 | -0.880109 | -0.611705 | -3.584394 |
| 48 | 6 | 0 | -0.069048 | -1.655853 | -2.991056 |
| 49 | 6 | 0 | -0.673626 | -2.735077 | -2.360923 |
| 50 | 6 | 0 | -0.145171 | -3.187346 | -1.087929 |
| 51 | 6 | 0 | -1.261272 | -3.546720 | -0.259767 |
| 52 | 6 | 0 | -1.223093 | -3.226754 | 1.098649  |
| 53 | 6 | 0 | 1.003484  | -2.629742 | -0.507251 |
| 54 | 6 | 0 | 1.696709  | -1.569210 | -1.239812 |
| 55 | 6 | 0 | 1.094942  | -1.052037 | -2.386415 |
| 56 | 6 | 0 | 0.975337  | 0.385050  | -2.542650 |
| 57 | 6 | 0 | 1.409551  | 1.229000  | -1.513461 |
| 58 | 6 | 0 | 0.579997  | 2.366377  | -1.115749 |
| 59 | 6 | 0 | 2.525915  | -0.678716 | -0.471581 |
| 60 | 6 | 0 | 2.348705  | 0.674654  | -0.571846 |
| 61 | 6 | 0 | 2.823143  | 1.589199  | 0.543332  |
| 62 | 6 | 0 | 3.368724  | -1.299723 | 0.609520  |
| 63 | 6 | 0 | 3.970777  | -0.238798 | 1.524389  |
| 64 | 6 | 0 | 3.584898  | 2.798685  | -0.026652 |
| 65 | 6 | 0 | 3.614957  | 4.024863  | 0.642483  |
| 66 | 6 | 0 | 4.382524  | 5.055729  | 0.106455  |
| 67 | 6 | 0 | 5.095788  | 4.822530  | -1.070099 |
| 68 | 6 | 0 | 5.012553  | 3.557655  | -1.651678 |
| 69 | 6 | 0 | 4.549645  | -2.063223 | -0.033309 |
| 70 | 6 | 0 | 4.887876  | -3.379900 | 0.291810  |
| 71 | 6 | 0 | 5.973003  | -3.999228 | -0.334019 |
| 72 | 6 | 0 | 6.733686  | -3.309949 | -1.277764 |
| 73 | 6 | 0 | 6.408190  | -1.988453 | -1.592484 |
| 74 | 6 | 0 | 5.324378  | -1.367452 | -0.975230 |
| 75 | 7 | 0 | 4.275616  | 2.560695  | -1.146657 |
| 76 | 7 | 0 | 3.744160  | 1.008297  | 1.516797  |
| 77 | 8 | 0 | 2.310784  | -0.245144 | 3.667884  |
| 78 | 8 | 0 | 2.870271  | -2.720149 | 2.513104  |
| 79 | 1 | 0 | 4.647082  | -0.628526 | 2.284190  |
| 80 | 1 | 0 | 3.052895  | 4.159039  | 1.560640  |
| 81 | 1 | 0 | 4.424844  | 6.023211  | 0.599099  |
| 82 | 1 | 0 | 5.705062  | 5.597549  | -1.524906 |
| 83 | 1 | 0 | 5.560116  | 3.329762  | -2.564301 |
| 84 | 1 | 0 | 4.321232  | -3.925988 | 1.036601  |
| 85 | 1 | 0 | 6.221757  | -5.025159 | -0.076166 |
| 86 | 1 | 0 | 7.576918  | -3.795862 | -1.761097 |
| 87 | 1 | 0 | 6.998644  | -1.437843 | -2.319881 |
| 88 | 1 | 0 | 5.076161  | -0.337552 | -1.221523 |

The total electronic energy was calculated to be -3085.7611657 Hartree.

**Table S14.** Optimized structure of INT3f (B3LYP-D3/6-31G(d))

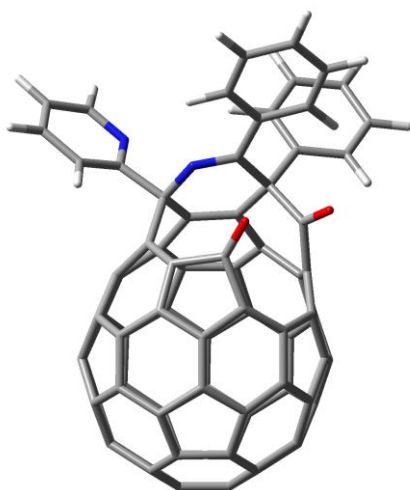

Standard orientation:

| Center Number | Atomic Number | Atomic Type | Coordinates (Angstroms) |           |           |
|---------------|---------------|-------------|-------------------------|-----------|-----------|
|               |               |             | X                       | Y         | Z         |
| 1             | 6             | 0           | 1.066732                | 2.112507  | 0.814978  |
| 2             | 6             | 0           | 0.826678                | 1.562463  | 2.065857  |
| 3             | 6             | 0           | 1.325359                | 0.252795  | 2.696160  |
| 4             | 6             | 0           | 2.298706                | -2.043557 | 0.833932  |
| 5             | 6             | 0           | 0.882596                | -2.419890 | 0.536686  |
| 6             | 6             | 0           | -0.119422               | -2.600525 | 1.499679  |
| 7             | 6             | 0           | -0.484936               | -1.720777 | 2.687323  |
| 8             | 6             | 0           | 0.025294                | -0.475937 | 3.046287  |
| 9             | 6             | 0           | -0.884378               | 0.588930  | 3.395617  |
| 10            | 6             | 0           | -0.430263               | 1.790418  | 2.718009  |
| 11            | 6             | 0           | -1.352775               | 2.695378  | 2.224796  |
| 12            | 6             | 0           | -1.158868               | 3.182382  | 0.878059  |
| 13            | 6             | 0           | -0.045694               | 2.768387  | 0.124125  |
| 14            | 6             | 0           | -2.468343               | 3.366030  | 0.301015  |
| 15            | 6             | 0           | -3.472013               | 2.941144  | 1.263924  |
| 16            | 6             | 0           | -2.772361               | 2.500866  | 2.451964  |
| 17            | 6             | 0           | -3.212227               | 1.369312  | 3.140968  |
| 18            | 6             | 0           | -2.240824               | 0.392884  | 3.604746  |
| 19            | 6             | 0           | -2.772028               | -0.924291 | 3.386548  |
| 20            | 6             | 0           | -1.916895               | -1.929605 | 2.917427  |
| 21            | 6             | 0           | -2.431275               | -2.870205 | 1.955794  |
| 22            | 6             | 0           | -3.734656               | -2.784455 | 1.471866  |
| 23            | 6             | 0           | -4.586518               | -1.691593 | 1.902240  |
| 24            | 6             | 0           | -4.112010               | -0.780550 | 2.844037  |
| 25            | 6             | 0           | -4.375184               | 0.641832  | 2.673281  |
| 26            | 6             | 0           | -5.074052               | 1.088214  | 1.547300  |
| 27            | 6             | 0           | -4.612094               | 2.265353  | 0.828214  |
| 28            | 6             | 0           | -5.565063               | 0.134123  | 0.568817  |
| 29            | 6             | 0           | -5.336232               | -1.232255 | 0.748673  |
| 30            | 6             | 0           | -5.418991               | 0.723354  | -0.752582 |
| 31            | 6             | 0           | -5.073970               | -0.076390 | -1.843621 |
| 32            | 6             | 0           | -4.856141               | -1.503259 | -1.662216 |
| 33            | 6             | 0           | -4.971953               | -2.065935 | -0.387529 |
| 34            | 6             | 0           | -3.993276               | -3.035023 | 0.062786  |
| 35            | 6             | 0           | -2.951057               | -3.423577 | -0.777555 |
| 36            | 6             | 0           | -2.847257               | -2.863830 | -2.112937 |
| 37            | 6             | 0           | -3.777497               | -1.912364 | -2.542680 |
| 38            | 6             | 0           | -3.324019               | -0.734953 | -3.267893 |
| 39            | 6             | 0           | -4.114823               | 0.400800  | -2.825216 |
| 40            | 6             | 0           | -3.506983               | 1.647468  | -2.648912 |
| 41            | 6             | 0           | -3.862715               | 2.475958  | -1.513564 |
| 42            | 6             | 0           | -4.814669               | 2.034176  | -0.590954 |
| 43            | 6             | 0           | -2.652923               | 3.129267  | -1.051851 |
| 44            | 6             | 0           | -1.534533               | 2.680619  | -1.860329 |
| 45            | 6             | 0           | -2.083353               | 1.803942  | -2.881802 |
| 46            | 6             | 0           | -1.339492               | 0.724629  | -3.335604 |
| 47            | 6             | 0           | -1.967126               | -0.568769 | -3.534022 |
| 48            | 6             | 0           | -1.009727               | -1.571194 | -3.110831 |
| 49            | 6             | 0           | -1.437115               | -2.688517 | -2.406620 |
| 50            | 6             | 0           | -0.671053               | -3.120445 | -1.254127 |
| 51            | 6             | 0           | -1.602720               | -3.550144 | -0.250549 |
| 52            | 6             | 0           | -1.343155               | -3.238945 | 1.085260  |
| 53            | 6             | 0           | 0.528544                | -2.502018 | -0.873464 |
| 54            | 6             | 0           | 1.029685                | -1.400295 | -1.693181 |
| 55            | 6             | 0           | 0.210094                | -0.908886 | -2.708997 |
| 56            | 6             | 0           | -0.012745               | 0.520329  | -2.818587 |
| 57            | 6             | 0           | 0.549225                | 1.375288  | -1.864287 |
| 58            | 6             | 0           | -0.256289               | 2.459976  | -1.303363 |
| 59            | 6             | 0           | 1.936362                | -0.474429 | -1.060614 |
| 60            | 6             | 0           | 1.664199                | 0.863043  | -1.110814 |
| 61            | 6             | 0           | 2.274362                | 1.778340  | -0.075430 |
| 62            | 6             | 0           | 3.013381                | -1.075626 | -0.174838 |
| 63            | 6             | 0           | 3.788580                | 0.024290  | 0.599063  |
| 64            | 6             | 0           | 2.867122                | 3.041510  | -0.735105 |
| 65            | 6             | 0           | 2.915113                | 4.266959  | -0.065454 |
| 66            | 6             | 0           | 3.539042                | 5.342850  | -0.692315 |
| 67            | 6             | 0           | 4.097020                | 5.154356  | -1.957263 |
| 68            | 6             | 0           | 4.009066                | 3.887137  | -2.533610 |
| 69            | 6             | 0           | 3.950630                | -1.836216 | -1.139828 |
| 70            | 6             | 0           | 4.002123                | -3.230970 | -1.216003 |
| 71            | 6             | 0           | 4.830651                | -3.854284 | -2.151587 |
| 72            | 6             | 0           | 5.610767                | -3.091281 | -3.020276 |
| 73            | 6             | 0           | 5.552852                | -1.697051 | -2.954248 |
| 74            | 6             | 0           | 4.723820                | -1.072530 | -2.025004 |
| 75            | 6             | 0           | 5.063145                | -0.281468 | 1.322627  |
| 76            | 6             | 0           | 5.619378                | -1.564093 | 1.443231  |
| 77            | 6             | 0           | 6.822968                | -1.760162 | 2.120302  |
| 78            | 6             | 0           | 7.498304                | -0.683001 | 2.690601  |
| 79            | 6             | 0           | 6.955668                | 0.600471  | 2.580101  |
| 80            | 6             | 0           | 5.757450                | 0.797415  | 1.904839  |
| 81            | 7             | 0           | 3.410026                | 2.847078  | -1.941375 |
| 82            | 7             | 0           | 3.388658                | 1.237163  | 0.666389  |
| 83            | 8             | 0           | 2.432737                | -0.107114 | 3.002943  |
| 84            | 8             | 0           | 2.874835                | -2.575200 | 1.760613  |
| 85            | 1             | 0           | 2.475082                | 4.368051  | 0.920983  |
| 86            | 1             | 0           | 3.589911                | 6.310850  | -0.201332 |
| 87            | 1             | 0           | 4.591085                | 5.965032  | -2.483973 |
| 88            | 1             | 0           | 4.437440                | 3.693846  | -3.515424 |
| 89            | 1             | 0           | 3.416380                | -3.840492 | -0.535500 |
| 90            | 1             | 0           | 4.865118                | -4.939466 | -2.195788 |
| 91            | 1             | 0           | 6.257245                | -3.578281 | -3.745098 |
| 92            | 1             | 0           | 6.152049                | -1.092494 | -3.629650 |
| 93            | 1             | 0           | 4.661729                | 0.012663  | -1.991540 |
| 94            | 1             | 0           | 5.115884                | -2.422736 | 1.029789  |
| 95            | 1             | 0           | 7.228280                | -2.765097 | 2.200856  |

|    |   |   |          |           |          |                                                                         |
|----|---|---|----------|-----------|----------|-------------------------------------------------------------------------|
| 96 | 1 | 0 | 8.436782 | -0.839164 | 3.216429 | -----                                                                   |
| 97 | 1 | 0 | 7.469471 | 1.450722  | 3.021152 | The total electronic energy was calculated to be -3316.8283768 Hartree. |
| 98 | 1 | 0 | 5.332836 | 1.789962  | 1.816701 |                                                                         |

## 6. Stabilization Energies of INT2

The structures of  $\beta$ -oxo-phosphorus ylides **INT2** were optimized at the B3LYP-D3/6-31G(d) level of theory.

**Table S15.** Stabilization energies and bond distance of **INT2** (B3LYP-D3/6-31G(d))

| Addends  | $\Delta\Delta G^a$<br>(kcal/mol) | $d[\text{C}(b)\cdots\text{C}(c)]$<br>(Å) |
|----------|----------------------------------|------------------------------------------|
| <b>a</b> | 0.0                              | 3.35                                     |
| <b>b</b> | -1.0                             | 3.36                                     |
| <b>c</b> | +0.1                             | 3.36                                     |
| <b>d</b> | -1.4                             | 3.34                                     |
| <b>e</b> | -0.4                             | 3.32                                     |
| <b>f</b> | -3.3                             | 3.32                                     |

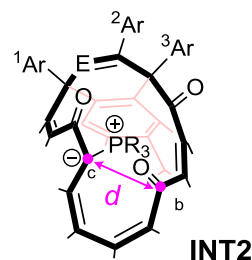

$^a\Delta\Delta G = \Delta G(\mathbf{INT2}) - \Delta G(\mathbf{INT2a})$  where  $\Delta G(\mathbf{INT2}) = G(\mathbf{INT2}) + G(\text{O=PPh}_3) - G(\mathbf{INT1}) - 2G(\text{PPh}_3)$ .

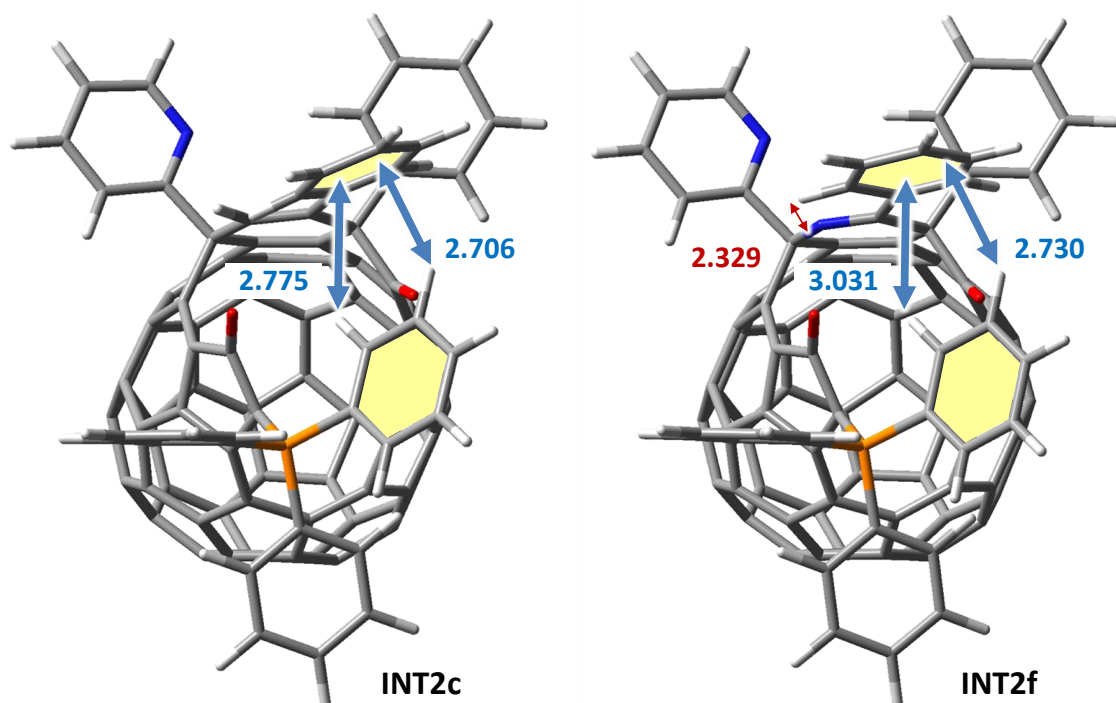

**Figure S8.** Optimized structure of **INT2c** and **INT2f** with selected bond lengths (Å), calculated at the B3LYP-D3/6-31G(d) level of theory.

**Table S16.** Optimized structure of PPh<sub>3</sub> (B3LYP-D3/6-31G(d))

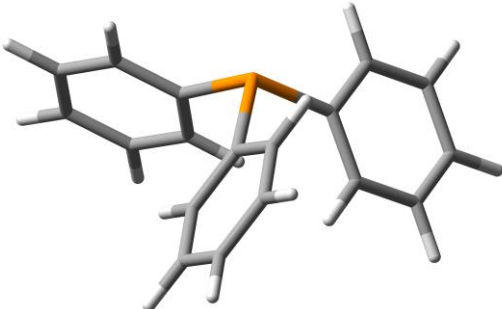

Standard orientation:

| Center Number | Atomic Number | Atomic Type | Coordinates (Angstroms) |           |           |
|---------------|---------------|-------------|-------------------------|-----------|-----------|
|               |               |             | X                       | Y         | Z         |
| 1             | 15            | 0           | 0.000647                | 0.000582  | -1.261843 |
| 2             | 6             | 0           | -0.401543               | -1.609211 | -0.438332 |
| 3             | 6             | 0           | 1.595544                | 0.457050  | -0.437580 |
| 4             | 6             | 0           | -1.193195               | 1.152592  | -0.437740 |
| 5             | 6             | 0           | -1.372277               | 2.415761  | -1.025403 |
| 6             | 6             | 0           | -2.238762               | 3.350695  | -0.459281 |
| 7             | 6             | 0           | -2.953875               | 3.030571  | 0.696970  |
| 8             | 6             | 0           | -2.793382               | 1.773961  | 1.283593  |
| 9             | 6             | 0           | -1.917509               | 0.841893  | 0.723296  |
| 10            | 6             | 0           | -1.411996               | -2.390936 | -1.022366 |
| 11            | 6             | 0           | -1.790166               | -3.608395 | -0.456706 |
| 12            | 6             | 0           | -1.150858               | -4.072571 | 0.695171  |
| 13            | 6             | 0           | -0.136958               | -3.310275 | 1.278017  |
| 14            | 6             | 0           | 0.233968                | -2.085878 | 0.718278  |
| 15            | 6             | 0           | 2.778062                | -0.023279 | -1.024041 |
| 16            | 6             | 0           | 4.021632                | 0.258617  | -0.458873 |
| 17            | 6             | 0           | 4.103733                | 1.041268  | 0.695014  |
| 18            | 6             | 0           | 2.936202                | 1.534334  | 1.280445  |
| 19            | 6             | 0           | 1.690344                | 1.242534  | 0.721325  |
| 20            | 1             | 0           | -0.828904               | 2.667697  | -1.933450 |
| 21            | 1             | 0           | -2.362081               | 4.324959  | -0.925129 |
| 22            | 1             | 0           | -3.635875               | 3.754621  | 1.134953  |
| 23            | 1             | 0           | -3.348973               | 1.517530  | 2.182140  |
| 24            | 1             | 0           | -1.797069               | -0.130313 | 1.191463  |
| 25            | 1             | 0           | -1.905461               | -2.042481 | -1.926982 |
| 26            | 1             | 0           | -2.577110               | -4.198331 | -0.919433 |
| 27            | 1             | 0           | -1.438222               | -5.024997 | 1.132785  |
| 28            | 1             | 0           | 0.366239                | -3.666803 | 2.173298  |
| 29            | 1             | 0           | 1.019975                | -1.498877 | 1.183468  |
| 30            | 1             | 0           | 2.723293                | -0.622145 | -1.930490 |
| 31            | 1             | 0           | 4.926168                | -0.124851 | -0.923833 |
| 32            | 1             | 0           | 5.072258                | 1.269281  | 1.132237  |
| 33            | 1             | 0           | 2.993182                | 2.146107  | 2.177288  |
| 34            | 1             | 0           | 0.789099                | 1.627482  | 1.188612  |

The total electronic energy was calculated to be -1036.3294318 Hartree.

**Table S17.** Optimized structure of O=PPh<sub>3</sub> (B3LYP-D3/6-31G(d))

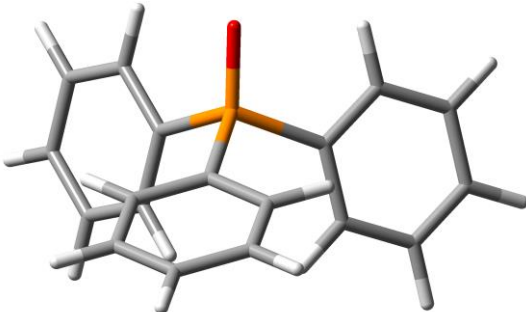

Standard orientation:

| Center Number | Atomic Number | Atomic Type | Coordinates (Angstroms) |           |           |
|---------------|---------------|-------------|-------------------------|-----------|-----------|
|               |               |             | X                       | Y         | Z         |
| 1             | 15            | 0           | -0.007288               | 0.038031  | 0.942486  |
| 2             | 8             | 0           | -0.031066               | 0.194847  | 2.438172  |
| 3             | 6             | 0           | 1.350315                | 0.995496  | 0.177474  |
| 4             | 6             | 0           | 0.203401                | -1.669166 | 0.322657  |
| 5             | 6             | 0           | -1.549877               | 0.649296  | 0.172692  |
| 6             | 6             | 0           | -2.466105               | 1.295544  | 1.011851  |
| 7             | 6             | 0           | -3.650944               | 1.815084  | 0.486744  |
| 8             | 6             | 0           | -3.925475               | 1.690924  | -0.876103 |
| 9             | 6             | 0           | -3.015671               | 1.043289  | -1.717277 |
| 10            | 6             | 0           | -1.831935               | 0.523967  | -1.195672 |
| 11            | 6             | 0           | 1.992643                | 1.942057  | 0.986070  |
| 12            | 6             | 0           | 3.010502                | 2.738785  | 0.459104  |
| 13            | 6             | 0           | 3.391916                | 2.593711  | -0.875941 |
| 14            | 6             | 0           | 2.758933                | 1.645986  | -1.685267 |
| 15            | 6             | 0           | 1.742480                | 0.848359  | -1.161283 |
| 16            | 6             | 0           | 1.490313                | -2.217965 | 0.207033  |
| 17            | 6             | 0           | 1.658028                | -3.549239 | -0.172330 |
| 18            | 6             | 0           | 0.542441                | -4.347132 | -0.436446 |
| 19            | 6             | 0           | -0.741667               | -3.812057 | -0.316538 |
| 20            | 6             | 0           | -0.911559               | -2.480516 | 0.063123  |
| 21            | 1             | 0           | -2.237611               | 1.377613  | 2.070410  |
| 22            | 1             | 0           | -4.359427               | 2.314404  | 1.142216  |
| 23            | 1             | 0           | -4.848047               | 2.095117  | -1.284451 |
| 24            | 1             | 0           | -3.230685               | 0.941476  | -2.777668 |
| 25            | 1             | 0           | -1.136190               | 0.010407  | -1.853498 |
| 26            | 1             | 0           | 1.690108                | 2.034379  | 2.025086  |
| 27            | 1             | 0           | 3.507116                | 3.469703  | 1.091577  |
| 28            | 1             | 0           | 4.184872                | 3.213644  | -1.285969 |
| 29            | 1             | 0           | 3.061232                | 1.525488  | -2.722174 |
| 30            | 1             | 0           | 1.270502                | 0.098944  | -1.790721 |

|    |   |   |           |           |           |
|----|---|---|-----------|-----------|-----------|
| 31 | 1 | 0 | 2.361528  | -1.601064 | 0.407752  |
| 32 | 1 | 0 | 2.658599  | -3.963328 | -0.262766 |
| 33 | 1 | 0 | 0.673913  | -5.383978 | -0.734406 |
| 34 | 1 | 0 | -1.611575 | -4.430881 | -0.519334 |

|    |   |   |           |           |          |
|----|---|---|-----------|-----------|----------|
| 35 | 1 | 0 | -1.912905 | -2.069706 | 0.151943 |
|----|---|---|-----------|-----------|----------|

-----  
The total electronic energy was calculated to be -1111.585595 Hartree.

**Table S18.** Optimized structure of INT2a (B3LYP-D3/6-31G(d))

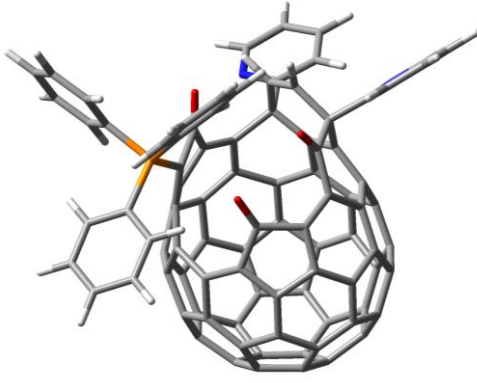

Standard orientation:

| Center Number | Atomic Number | Atomic Type | Coordinates (Angstroms) |           |           |
|---------------|---------------|-------------|-------------------------|-----------|-----------|
|               |               |             | X                       | Y         | Z         |
| 1             | 6             | 0           | -5.100983               | -1.492735 | 1.671510  |
| 2             | 6             | 0           | -4.763022               | -0.080101 | 1.753793  |
| 3             | 6             | 0           | -4.855203               | 0.710939  | 0.620616  |
| 4             | 6             | 0           | -5.273720               | 0.140370  | -0.646740 |
| 5             | 6             | 0           | -5.558631               | -1.222805 | -0.739069 |
| 6             | 6             | 0           | -5.473049               | -2.056678 | 0.446173  |
| 7             | 6             | 0           | -3.645453               | 0.089413  | 2.663601  |
| 8             | 6             | 0           | -3.837521               | 1.699203  | 0.372279  |
| 9             | 6             | 0           | -4.495882               | 0.791260  | -1.676731 |
| 10            | 6             | 0           | -5.061787               | -1.987911 | -1.870679 |
| 11            | 6             | 0           | -4.917713               | -3.338774 | 0.050029  |
| 12            | 6             | 0           | -4.223565               | -2.205775 | 2.571459  |
| 13            | 6             | 0           | -4.314902               | -1.351745 | -2.867024 |
| 14            | 6             | 0           | -4.030429               | 0.070746  | -2.769323 |
| 15            | 6             | 0           | -3.135195               | -1.994395 | -3.407515 |
| 16            | 6             | 0           | -2.683336               | 0.312070  | -3.239069 |
| 17            | 6             | 0           | -2.619853               | 1.035599  | 2.417496  |
| 18            | 6             | 0           | -3.631298               | 1.770121  | -1.057053 |
| 19            | 6             | 0           | -2.142773               | -0.964150 | -3.636287 |
| 20            | 6             | 0           | -2.368105               | 2.079986  | -1.556356 |
| 21            | 6             | 0           | -2.755433               | 1.889040  | 1.240024  |
| 22            | 6             | 0           | -4.649383               | -3.290910 | -1.377982 |
| 23            | 6             | 0           | -4.040510               | -4.012622 | 0.903802  |
| 24            | 6             | 0           | -1.249084               | 0.730654  | 2.846114  |
| 25            | 6             | 0           | -3.702180               | -3.450590 | 2.199322  |
| 26            | 6             | 0           | -3.363599               | -1.224916 | 3.214154  |
| 27            | 6             | 0           | -2.842452               | -4.638351 | 0.369581  |
| 28            | 6             | 0           | -2.316112               | -3.774762 | 2.483624  |
| 29            | 6             | 0           | -2.059039               | -1.551616 | 3.531410  |
| 30            | 6             | 0           | -1.847234               | 1.295730  | -2.674551 |
| 31            | 6             | 0           | -3.498653               | -3.901996 | -1.890955 |
| 32            | 6             | 0           | -1.586182               | 2.553039  | 0.707221  |
| 33            | 6             | 0           | -1.770382               | -4.460522 | 1.330399  |
| 34            | 6             | 0           | -1.514213               | -2.855585 | 3.157577  |
| 35            | 6             | 0           | -1.028474               | -0.556736 | 3.370840  |
| 36            | 6             | 0           | 0.152896                | -1.262771 | 2.978036  |
| 37            | 6             | 0           | -0.113049               | 1.470968  | 2.282506  |
| 38            | 6             | 0           | -1.421118               | 2.685664  | -0.649696 |
| 39            | 6             | 0           | 0.467710                | 2.195776  | -2.217891 |
| 40            | 6             | 0           | -0.147246               | -2.646438 | 2.758481  |
| 41            | 6             | 0           | 0.353683                | -3.210024 | 1.577390  |
| 42            | 6             | 0           | 1.240773                | -2.506646 | 0.652501  |
| 43            | 6             | 0           | -0.479125               | -4.149061 | 0.874101  |
| 44            | 6             | 0           | -2.724496               | -3.234074 | -2.916011 |
| 45            | 6             | 0           | 2.379546                | 1.021660  | 1.244494  |
| 46            | 6             | 0           | -2.567632               | -4.569763 | -0.993081 |
| 47            | 6             | 0           | -1.218565               | -4.272079 | -1.446322 |
| 48            | 6             | 0           | 1.071637                | 0.786479  | 2.019931  |
| 49            | 6             | 0           | -0.406158               | 1.101527  | -2.718395 |
| 50            | 6             | 0           | 0.086304                | -0.175792 | -2.989625 |
| 51            | 6             | 0           | 1.068895                | -0.634924 | 2.192529  |
| 52            | 6             | 0           | 1.785980                | -1.272496 | 1.091198  |
| 53            | 6             | 0           | -0.195978               | -4.006472 | -0.528065 |
| 54            | 6             | 0           | 0.816682                | -2.950150 | -0.719285 |
| 55            | 6             | 0           | 2.701606                | -0.266529 | 0.620209  |
| 56            | 6             | 0           | -1.317049               | -3.482803 | -2.637216 |
| 57            | 6             | 0           | -0.798973               | -1.211858 | -3.385115 |
| 58            | 6             | 0           | 1.281022                | -0.882339 | -2.353711 |
| 59            | 6             | 0           | -0.374176               | -2.481443 | -2.820516 |
| 60            | 6             | 0           | 0.741905                | -2.249037 | -1.937319 |
| 61            | 6             | 0           | -0.466005               | 2.855142  | 1.701434  |
| 62            | 6             | 0           | -0.178604               | 3.263943  | -1.286198 |
| 63            | 6             | 0           | 0.846946                | 3.698622  | -0.268580 |
| 64            | 6             | 0           | 0.711511                | 3.524809  | 1.041788  |
| 65            | 6             | 0           | -0.573677               | 4.519035  | -2.105866 |
| 66            | 6             | 0           | -0.977293               | 3.829797  | 2.780009  |
| 67            | 8             | 0           | 1.635863                | 2.290888  | -2.556138 |
| 68            | 8             | 0           | 3.081944                | 2.032591  | 1.224680  |
| 69            | 6             | 0           | -1.662977               | 4.986115  | 2.379054  |
| 70            | 6             | 0           | -2.089519               | 5.875879  | 3.359115  |
| 71            | 6             | 0           | -1.812566               | 5.589147  | 4.698257  |
| 72            | 6             | 0           | -1.109184               | 4.422027  | 4.988913  |
| 73            | 7             | 0           | -0.693663               | 3.553608  | 4.055693  |
| 74            | 7             | 0           | -1.532796               | 5.272273  | -1.546220 |
| 75            | 6             | 0           | -1.899492               | 6.395194  | -2.170231 |
| 76            | 6             | 0           | -1.337699               | 6.830381  | -3.371782 |
| 77            | 6             | 0           | -0.332395               | 6.051819  | -3.940611 |
| 78            | 6             | 0           | 0.062713                | 4.877849  | -3.298862 |
| 79            | 8             | 0           | 2.414451                | -0.471218 | -2.249893 |
| 80            | 15            | 0           | 4.343288                | -0.589995 | 0.094948  |
| 81            | 6             | 0           | 5.460680                | -0.230715 | 1.506017  |
| 82            | 6             | 0           | 5.002107                | 0.341328  | -1.317464 |
| 83            | 6             | 0           | 4.502267                | -2.373352 | -0.251482 |
| 84            | 6             | 0           | 4.468301                | 1.597636  | -1.628336 |
| 85            | 6             | 0           | 4.991050                | 2.320073  | -2.698663 |
| 86            | 6             | 0           | 6.048177                | 1.805154  | -3.450493 |
| 87            | 6             | 0           | 6.584998                | 0.554153  | -3.137701 |
| 88            | 6             | 0           | 6.060935                | -0.182753 | -2.075803 |
| 89            | 6             | 0           | 6.804200                | 0.113199  | 1.302188  |
| 90            | 6             | 0           | 7.643737                | 0.329168  | 2.394770  |
| 91            | 6             | 0           | 7.150017                | 0.207763  | 3.694933  |
| 92            | 6             | 0           | 5.810923                | -0.128259 | 3.902748  |
| 93            | 6             | 0           | 4.967039                | -0.345029 | 2.814374  |
| 94            | 6             | 0           | 4.215385                | -2.883071 | -1.527052 |
| 95            | 6             | 0           | 4.255769                | -4.258598 | -1.749720 |
| 96            | 6             | 0           | 4.574213                | -5.131934 | -0.708343 |
| 97            | 6             | 0           | 4.863532                | -4.627283 | 0.560600  |

|     |   |   |           |           |           |     |   |   |          |           |           |
|-----|---|---|-----------|-----------|-----------|-----|---|---|----------|-----------|-----------|
| 98  | 6 | 0 | 4.832442  | -3.252721 | 0.790262  | 112 | 1 | 0 | 7.402802 | 0.145583  | -3.724881 |
| 99  | 1 | 0 | 1.745462  | 4.152680  | -0.672523 | 113 | 1 | 0 | 6.466742 | -1.165044 | -1.851349 |
| 100 | 1 | 0 | 1.508075  | 3.827914  | 1.710725  | 114 | 1 | 0 | 7.193155 | 0.227605  | 0.295819  |
| 101 | 1 | 0 | -1.843577 | 5.168399  | 1.322637  | 115 | 1 | 0 | 8.682362 | 0.601057  | 2.228233  |
| 102 | 1 | 0 | -2.629105 | 6.778647  | 3.084980  | 116 | 1 | 0 | 7.805108 | 0.382381  | 4.544043  |
| 103 | 1 | 0 | -2.129459 | 6.253847  | 5.496381  | 117 | 1 | 0 | 5.417774 | -0.212199 | 4.911875  |
| 104 | 1 | 0 | -0.864176 | 4.164948  | 6.018164  | 118 | 1 | 0 | 3.923026 | -0.590455 | 2.981876  |
| 105 | 1 | 0 | -2.682344 | 6.974733  | -1.683780 | 119 | 1 | 0 | 3.942744 | -2.207110 | -2.327576 |
| 106 | 1 | 0 | -1.678045 | 7.749492  | -3.838772 | 120 | 1 | 0 | 4.025648 | -4.647168 | -2.737634 |
| 107 | 1 | 0 | 0.141289  | 6.349627  | -4.872218 | 121 | 1 | 0 | 4.595932 | -6.203829 | -0.884847 |
| 108 | 1 | 0 | 0.850955  | 4.260412  | -3.712365 | 122 | 1 | 0 | 5.113325 | -5.302184 | 1.374215  |
| 109 | 1 | 0 | 3.645258  | 1.999057  | -1.053730 | 123 | 1 | 0 | 5.059959 | -2.869140 | 1.779369  |
| 110 | 1 | 0 | 4.551828  | 3.280311  | -2.951007 |     |   |   |          |           |           |
| 111 | 1 | 0 | 6.449517  | 2.372765  | -4.285937 |     |   |   |          |           |           |

-----  
The total electronic energy was calculated to be -4197.3576688 Hartree.

**Table S19.** Optimized structure of **INT2b** (B3LYP-D3/6-31G(d))

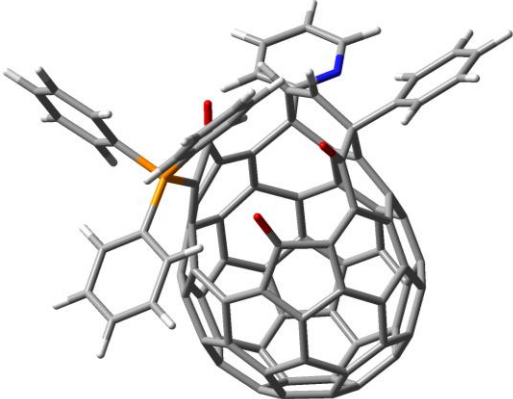

Standard orientation:

| Center Number | Atomic Number | Atomic Type | Coordinates (Angstroms) |           |           |
|---------------|---------------|-------------|-------------------------|-----------|-----------|
|               |               |             | X                       | Y         | Z         |
| 1             | 6             | 0           | -5.081352               | -1.532881 | 1.691268  |
| 2             | 6             | 0           | -4.755345               | -0.117011 | 1.771028  |
| 3             | 6             | 0           | -4.853590               | 0.670889  | 0.636129  |
| 4             | 6             | 0           | -5.270222               | 0.094716  | -0.629513 |
| 5             | 6             | 0           | -5.544987               | -1.270649 | -0.718950 |
| 6             | 6             | 0           | -5.450538               | -2.101906 | 0.467580  |
| 7             | 6             | 0           | -3.636758               | 0.062978  | 2.676942  |
| 8             | 6             | 0           | -3.845582               | 1.668055  | 0.384570  |
| 9             | 6             | 0           | -4.499875               | 0.750150  | -1.661972 |
| 10            | 6             | 0           | -5.044970               | -2.033884 | -1.850307 |
| 11            | 6             | 0           | -4.885556               | -3.380094 | 0.072347  |
| 12            | 6             | 0           | -4.196418               | -2.237729 | 2.590162  |
| 13            | 6             | 0           | -4.304938               | -1.393362 | -2.848940 |
| 14            | 6             | 0           | -4.031620               | 0.031383  | -2.754440 |
| 15            | 6             | 0           | -3.121411               | -2.027510 | -3.391283 |
| 16            | 6             | 0           | -2.687899               | 0.282476  | -3.228067 |
| 17            | 6             | 0           | -2.620912               | 1.018758  | 2.426697  |
| 18            | 6             | 0           | -3.641770               | 1.736806  | -1.045275 |
| 19            | 6             | 0           | -2.137886               | -0.989510 | -3.625434 |
| 20            | 6             | 0           | -2.380713               | 2.051930  | -1.545737 |
| 21            | 6             | 0           | -2.765206               | 1.872710  | 1.250951  |
| 22            | 6             | 0           | -4.621035               | -3.332649 | -1.356514 |
| 23            | 6             | 0           | -4.001710               | -4.046243 | 0.925201  |
| 24            | 6             | 0           | -1.245865               | 0.721551  | 2.851069  |
| 25            | 6             | 0           | -3.665156               | -3.478743 | 2.218745  |
| 26            | 6             | 0           | -3.342173               | -1.249048 | 3.228040  |
| 27            | 6             | 0           | -2.799700               | -4.662793 | 0.389263  |
| 28            | 6             | 0           | -2.276198               | -3.791643 | 2.501085  |
| 29            | 6             | 0           | -2.035465               | -1.566028 | 3.545742  |
| 30            | 6             | 0           | -1.858285               | 1.272884  | -2.666276 |
| 31            | 6             | 0           | -3.466569               | -3.935132 | -1.871066 |
| 32            | 6             | 0           | -1.602759               | 2.546977  | 0.716556  |
| 33            | 6             | 0           | -1.726869               | -4.473834 | 1.347179  |
| 34            | 6             | 0           | -1.480537               | -2.866085 | 3.173114  |
| 35            | 6             | 0           | -1.013390               | -0.563376 | 3.379396  |
| 36            | 6             | 0           | 0.172908                | -1.260695 | 2.986511  |
| 37            | 6             | 0           | -0.115314               | 1.466865  | 2.280664  |
| 38            | 6             | 0           | -1.433989               | 2.664423  | -0.642171 |
| 39            | 6             | 0           | 0.448856                | 2.198971  | -2.219634 |
| 40            | 6             | 0           | -0.115787               | -2.647208 | 2.771457  |
| 41            | 6             | 0           | 0.386522                | -3.204938 | 1.588010  |
| 42            | 6             | 0           | 1.265974                | -2.495123 | 0.660103  |
| 43            | 6             | 0           | -0.439314               | -4.152483 | 0.887640  |
| 44            | 6             | 0           | -2.700164               | -3.263209 | -2.899324 |
| 45            | 6             | 0           | 2.391671                | 1.036877  | 1.261239  |
| 46            | 6             | 0           | -2.528022               | -4.593459 | -0.973936 |
| 47            | 6             | 0           | -1.182440               | -4.285747 | -1.430853 |
| 48            | 6             | 0           | 1.078269                | 0.792308  | 2.027461  |
| 49            | 6             | 0           | -0.416546               | 1.092758  | -2.714782 |
| 50            | 6             | 0           | 0.085737                | -0.180902 | -2.984117 |
| 51            | 6             | 0           | 1.085678                | -0.627863 | 2.200950  |
| 52            | 6             | 0           | 1.806220                | -1.258284 | 1.097132  |
| 53            | 6             | 0           | -0.159834               | -4.010132 | -0.515286 |
| 54            | 6             | 0           | 0.843029                | -2.946197 | -0.710876 |
| 55            | 6             | 0           | 2.716005                | -0.245167 | 0.628754  |
| 56            | 6             | 0           | -1.289982               | -3.499573 | -2.622840 |
| 57            | 6             | 0           | -0.791793               | -1.225462 | -3.376036 |
| 58            | 6             | 0           | 1.283608                | -0.873283 | -2.342129 |
| 59            | 6             | 0           | -0.355727               | -2.490692 | -2.810181 |
| 60            | 6             | 0           | 0.759145                | -2.246927 | -1.928625 |
| 61            | 6             | 0           | -0.478853               | 2.852958  | 1.704932  |
| 62            | 6             | 0           | -0.200601               | 3.259652  | -1.286441 |
| 63            | 6             | 0           | 0.826152                | 3.692706  | -0.272549 |
| 64            | 6             | 0           | 0.693789                | 3.528591  | 1.039185  |
| 65            | 6             | 0           | -0.627237               | 4.506878  | -2.103198 |
| 66            | 6             | 0           | -0.985301               | 3.825552  | 2.786986  |
| 67            | 8             | 0           | 1.611158                | 2.305412  | -2.571408 |
| 68            | 8             | 0           | 3.090141                | 2.050252  | 1.260541  |
| 69            | 6             | 0           | -0.565557               | 3.740675  | 4.117953  |
| 70            | 6             | 0           | -1.017199               | 4.697135  | 5.026110  |
| 71            | 6             | 0           | -1.869398               | 5.704377  | 4.576594  |
| 72            | 6             | 0           | -2.223359               | 5.709620  | 3.226347  |
| 73            | 7             | 0           | -1.794078               | 4.800325  | 2.345895  |
| 74            | 6             | 0           | -1.396911               | 5.478785  | -1.444902 |
| 75            | 6             | 0           | -1.803447               | 6.628362  | -2.117958 |
| 76            | 6             | 0           | -1.447090               | 6.826397  | -3.455109 |
| 77            | 6             | 0           | -0.672495               | 5.869106  | -4.107830 |

|     |    |   |           |           |           |     |   |   |           |           |           |
|-----|----|---|-----------|-----------|-----------|-----|---|---|-----------|-----------|-----------|
| 78  | 6  | 0 | -0.259421 | 4.714985  | -3.435309 | 103 | 1 | 0 | -2.250154 | 6.467309  | 5.248685  |
| 79  | 8  | 0 | 2.409360  | -0.446354 | -2.221618 | 104 | 1 | 0 | -2.882679 | 6.480319  | 2.830607  |
| 80  | 15 | 0 | 4.352868  | -0.557414 | 0.078584  | 105 | 1 | 0 | -1.668399 | 5.330327  | -0.402105 |
| 81  | 6  | 0 | 5.478075  | -0.240450 | 1.495077  | 106 | 1 | 0 | -2.400122 | 7.372203  | -1.596236 |
| 82  | 6  | 0 | 4.997612  | 0.414328  | -1.311252 | 107 | 1 | 0 | -1.767913 | 7.722007  | -3.980543 |
| 83  | 6  | 0 | 4.504652  | -2.330879 | -0.318182 | 108 | 1 | 0 | -0.383054 | 6.014990  | -5.145316 |
| 84  | 6  | 0 | 4.422417  | 1.652660  | -1.618358 | 109 | 1 | 0 | 0.357664  | 3.990882  | -3.955971 |
| 85  | 6  | 0 | 4.931407  | 2.403973  | -2.675490 | 110 | 1 | 0 | 3.576792  | 2.018493  | -1.053927 |
| 86  | 6  | 0 | 6.017007  | 1.935275  | -3.416566 | 111 | 1 | 0 | 4.457304  | 3.347612  | -2.926520 |
| 87  | 6  | 0 | 6.595525  | 0.701564  | -3.107982 | 112 | 1 | 0 | 6.407805  | 2.524699  | -4.241767 |
| 88  | 6  | 0 | 6.084863  | -0.064328 | -2.060489 | 113 | 1 | 0 | 7.434993  | 0.328606  | -3.688208 |
| 89  | 6  | 0 | 6.816326  | 0.127303  | 1.298600  | 114 | 1 | 0 | 6.522085  | -1.034283 | -1.840780 |
| 90  | 6  | 0 | 7.659090  | 0.312032  | 2.394513  | 115 | 1 | 0 | 7.198872  | 0.286066  | 0.296042  |
| 91  | 6  | 0 | 7.174539  | 0.134959  | 3.691597  | 116 | 1 | 0 | 8.693282  | 0.603070  | 2.233023  |
| 92  | 6  | 0 | 5.840494  | -0.224225 | 3.892901  | 117 | 1 | 0 | 7.832404  | 0.284370  | 4.543350  |
| 93  | 6  | 0 | 4.993225  | -0.408507 | 2.801168  | 118 | 1 | 0 | 5.454297  | -0.352185 | 4.900184  |
| 94  | 6  | 0 | 4.281375  | -2.798486 | -1.621957 | 119 | 1 | 0 | 3.952611  | -0.670940 | 2.964542  |
| 95  | 6  | 0 | 4.313967  | -4.167639 | -1.882895 | 120 | 1 | 0 | 4.064574  | -2.096540 | -2.416956 |
| 96  | 6  | 0 | 4.559926  | -5.075929 | -0.851933 | 121 | 1 | 0 | 4.134769  | -4.523618 | -2.893361 |
| 97  | 6  | 0 | 4.785368  | -4.613186 | 0.445708  | 122 | 1 | 0 | 4.575179  | -6.142466 | -1.058827 |
| 98  | 6  | 0 | 4.762569  | -3.245623 | 0.713488  | 123 | 1 | 0 | 4.978588  | -5.315336 | 1.251594  |
| 99  | 1  | 0 | 1.718752  | 4.153587  | -0.681411 | 124 | 1 | 0 | 4.940434  | -2.894185 | 1.724495  |
| 100 | 1  | 0 | 1.489916  | 3.844197  | 1.703174  |     |   |   |           |           |           |
| 101 | 1  | 0 | 0.094189  | 2.938609  | 4.431558  |     |   |   |           |           |           |
| 102 | 1  | 0 | -0.709655 | 4.652871  | 6.067461  |     |   |   |           |           |           |

The total electronic energy was calculated to be -4181.3206314 Hartree.

**Table S20.** Optimized structure of INT2c (B3LYP-D3/6-31G(d))

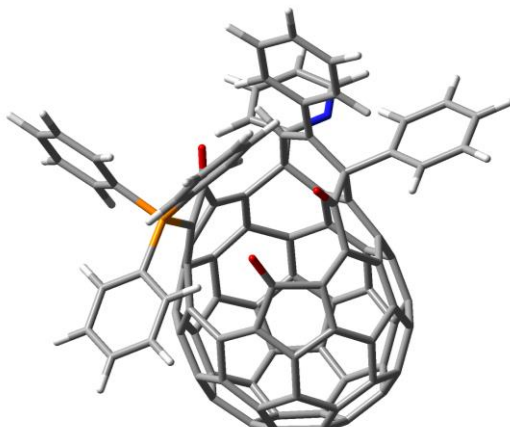

|    |   |   |           |           |           |    |   |   |           |           |           |
|----|---|---|-----------|-----------|-----------|----|---|---|-----------|-----------|-----------|
| 16 | 6 | 0 | -2.592614 | 1.218359  | -3.153394 | 16 | 6 | 0 | -2.592614 | 1.218359  | -3.153394 |
| 17 | 6 | 0 | -2.431513 | 1.462048  | 2.541484  | 17 | 6 | 0 | -2.431513 | 1.462048  | 2.541484  |
| 18 | 6 | 0 | -3.021934 | 2.751087  | -0.860947 | 18 | 6 | 0 | -3.021934 | 2.751087  | -0.860947 |
| 19 | 6 | 0 | -2.520551 | -0.133369 | -3.649259 | 19 | 6 | 0 | -2.520551 | -0.133369 | -3.649259 |
| 20 | 6 | 0 | -1.718743 | 2.621032  | -1.331368 | 20 | 6 | 0 | -1.718743 | 2.621032  | -1.331368 |
| 21 | 6 | 0 | -2.226178 | 2.393906  | 1.438055  | 21 | 6 | 0 | -2.226178 | 2.393906  | 1.438055  |
| 22 | 6 | 0 | -5.744578 | -1.587151 | -1.575920 | 22 | 6 | 0 | -5.744578 | -1.587151 | -1.575920 |
| 23 | 6 | 0 | -5.491901 | -2.641513 | 0.643319  | 23 | 6 | 0 | -5.491901 | -2.641513 | 0.643319  |
| 24 | 6 | 0 | -1.266890 | 0.660707  | 2.939898  | 24 | 6 | 0 | -1.266890 | 0.660707  | 2.939898  |
| 25 | 6 | 0 | -5.013663 | -2.329723 | 1.978519  | 25 | 6 | 0 | -5.013663 | -2.329723 | 1.978519  |
| 26 | 6 | 0 | -3.942055 | -0.445656 | 3.161012  | 26 | 6 | 0 | -3.942055 | -0.445656 | 3.161012  |
| 27 | 6 | 0 | -4.574409 | -3.607424 | 0.061806  | 27 | 6 | 0 | -4.574409 | -3.607424 | 0.061806  |
| 28 | 6 | 0 | -3.837880 | -3.140664 | 2.236942  | 28 | 6 | 0 | -3.837880 | -3.140664 | 2.236942  |
| 29 | 6 | 0 | -2.845876 | -1.233153 | 3.454149  | 29 | 6 | 0 | -2.845876 | -1.233153 | 3.454149  |
| 30 | 6 | 0 | -1.482120 | 1.798880  | -2.512120 | 30 | 6 | 0 | -1.482120 | 1.798880  | -2.512120 |
| 31 | 6 | 0 | -4.867582 | -2.524949 | -2.134874 | 31 | 6 | 0 | -4.867582 | -2.524949 | -2.134874 |
| 32 | 6 | 0 | -0.883681 | 2.636820  | 0.956893  | 32 | 6 | 0 | -0.883681 | 2.636820  | 0.956893  |
| 33 | 6 | 0 | -3.534457 | -3.887684 | 1.033540  | 33 | 6 | 0 | -3.534457 | -3.887684 | 1.033540  |
| 34 | 6 | 0 | -2.784254 | -2.615823 | 2.982158  | 34 | 6 | 0 | -2.784254 | -2.615823 | 2.982158  |
| 35 | 6 | 0 | -1.527306 | -0.656459 | 3.368759  | 35 | 6 | 0 | -1.527306 | -0.656459 | 3.368759  |
| 36 | 6 | 0 | -0.660671 | -1.706717 | 2.928233  | 36 | 6 | 0 | -0.660671 | -1.706717 | 2.928233  |
| 37 | 6 | 0 | 0.072968  | 0.986580  | 2.428380  | 37 | 6 | 0 | 0.072968  | 0.986580  | 2.428380  |
| 38 | 6 | 0 | -0.636557 | 2.780620  | -0.382270 | 38 | 6 | 0 | -0.636557 | 2.780620  | -0.382270 |
| 39 | 6 | 0 | 0.995415  | 1.819357  | -2.005231 | 39 | 6 | 0 | 0.995415  | 1.819357  | -2.005231 |
| 40 | 6 | 0 | -1.420793 | -2.875573 | 2.602333  | 40 | 6 | 0 | -1.420793 | -2.875573 | 2.602333  |
| 41 | 6 | 0 | -1.114389 | -3.487408 | 1.379079  | 41 | 6 | 0 | -1.114389 | -3.487408 | 1.379079  |
| 42 | 6 | 0 | -0.010414 | -3.074570 | 0.511780  | 42 | 6 | 0 | -0.010414 | -3.074570 | 0.511780  |
| 43 | 6 | 0 | -2.203696 | -4.018842 | 0.603825  | 43 | 6 | 0 | -2.203696 | -4.018842 | 0.603825  |
| 44 | 6 | 0 | -3.880676 | -2.099570 | -3.105127 | 44 | 6 | 0 | -3.880676 | -2.099570 | -3.105127 |
| 45 | 6 | 0 | 2.283210  | -0.247030 | 1.416666  | 45 | 6 | 0 | 2.283210  | -0.247030 | 1.416666  |
| 46 | 6 | 0 | -4.254269 | -3.540242 | -1.291046 | 46 | 6 | 0 | -4.254269 | -3.540242 | -1.291046 |
| 47 | 6 | 0 | -2.874420 | -3.703415 | -1.719159 | 47 | 6 | 0 | -2.874420 | -3.703415 | -1.719159 |
| 48 | 6 | 0 | 0.947052  | -0.055563 | 2.137474  | 48 | 6 | 0 | 0.947052  | -0.055563 | 2.137474  |
| 49 | 6 | 0 | -0.199050 | 1.123054  | -2.569404 | 49 | 6 | 0 | -0.199050 | 1.123054  | -2.569404 |
| 50 | 6 | 0 | -0.175470 | -0.223173 | -2.934428 | 50 | 6 | 0 | -0.175470 | -0.223173 | -2.934428 |
| 51 | 6 | 0 | 0.441656  | -1.391881 | 2.197959  | 51 | 6 | 0 | 0.441656  | -1.391881 | 2.197959  |
| 52 | 6 | 0 | 0.924587  | -2.152184 | 1.047178  | 52 | 6 | 0 | 0.924587  | -2.152184 | 1.047178  |
| 53 | 6 | 0 | -1.849188 | -3.882665 | -0.782797 | 53 | 6 | 0 | -1.849188 | -3.882665 | -0.782797 |

Standard orientation:

| Center Number | Atomic Number | Atomic Type | Coordinates (Angstroms) |           |           |
|---------------|---------------|-------------|-------------------------|-----------|-----------|
|               |               |             | X                       | Y         | Z         |
| 1             | 6             | 0           | -5.620845               | 0.028676  | 1.604600  |
| 2             | 6             | 0           | -4.811763               | 1.222821  | 1.797667  |
| 3             | 6             | 0           | -4.587166               | 2.074947  | 0.728613  |
| 4             | 6             | 0           | -5.143300               | 1.780965  | -0.579917 |
| 5             | 6             | 0           | -5.886303               | 0.616521  | -0.778408 |
| 6             | 6             | 0           | -6.131963               | -0.277903 | 0.338785  |
| 7             | 6             | 0           | -3.730126               | 0.920826  | 2.715115  |
| 8             | 6             | 0           | -3.282120               | 2.658126  | 0.558823  |
| 9             | 6             | 0           | -4.158843               | 2.189487  | -1.555996 |
| 10            | 6             | 0           | -5.659917               | -0.190432 | -1.965912 |
| 11            | 6             | 0           | -6.051072               | -1.640744 | -0.155558 |
| 12            | 6             | 0           | -5.075114               | -1.011306 | 2.446108  |
| 13            | 6             | 0           | -4.711210               | 0.212901  | -2.910520 |
| 14            | 6             | 0           | -3.949331               | 1.433339  | -2.702688 |
| 15            | 6             | 0           | -3.817088               | -0.762897 | -3.499608 |



|    |    |   |           |           |           |     |   |   |           |           |           |
|----|----|---|-----------|-----------|-----------|-----|---|---|-----------|-----------|-----------|
| 54 | 6  | 0 | -0.526349 | -3.239091 | -0.891137 | 96  | 6 | 0 | 6.922010  | -2.841845 | 2.468817  |
| 55 | 6  | 0 | 2.151024  | -1.496301 | 0.666867  | 97  | 6 | 0 | 6.366006  | -2.952783 | 3.744432  |
| 56 | 6  | 0 | -2.657239 | -2.844999 | -2.844260 | 98  | 6 | 0 | 4.984138  | -2.846062 | 3.912970  |
| 57 | 6  | 0 | -1.355903 | -0.852471 | -3.411548 | 99  | 6 | 0 | 4.159687  | -2.631389 | 2.809435  |
| 58 | 6  | 0 | 0.675056  | -1.342852 | -2.344186 | 100 | 6 | 0 | 2.806226  | -4.235693 | -1.812703 |
| 59 | 6  | 0 | -1.418614 | -2.227357 | -2.947614 | 101 | 6 | 0 | 2.374728  | -5.504404 | -2.197175 |
| 60 | 6  | 0 | -0.317576 | -2.466009 | -2.047716 | 102 | 6 | 0 | 2.260744  | -6.526202 | -1.253025 |
| 61 | 6  | 0 | 0.251365  | 2.445861  | 1.947738  | 103 | 6 | 0 | 2.589831  | -6.282017 | 0.081461  |
| 62 | 6  | 0 | 0.743251  | 2.989390  | -0.995656 | 104 | 6 | 0 | 3.030066  | -5.018774 | 0.472609  |
| 63 | 6  | 0 | 1.875863  | 3.015194  | 0.044195  | 105 | 1 | 0 | 2.393978  | 2.765375  | 2.059717  |
| 64 | 6  | 0 | 1.595656  | 2.740963  | 1.330264  | 106 | 1 | 0 | 0.692592  | 2.100555  | 4.684183  |
| 65 | 6  | 0 | 0.597374  | 4.354592  | -1.721641 | 107 | 1 | 0 | 0.533764  | 3.863977  | 6.450965  |
| 66 | 6  | 0 | 0.110322  | 3.455283  | 3.108296  | 108 | 1 | 0 | -0.158119 | 6.187238  | 5.773336  |
| 67 | 8  | 0 | 2.116000  | 1.502064  | -2.354763 | 109 | 1 | 0 | -0.626502 | 6.624409  | 3.356849  |
| 68 | 8  | 0 | 3.303989  | 0.429580  | 1.545438  | 110 | 1 | 0 | 0.488319  | 5.400453  | 0.158202  |
| 69 | 6  | 0 | 0.405180  | 3.115543  | 4.431835  | 111 | 1 | 0 | 0.189096  | 7.628886  | -0.882823 |
| 70 | 6  | 0 | 0.313375  | 4.101403  | 5.413668  | 112 | 1 | 0 | 0.081727  | 7.847526  | -3.361497 |
| 71 | 6  | 0 | -0.068109 | 5.389356  | 5.042593  | 113 | 1 | 0 | 0.287635  | 5.814650  | -4.782599 |
| 72 | 6  | 0 | -0.331049 | 5.631947  | 3.693024  | 114 | 1 | 0 | 0.623585  | 3.605986  | -3.749670 |
| 73 | 7  | 0 | -0.241488 | 4.696680  | 2.742869  | 115 | 1 | 0 | 5.127288  | 4.850297  | -2.815926 |
| 74 | 6  | 0 | 0.466075  | 5.499122  | -0.924185 | 116 | 1 | 0 | 2.844508  | 4.243933  | -2.273003 |
| 75 | 6  | 0 | 0.285519  | 6.748869  | -1.513274 | 117 | 1 | 0 | 4.189017  | 2.466344  | 1.405113  |
| 76 | 6  | 0 | 0.222795  | 6.872243  | -2.903598 | 118 | 1 | 0 | 6.472913  | 3.088525  | 0.867455  |
| 77 | 6  | 0 | 0.337729  | 5.733048  | -3.700049 | 119 | 1 | 0 | 6.997534  | 4.298876  | -1.253658 |
| 78 | 6  | 0 | 0.520368  | 4.479107  | -3.112774 | 120 | 1 | 0 | 3.809363  | 0.475872  | -0.765511 |
| 79 | 8  | 0 | 1.873304  | -1.353842 | -2.177590 | 121 | 1 | 0 | 5.199860  | 1.600759  | -2.436051 |
| 80 | 6  | 0 | 4.927474  | 4.342250  | -1.875741 | 122 | 1 | 0 | 6.788656  | 0.281865  | -3.841126 |
| 81 | 6  | 0 | 3.613828  | 3.998515  | -1.559021 | 123 | 1 | 0 | 6.935267  | -2.184022 | -3.559780 |
| 82 | 6  | 0 | 3.285957  | 3.350917  | -0.352772 | 124 | 1 | 0 | 5.514925  | -3.327356 | -1.889888 |
| 83 | 6  | 0 | 4.362345  | 3.034258  | 0.502777  | 125 | 1 | 0 | 6.545398  | -2.526787 | 0.376401  |
| 84 | 6  | 0 | 5.676244  | 3.367858  | 0.182797  | 126 | 1 | 0 | 7.997783  | -2.912278 | 2.334184  |
| 85 | 6  | 0 | 5.972616  | 4.035969  | -1.005082 | 127 | 1 | 0 | 7.008391  | -3.113757 | 4.605882  |
| 86 | 15 | 0 | 3.593643  | -2.311143 | 0.084022  | 128 | 1 | 0 | 4.546618  | -2.919464 | 4.904622  |
| 87 | 6  | 0 | 4.713076  | -2.529170 | 1.524076  | 129 | 1 | 0 | 3.087729  | -2.530288 | 2.948156  |
| 88 | 6  | 0 | 4.577536  | -1.496379 | -1.202065 | 130 | 1 | 0 | 2.871298  | -3.437599 | -2.540983 |
| 89 | 6  | 0 | 3.134212  | -3.986475 | -0.471487 | 131 | 1 | 0 | 2.117475  | -5.689432 | -3.236155 |
| 90 | 6  | 0 | 4.492608  | -0.108864 | -1.362592 | 132 | 1 | 0 | 1.916089  | -7.511004 | -1.556266 |
| 91 | 6  | 0 | 5.288253  | 0.526679  | -2.313926 | 133 | 1 | 0 | 2.505132  | -7.073952 | 0.820039  |
| 92 | 6  | 0 | 6.170482  | -0.216455 | -3.098845 | 134 | 1 | 0 | 3.288292  | -4.838858 | 1.511012  |
| 93 | 6  | 0 | 6.255958  | -1.602836 | -2.942092 |     |   |   |           |           |           |
| 94 | 6  | 0 | 5.458998  | -2.247725 | -1.997138 |     |   |   |           |           |           |
| 95 | 6  | 0 | 6.101552  | -2.629720 | 1.360873  |     |   |   |           |           |           |

The total electronic energy was calculated to be -4412.3872692 Hartree.

**Table S21.** Optimized structure of INT2d (B3LYP-D3/6-31G(d))

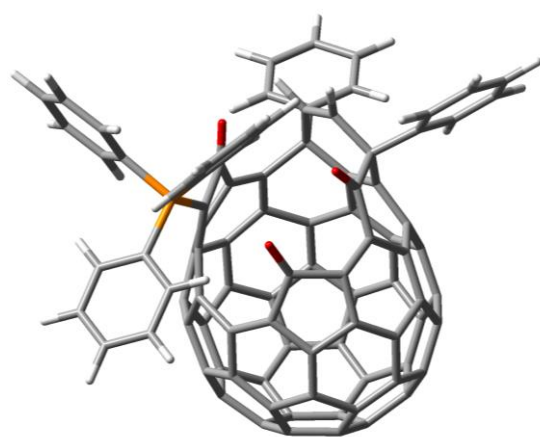

Standard orientation:

Center Atomic Atomic Coordinates (Angstroms)

| Number | Number | Type | X         | Y         | Z         |
|--------|--------|------|-----------|-----------|-----------|
| 1      | 6      | 0    | -5.128371 | -1.445191 | 1.663124  |
| 2      | 6      | 0    | -4.777876 | -0.036071 | 1.755423  |
| 3      | 6      | 0    | -4.861921 | 0.763869  | 0.627780  |
| 4      | 6      | 0    | -5.283074 | 0.205190  | -0.644119 |
| 5      | 6      | 0    | -5.581214 | -1.154381 | -0.745976 |
| 6      | 6      | 0    | -5.504838 | -1.996990 | 0.433825  |
| 7      | 6      | 0    | -3.657832 | 0.116469  | 2.664933  |
| 8      | 6      | 0    | -3.835839 | 1.745878  | 0.388073  |
| 9      | 6      | 0    | -4.496397 | 0.854348  | -1.668278 |
| 10     | 6      | 0    | -5.090998 | -1.916952 | -1.882152 |
| 11     | 6      | 0    | -4.962569 | -3.282104 | 0.029331  |
| 12     | 6      | 0    | -4.257301 | -2.172977 | 2.557408  |
| 13     | 6      | 0    | -4.335211 | -1.282029 | -2.872665 |
| 14     | 6      | 0    | -4.034543 | 0.136105  | -2.763514 |
| 15     | 6      | 0    | -3.162356 | -1.934084 | -3.416635 |
| 16     | 6      | 0    | -2.682959 | 0.365109  | -3.226970 |
| 17     | 6      | 0    | -2.625797 | 1.056493  | 2.424880  |
| 18     | 6      | 0    | -3.623435 | 1.820178  | -1.040747 |
| 19     | 6      | 0    | -2.157374 | -0.913405 | -3.635582 |

|    |   |   |           |           |           |     |    |   |           |           |           |
|----|---|---|-----------|-----------|-----------|-----|----|---|-----------|-----------|-----------|
| 20 | 6 | 0 | -2.354054 | 2.115617  | -1.532068 | 74  | 6  | 0 | -1.653872 | 5.268312  | -1.913318 |
| 21 | 6 | 0 | -2.755785 | 1.925953  | 1.259850  | 75  | 6  | 0 | -1.936777 | 6.402230  | -2.674274 |
| 22 | 6 | 0 | -4.693659 | -3.227872 | -1.398305 | 76  | 6  | 0 | -1.073260 | 6.796136  | -3.697445 |
| 23 | 6 | 0 | -4.093076 | -3.971309 | 0.878646  | 77  | 6  | 0 | 0.079052  | 6.049657  | -3.944925 |
| 24 | 6 | 0 | -1.255722 | 0.730612  | 2.839977  | 78  | 6  | 0 | 0.364178  | 4.915577  | -3.182692 |
| 25 | 6 | 0 | -3.748307 | -3.420493 | 2.177273  | 79  | 8  | 0 | 2.420098  | -0.515234 | -2.286196 |
| 26 | 6 | 0 | -3.386443 | -1.204956 | 3.204339  | 80  | 15 | 0 | 4.329984  | -0.639458 | 0.091458  |
| 27 | 6 | 0 | -2.902306 | -4.607151 | 0.340360  | 81  | 6  | 0 | 5.437478  | -0.268691 | 1.506800  |
| 28 | 6 | 0 | -2.365613 | -3.761024 | 2.459077  | 82  | 6  | 0 | 5.010986  | 0.267937  | -1.325043 |
| 29 | 6 | 0 | -2.085056 | -1.547002 | 3.518024  | 83  | 6  | 0 | 4.477358  | -2.429100 | -0.227634 |
| 30 | 6 | 0 | -1.836246 | 1.333077  | -2.651987 | 84  | 6  | 0 | 4.524684  | 1.546171  | -1.625005 |
| 31 | 6 | 0 | -3.550138 | -3.848724 | -1.915372 | 85  | 6  | 0 | 5.070025  | 2.253477  | -2.694364 |
| 32 | 6 | 0 | -1.580927 | 2.591742  | 0.737445  | 86  | 6  | 0 | 6.101983  | 1.701783  | -3.455031 |
| 33 | 6 | 0 | -1.827945 | -4.446610 | 1.301741  | 87  | 6  | 0 | 6.592398  | 0.429732  | -3.151068 |
| 34 | 6 | 0 | -1.553327 | -2.854253 | 3.137283  | 88  | 6  | 0 | 6.046298  | -0.292056 | -2.090000 |
| 35 | 6 | 0 | -1.045402 | -0.561641 | 3.356896  | 89  | 6  | 0 | 6.781286  | 0.075726  | 1.306359  |
| 36 | 6 | 0 | 0.128122  | -1.276849 | 2.958057  | 90  | 6  | 0 | 7.615561  | 0.300805  | 2.401252  |
| 37 | 6 | 0 | -0.114814 | 1.461905  | 2.270162  | 91  | 6  | 0 | 7.116252  | 0.187362  | 3.699915  |
| 38 | 6 | 0 | -1.406158 | 2.719813  | -0.622048 | 92  | 6  | 0 | 5.776832  | -0.150128 | 3.904198  |
| 39 | 6 | 0 | 0.491692  | 2.185816  | -2.147820 | 93  | 6  | 0 | 4.938187  | -0.375508 | 2.813651  |
| 40 | 6 | 0 | -0.184367 | -2.657635 | 2.737797  | 94  | 6  | 0 | 4.160172  | -2.957048 | -1.488786 |
| 41 | 6 | 0 | 0.310405  | -3.221764 | 1.554296  | 95  | 6  | 0 | 4.194548  | -4.335609 | -1.692440 |
| 42 | 6 | 0 | 1.205508  | -2.525005 | 0.632280  | 96  | 6  | 0 | 4.537339  | -5.194171 | -0.646453 |
| 43 | 6 | 0 | -0.533113 | -4.148772 | 0.846957  | 97  | 6  | 0 | 4.856655  | -4.671493 | 0.607841  |
| 44 | 6 | 0 | -2.767869 | -3.183031 | -2.935953 | 98  | 6  | 0 | 4.831618  | -3.293637 | 0.818597  |
| 45 | 6 | 0 | 2.370611  | 0.994523  | 1.222328  | 99  | 1  | 0 | 1.741772  | 4.212558  | -0.627757 |
| 46 | 6 | 0 | -2.626946 | -4.533179 | -1.021964 | 100 | 1  | 0 | 1.508340  | 3.866481  | 1.747638  |
| 47 | 6 | 0 | -1.274485 | -4.250228 | -1.474241 | 101 | 1  | 0 | -2.059478 | 5.062764  | 1.520403  |
| 48 | 6 | 0 | 1.061870  | 0.766345  | 2.000265  | 102 | 1  | 0 | -2.772078 | 6.653718  | 3.276263  |
| 49 | 6 | 0 | -0.397556 | 1.122175  | -2.689936 | 103 | 1  | 0 | -2.034213 | 6.324888  | 5.631787  |
| 50 | 6 | 0 | 0.080822  | -0.157088 | -2.977605 | 104 | 1  | 0 | -0.572573 | 4.392922  | 6.201818  |
| 51 | 6 | 0 | 1.047726  | -0.654715 | 2.171632  | 105 | 1  | 0 | 0.121115  | 2.799005  | 4.444487  |
| 52 | 6 | 0 | 1.761758  | -1.296280 | 1.071492  | 106 | 1  | 0 | -2.334538 | 4.974380  | -1.120744 |
| 53 | 6 | 0 | -0.248206 | -4.003634 | -0.554626 | 107 | 1  | 0 | -2.834801 | 6.977471  | -2.464789 |
| 54 | 6 | 0 | 0.777700  | -2.960189 | -0.741120 | 108 | 1  | 0 | -1.294972 | 7.677269  | -4.293433 |
| 55 | 6 | 0 | 2.685496  | -0.296852 | 0.600257  | 109 | 1  | 0 | 0.762658  | 6.347106  | -4.735829 |
| 56 | 6 | 0 | -1.363805 | -3.451067 | -2.659444 | 110 | 1  | 0 | 1.268046  | 4.350089  | -3.381975 |
| 57 | 6 | 0 | -0.817061 | -1.178795 | -3.386305 | 111 | 1  | 0 | 3.720953  | 1.976574  | -1.043661 |
| 58 | 6 | 0 | 1.273012  | -0.891144 | -2.365586 | 112 | 1  | 0 | 4.670435  | 3.233220  | -2.937942 |
| 59 | 6 | 0 | -0.408489 | -2.460319 | -2.836547 | 113 | 1  | 0 | 6.520569  | 2.258094  | -4.289566 |
| 60 | 6 | 0 | 0.711284  | -2.250792 | -1.953264 | 114 | 1  | 0 | 7.391599  | -0.006281 | -3.744074 |
| 61 | 6 | 0 | -0.456500 | 2.872355  | 1.737256  | 115 | 1  | 0 | 6.417392  | -1.288930 | -1.870603 |
| 62 | 6 | 0 | -0.159679 | 3.290789  | -1.258663 | 116 | 1  | 0 | 7.174237  | 0.182310  | 0.300616  |
| 63 | 6 | 0 | 0.850773  | 3.737897  | -0.231833 | 117 | 1  | 0 | 8.654463  | 0.573175  | 2.237542  |
| 64 | 6 | 0 | 0.717591  | 3.551378  | 1.077288  | 118 | 1  | 0 | 7.767280  | 0.368683  | 4.550719  |
| 65 | 6 | 0 | -0.504844 | 4.505877  | -2.162723 | 119 | 1  | 0 | 5.380192  | -0.229271 | 4.912397  |
| 66 | 6 | 0 | -0.937132 | 3.810095  | 2.864615  | 120 | 1  | 0 | 3.894090  | -0.623286 | 2.977709  |
| 67 | 8 | 0 | 1.679218  | 2.225221  | -2.419567 | 121 | 1  | 0 | 3.869219  | -2.291871 | -2.291925 |
| 68 | 8 | 0 | 3.073732  | 2.003962  | 1.205748  | 122 | 1  | 0 | 3.940938  | -4.738042 | -2.668971 |
| 69 | 6 | 0 | -1.744212 | 4.910329  | 2.549143  | 123 | 1  | 0 | 4.554838  | -6.268479 | -0.808080 |
| 70 | 6 | 0 | -2.139813 | 5.809315  | 3.538030  | 124 | 1  | 0 | 5.125850  | -5.334779 | 1.424825  |
| 71 | 6 | 0 | -1.724355 | 5.626441  | 4.859118  | 125 | 1  | 0 | 5.083236  | -2.896566 | 1.796398  |
| 72 | 6 | 0 | -0.906242 | 4.542458  | 5.178297  |     |    |   |           |           |           |
| 73 | 6 | 0 | -0.513578 | 3.641454  | 4.186450  |     |    |   |           |           |           |

-----  
The total electronic energy was calculated to be -4165.2812813 Hartree.

**Table S22.** Optimized structure of INT2e (B3LYP-D3/6-31G(d))

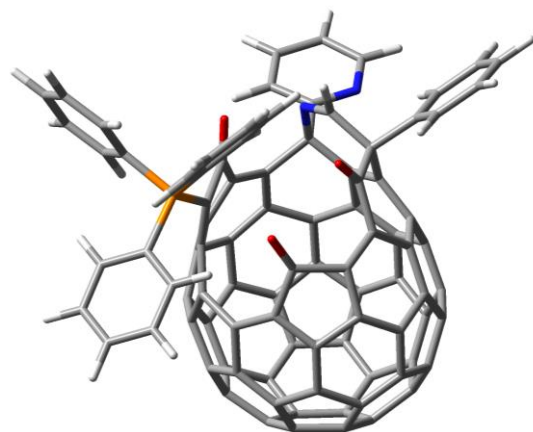

Standard orientation:

| Center Number | Atomic Number | Atomic Type | Coordinates (Angstroms) |           |           |
|---------------|---------------|-------------|-------------------------|-----------|-----------|
|               |               |             | X                       | Y         | Z         |
| 1             | 6             | 0           | -5.135526               | -1.423816 | 1.674627  |
| 2             | 6             | 0           | -4.794812               | -0.010358 | 1.730307  |
| 3             | 6             | 0           | -4.881212               | 0.758318  | 0.580679  |
| 4             | 6             | 0           | -5.293114               | 0.162526  | -0.677364 |
| 5             | 6             | 0           | -5.581593               | -1.201158 | -0.742904 |
| 6             | 6             | 0           | -5.505247               | -2.011085 | 0.459604  |
| 7             | 6             | 0           | -3.677796               | 0.172439  | 2.639022  |
| 8             | 6             | 0           | -3.863038               | 1.742009  | 0.318384  |
| 9             | 6             | 0           | -4.505185               | 0.788780  | -1.715263 |
| 10            | 6             | 0           | -5.082780               | -1.991048 | -1.856163 |
| 11            | 6             | 0           | -4.954753               | -3.303701 | 0.091918  |
| 12            | 6             | 0           | -4.263433               | -2.122504 | 2.590982  |
| 13            | 6             | 0           | -4.325295               | -1.378714 | -2.859641 |
| 14            | 6             | 0           | -4.032527               | 0.043539  | -2.787756 |
| 15            | 6             | 0           | -3.147473               | -2.039325 | -3.381337 |
| 16            | 6             | 0           | -2.679198               | 0.266479  | -3.250863 |
| 17            | 6             | 0           | -2.651505               | 1.113023  | 2.377753  |
| 18            | 6             | 0           | -3.642963               | 1.778782  | -1.111022 |
| 19            | 6             | 0           | -2.146305               | -1.019916 | -3.622031 |
| 20            | 6             | 0           | -2.372144               | 2.067119  | -1.606854 |
| 21            | 6             | 0           | -2.789688               | 1.951484  | 1.192301  |
| 22            | 6             | 0           | -4.680796               | -3.286496 | -1.335886 |
| 23            | 6             | 0           | -4.085199               | -3.965553 | 0.962553  |
| 24            | 6             | 0           | -1.276455               | 0.805444  | 2.799880  |
| 25            | 6             | 0           | -3.746806               | -3.377171 | 2.246524  |
| 26            | 6             | 0           | -3.399117               | -1.132732 | 3.212976  |
| 27            | 6             | 0           | -2.890006               | -4.610736 | 0.445701  |
| 28            | 6             | 0           | -2.363666               | -3.703419 | 2.541863  |
| 29            | 6             | 0           | -2.096207               | -1.458410 | 3.538068  |
| 30            | 6             | 0           | -1.839727               | 1.253447  | -2.696775 |
| 31            | 6             | 0           | -3.532620               | -3.915595 | -1.831851 |
| 32            | 6             | 0           | -1.619985               | 2.599560  | 0.653155  |
| 33            | 6             | 0           | -1.819847               | -4.419496 | 1.406150  |
| 34            | 6             | 0           | -1.557091               | -2.773214 | 3.195760  |
| 35            | 6             | 0           | -1.060711               | -0.472673 | 3.350657  |
| 36            | 6             | 0           | 0.116914                | -1.192366 | 2.974197  |
| 37            | 6             | 0           | -0.135127               | 1.519727  | 2.210817  |
| 38            | 6             | 0           | -1.433649               | 2.681543  | -0.701808 |
| 39            | 6             | 0           | 0.486794                | 2.129568  | -2.200350 |
| 40            | 6             | 0           | -0.188126               | -2.582025 | 2.795692  |
| 41            | 6             | 0           | 0.313161                | -3.180935 | 1.632156  |
| 42            | 6             | 0           | 1.210250                | -2.510482 | 0.694943  |
| 43            | 6             | 0           | -0.524450               | -4.130675 | 0.947914  |
| 44            | 6             | 0           | -2.749050               | -3.273244 | -2.866157 |
| 45            | 6             | 0           | 2.363298                | 1.029947  | 1.165755  |
| 46            | 6             | 0           | -2.609997               | -4.572440 | -0.917228 |
| 47            | 6             | 0           | -1.257067               | -4.296546 | -1.372420 |
| 48            | 6             | 0           | 1.049300                | 0.826430  | 1.957876  |
| 49            | 6             | 0           | -0.398520               | 1.046999  | -2.716474 |
| 50            | 6             | 0           | 0.085205                | -0.237001 | -2.973878 |
| 51            | 6             | 0           | 1.037623                | -0.588765 | 2.173112  |
| 52            | 6             | 0           | 1.760099                | -1.266959 | 1.098962  |
| 53            | 6             | 0           | -0.234873               | -4.022752 | -0.456186 |
| 54            | 6             | 0           | 0.788249                | -2.980957 | -0.666817 |
| 55            | 6             | 0           | 2.681383                | -0.287019 | 0.597074  |
| 56            | 6             | 0           | -1.344962               | -3.528744 | -2.578527 |
| 57            | 6             | 0           | -0.805655               | -1.272595 | -3.361278 |
| 58            | 6             | 0           | 1.279363                | -0.950873 | -2.343575 |
| 59            | 6             | 0           | -0.393120               | -2.538419 | -2.777478 |
| 60            | 6             | 0           | 0.723741                | -2.302727 | -1.897522 |
| 61            | 6             | 0           | -0.480130               | 2.901361  | 1.619373  |
| 62            | 6             | 0           | -0.159427               | 3.215266  | -1.299666 |
| 63            | 6             | 0           | 0.840406                | 3.611574  | -0.219723 |
| 64            | 7             | 0           | 0.707882                | 3.508392  | 1.035299  |
| 65            | 6             | 0           | -0.461185               | 4.498804  | -2.110376 |
| 66            | 6             | 0           | -0.943000               | 3.908043  | 2.688153  |
| 67            | 8             | 0           | 1.666728                | 2.196379  | -2.501274 |
| 68            | 8             | 0           | 3.066224                | 2.032778  | 1.090514  |
| 69            | 7             | 0           | -1.806681               | 4.837446  | 2.261828  |
| 70            | 6             | 0           | -2.197938               | 5.776054  | 3.131632  |
| 71            | 6             | 0           | -1.751483               | 5.835263  | 4.451685  |
| 72            | 6             | 0           | -0.840224               | 4.870586  | 4.882315  |
| 73            | 6             | 0           | -0.424340               | 3.889820  | 3.985077  |
| 74            | 6             | 0           | -1.254286               | 5.481964  | -1.497809 |
| 75            | 6             | 0           | -1.545429               | 6.667994  | -2.168517 |
| 76            | 6             | 0           | -1.049478               | 6.890034  | -3.455737 |
| 77            | 6             | 0           | -0.249480               | 5.921378  | -4.060461 |
| 78            | 6             | 0           | 0.050720                | 4.732372  | -3.390430 |
| 79            | 8             | 0           | 2.424379                | -0.565766 | -2.278086 |
| 80            | 15            | 0           | 4.328605                | -0.639990 | 0.103113  |
| 81            | 6             | 0           | 5.428670                | -0.223191 | 1.510974  |
| 82            | 6             | 0           | 5.019977                | 0.215449  | -1.341643 |
| 83            | 6             | 0           | 4.476764                | -2.438886 | -0.158843 |
| 84            | 6             | 0           | 4.538185                | 1.480955  | -1.697914 |
| 85            | 6             | 0           | 5.093801                | 2.144783  | -2.789634 |
| 86            | 6             | 0           | 6.132873                | 1.562525  | -3.517237 |
| 87            | 6             | 0           | 6.619466                | 0.303755  | -3.157272 |
| 88            | 6             | 0           | 6.062269                | -0.374906 | -2.073674 |
| 89            | 6             | 0           | 6.770736                | 0.125634  | 1.306779  |
| 90            | 6             | 0           | 7.598555                | 0.386256  | 2.398695  |
| 91            | 6             | 0           | 7.094673                | 0.303681  | 3.697877  |
| 92            | 6             | 0           | 5.756915                | -0.038169 | 3.905697  |
| 93            | 6             | 0           | 4.924561                | -0.298620 | 2.818216  |
| 94            | 6             | 0           | 4.156807                | -3.004239 | -1.403026 |
| 95            | 6             | 0           | 4.191278                | -4.388153 | -1.565952 |
| 96            | 6             | 0           | 4.537201                | -5.215082 | -0.495764 |
| 97            | 6             | 0           | 4.859547                | -4.655262 | 0.741566  |

|     |   |   |           |           |           |     |   |   |          |           |           |
|-----|---|---|-----------|-----------|-----------|-----|---|---|----------|-----------|-----------|
| 98  | 6 | 0 | 4.834212  | -3.271687 | 0.911584  | 112 | 1 | 0 | 7.424476 | -0.155847 | -3.724061 |
| 99  | 1 | 0 | 1.771454  | 4.037469  | -0.592448 | 113 | 1 | 0 | 6.430639 | -1.362201 | -1.810868 |
| 100 | 1 | 0 | -2.902514 | 6.513596  | 2.751353  | 114 | 1 | 0 | 7.167249 | 0.208035  | 0.300196  |
| 101 | 1 | 0 | -2.106133 | 6.616154  | 5.117529  | 115 | 1 | 0 | 8.635995 | 0.662286  | 2.231908  |
| 102 | 1 | 0 | -0.458865 | 4.882064  | 5.899785  | 116 | 1 | 0 | 7.740733 | 0.512623  | 4.546132  |
| 103 | 1 | 0 | 0.288400  | 3.125113  | 4.274152  | 117 | 1 | 0 | 5.356546 | -0.093114 | 4.914030  |
| 104 | 1 | 0 | -1.633716 | 5.317537  | -0.491836 | 118 | 1 | 0 | 3.881432 | -0.549082 | 2.984463  |
| 105 | 1 | 0 | -2.160518 | 7.420678  | -1.682463 | 119 | 1 | 0 | 3.864770 | -2.363302 | -2.225441 |
| 106 | 1 | 0 | -1.280854 | 7.813474  | -3.979821 | 120 | 1 | 0 | 3.935365 | -4.819469 | -2.529466 |
| 107 | 1 | 0 | 0.147870  | 6.086460  | -5.058498 | 121 | 1 | 0 | 4.554985 | -6.293709 | -0.625487 |
| 108 | 1 | 0 | 0.689483  | 3.999457  | -3.870349 | 122 | 1 | 0 | 5.131518 | -5.293942 | 1.577041  |
| 109 | 1 | 0 | 3.730994  | 1.935172  | -1.140606 | 123 | 1 | 0 | 5.088542 | -2.845593 | 1.876404  |
| 110 | 1 | 0 | 4.696799  | 3.113996  | -3.075654 |     |   |   |          |           |           |
| 111 | 1 | 0 | 6.560162  | 2.084762  | -4.369201 |     |   |   |          |           |           |

The total electronic energy was calculated to be -4197.3569035 Hartree.

**Table S23.** Optimized structure of INT2f (B3LYP-D3/6-31G(d))

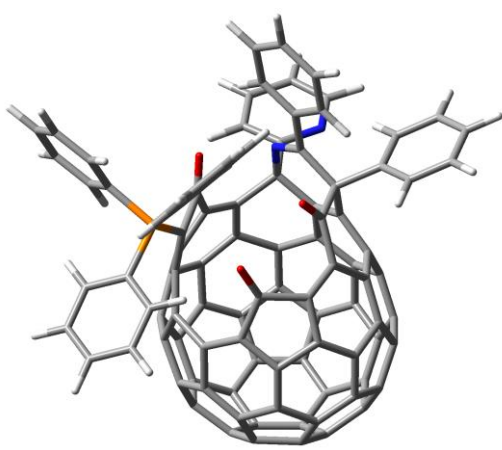

Standard orientation:

| Center Number | Atomic Number | Atomic Type | Coordinates (Angstroms) |           |           |    |   |   |           |           |           |
|---------------|---------------|-------------|-------------------------|-----------|-----------|----|---|---|-----------|-----------|-----------|
|               |               |             | X                       | Y         | Z         |    |   |   |           |           |           |
| 1             | 6             | 0           | -5.619851               | 0.184859  | 1.630865  | 27 | 6 | 0 | -4.640591 | -3.518117 | 0.203455  |
| 2             | 6             | 0           | -4.796063               | 1.375743  | 1.775816  | 28 | 6 | 0 | -3.871441 | -2.985727 | 2.352323  |
| 3             | 6             | 0           | -4.574967               | 2.190878  | 0.676935  | 29 | 6 | 0 | -2.837952 | -1.049459 | 3.486423  |
| 4             | 6             | 0           | -5.143500               | 1.857100  | -0.616434 | 30 | 6 | 0 | -1.489174 | 1.749866  | -2.562327 |
| 5             | 6             | 0           | -5.900697               | 0.695075  | -0.767947 | 31 | 6 | 0 | -4.939381 | -2.505824 | -2.025856 |
| 6             | 6             | 0           | -6.147700               | -0.157538 | 0.381224  | 32 | 6 | 0 | -0.872445 | 2.722812  | 0.859783  |
| 7             | 6             | 0           | -3.708096               | 1.090278  | 2.692393  | 33 | 6 | 0 | -3.594769 | -3.781109 | 1.173888  |
| 8             | 6             | 0           | -3.266661               | 2.756838  | 0.477188  | 34 | 6 | 0 | -2.799720 | -2.448185 | 3.063312  |
| 9             | 6             | 0           | -4.160355               | 2.218187  | -1.613021 | 35 | 6 | 0 | -1.513432 | -0.493296 | 3.361972  |
| 10            | 6             | 0           | -5.694093               | -0.154728 | -1.928554 | 36 | 6 | 0 | -0.665486 | -1.567375 | 2.944068  |
| 11            | 6             | 0           | -6.089826               | -1.537474 | -0.066943 | 37 | 6 | 0 | 0.091254  | 1.093397  | 2.344477  |
| 12            | 6             | 0           | -5.077968               | -0.833217 | 2.501454  | 38 | 6 | 0 | -0.632161 | 2.813648  | -0.482588 |
| 13            | 6             | 0           | -4.746519               | 0.202467  | -2.892971 | 39 | 6 | 0 | 0.988077  | 1.695943  | -2.004532 |
| 14            | 6             | 0           | -3.965110               | 1.417989  | -2.731761 | 40 | 6 | 0 | -1.444986 | -2.739977 | 2.676584  |
| 15            | 6             | 0           | -3.872149               | -0.805976 | -3.455138 | 41 | 6 | 0 | -1.163841 | -3.408398 | 1.477214  |
| 16            | 6             | 0           | -2.612527               | 1.165728  | -3.179454 | 42 | 6 | 0 | -0.064747 | -3.049506 | 0.583408  |
| 17            | 6             | 0           | -2.406616               | 1.611888  | 2.489423  | 43 | 6 | 0 | -2.271554 | -3.951098 | 0.734902  |
| 18            | 6             | 0           | -3.013582               | 2.793795  | -0.947114 | 44 | 6 | 0 | -3.954697 | -2.128537 | -3.018091 |
| 19            | 6             | 0           | -2.566522               | -0.202266 | -3.630721 | 45 | 6 | 0 | 2.267644  | -0.196293 | 1.300653  |
| 20            | 6             | 0           | -1.713866               | 2.631305  | -1.422271 | 46 | 6 | 0 | -4.334458 | -3.502694 | -1.154394 |
| 21            | 6             | 0           | -2.208595               | 2.512237  | 1.360088  | 47 | 6 | 0 | -2.962828 | -3.705262 | -1.591333 |
| 22            | 6             | 0           | -5.795883               | -1.536104 | -1.490892 | 48 | 6 | 0 | 0.950674  | 0.035389  | 2.061067  |
| 23            | 6             | 0           | -5.536696               | -2.518370 | 0.760360  | 49 | 6 | 0 | -0.220018 | 1.042044  | -2.588359 |
| 24            | 6             | 0           | -1.243544               | 0.806458  | 2.889780  | 50 | 6 | 0 | -0.219272 | -0.312078 | -2.927268 |
| 25            | 6             | 0           | -5.038828               | -2.167584 | 2.078875  | 51 | 6 | 0 | 0.428478  | -1.290845 | 2.183728  |
| 26            | 6             | 0           | -3.929386               | -0.258877 | 3.183212  | 52 | 6 | 0 | 0.885812  | -2.112045 | 1.064747  |
|               |               |             |                         |           |           | 53 | 6 | 0 | -1.931408 | -3.871934 | -0.659518 |
|               |               |             |                         |           |           | 54 | 6 | 0 | -0.598405 | -3.257219 | -0.804346 |
|               |               |             |                         |           |           | 55 | 6 | 0 | 2.108340  | -1.493066 | 0.630226  |
|               |               |             |                         |           |           | 56 | 6 | 0 | -2.742621 | -2.887742 | -2.746674 |
|               |               |             |                         |           |           | 57 | 6 | 0 | -1.411986 | -0.934021 | -3.383850 |
|               |               |             |                         |           |           | 58 | 6 | 0 | 0.624840  | -1.442566 | -2.341256 |
|               |               |             |                         |           |           | 59 | 6 | 0 | -1.494664 | -2.295535 | -2.882192 |
|               |               |             |                         |           |           | 60 | 6 | 0 | -0.388360 | -2.529663 | -1.989143 |
|               |               |             |                         |           |           | 61 | 6 | 0 | 0.282496  | 2.532760  | 1.826395  |
|               |               |             |                         |           |           | 62 | 6 | 0 | 0.761931  | 2.930015  | -1.071474 |
|               |               |             |                         |           |           | 63 | 6 | 0 | 1.849103  | 2.956530  | 0.033782  |
|               |               |             |                         |           |           | 64 | 7 | 0 | 1.598165  | 2.740011  | 1.267721  |
|               |               |             |                         |           |           | 65 | 6 | 0 | 0.749951  | 4.259137  | -1.862971 |
|               |               |             |                         |           |           | 66 | 6 | 0 | 0.205296  | 3.578538  | 2.960392  |
|               |               |             |                         |           |           | 67 | 8 | 0 | 2.103493  | 1.293353  | -2.275095 |
|               |               |             |                         |           |           | 68 | 8 | 0 | 3.289727  | 0.483162  | 1.332327  |
|               |               |             |                         |           |           | 69 | 6 | 0 | 0.578516  | 3.277959  | 4.272184  |
|               |               |             |                         |           |           | 70 | 6 | 0 | 0.544871  | 4.294819  | 5.224111  |
|               |               |             |                         |           |           | 71 | 6 | 0 | 0.145844  | 5.572424  | 4.832208  |
|               |               |             |                         |           |           | 72 | 6 | 0 | -0.192981 | 5.773590  | 3.493730  |
|               |               |             |                         |           |           | 73 | 7 | 0 | -0.164558 | 4.804904  | 2.571896  |
|               |               |             |                         |           |           | 74 | 6 | 0 | 0.651845  | 5.449206  | -1.129234 |
|               |               |             |                         |           |           | 75 | 6 | 0 | 0.597452  | 6.676564  | -1.786813 |

|     |    |   |          |           |           |     |   |   |           |           |           |
|-----|----|---|----------|-----------|-----------|-----|---|---|-----------|-----------|-----------|
| 76  | 6  | 0 | 0.627361 | 6.731567  | -3.182442 | 106 | 1 | 0 | 0.825584  | 4.092215  | 6.254177  |
| 77  | 6  | 0 | 0.707548 | 5.547983  | -3.915973 | 107 | 1 | 0 | 0.100645  | 6.393991  | 5.540624  |
| 78  | 6  | 0 | 0.766044 | 4.316427  | -3.260185 | 108 | 1 | 0 | -0.502121 | 6.756462  | 3.142276  |
| 79  | 8  | 0 | 1.828818 | -1.497370 | -2.237785 | 109 | 1 | 0 | 0.599001  | 5.407230  | -0.043682 |
| 80  | 6  | 0 | 5.091518 | 3.901796  | -1.792696 | 110 | 1 | 0 | 0.526665  | 7.592263  | -1.205934 |
| 81  | 6  | 0 | 3.748063 | 3.596568  | -1.573976 | 111 | 1 | 0 | 0.583610  | 7.689385  | -3.693643 |
| 82  | 6  | 0 | 3.281665 | 3.264736  | -0.291918 | 112 | 1 | 0 | 0.725729  | 5.577308  | -5.002144 |
| 83  | 6  | 0 | 4.215725 | 3.236313  | 0.761485  | 113 | 1 | 0 | 0.839279  | 3.405770  | -3.847239 |
| 84  | 6  | 0 | 5.557656 | 3.526352  | 0.539611  | 114 | 1 | 0 | 5.419847  | 4.165737  | -2.794901 |
| 85  | 6  | 0 | 6.004795 | 3.867244  | -0.739037 | 115 | 1 | 0 | 3.075927  | 3.614250  | -2.417133 |
| 86  | 15 | 0 | 3.532073 | -2.368907 | 0.089962  | 116 | 1 | 0 | 3.867194  | 2.955116  | 1.745546  |
| 87  | 6  | 0 | 4.680054 | -2.486196 | 1.517989  | 117 | 1 | 0 | 6.257976  | 3.483268  | 1.369581  |
| 88  | 6  | 0 | 4.520245 | -1.690321 | -1.273968 | 118 | 1 | 0 | 7.052391  | 4.100456  | -0.912298 |
| 89  | 6  | 0 | 3.035855 | -4.077941 | -0.313360 | 119 | 1 | 0 | 4.012568  | 0.364768  | -0.830746 |
| 90  | 6  | 0 | 4.582911 | -0.303438 | -1.461165 | 120 | 1 | 0 | 5.416117  | 1.291958  | -2.615913 |
| 91  | 6  | 0 | 5.386127 | 0.216703  | -2.474410 | 121 | 1 | 0 | 6.753256  | -0.222397 | -4.082310 |
| 92  | 6  | 0 | 6.130369 | -0.634340 | -3.292483 | 122 | 1 | 0 | 6.649915  | -2.683216 | -3.738090 |
| 93  | 6  | 0 | 6.074123 | -2.016920 | -3.101481 | 123 | 1 | 0 | 5.220935  | -3.625094 | -1.957956 |
| 94  | 6  | 0 | 5.269319 | -2.548937 | -2.094473 | 124 | 1 | 0 | 6.474229  | -2.625950 | 0.320871  |
| 95  | 6  | 0 | 6.060502 | -2.632573 | 1.323851  | 125 | 1 | 0 | 7.979107  | -2.875821 | 2.263775  |
| 96  | 6  | 0 | 6.909612 | -2.768632 | 2.421990  | 126 | 1 | 0 | 7.054453  | -2.856721 | 4.571251  |
| 97  | 6  | 0 | 6.389810 | -2.756046 | 3.717550  | 127 | 1 | 0 | 4.607408  | -2.583609 | 4.922035  |
| 98  | 6  | 0 | 5.015925 | -2.604690 | 3.915653  | 128 | 1 | 0 | 3.096898  | -2.335740 | 2.981009  |
| 99  | 6  | 0 | 4.162571 | -2.467703 | 2.821759  | 129 | 1 | 0 | 2.578554  | -3.662092 | -2.379613 |
| 100 | 6  | 0 | 2.587796 | -4.413168 | -1.600443 | 130 | 1 | 0 | 1.783956  | -5.954398 | -2.861594 |
| 101 | 6  | 0 | 2.134284 | -5.704732 | -1.864183 | 131 | 1 | 0 | 1.753931  | -7.668901 | -1.060530 |
| 102 | 6  | 0 | 2.116017 | -6.665883 | -0.852167 | 132 | 1 | 0 | 2.552275  | -7.080220 | 1.220077  |
| 103 | 6  | 0 | 2.562653 | -6.336434 | 0.428505  | 133 | 1 | 0 | 3.373142  | -4.804876 | 1.696858  |
| 104 | 6  | 0 | 3.025733 | -5.049629 | 0.698642  |     |   |   |           |           |           |
| 105 | 1  | 0 | 0.886529 | 2.271684  | 4.534050  |     |   |   |           |           |           |

-----  
The total electronic energy was calculated to be -4428.4291253 Hartree.

## 7. Mechanistic Studies on H<sub>2</sub>O-Insertion into INT1

The energy profile for H<sub>2</sub>O-insertion into **INT1** was calculated at the B3LYP-D3/6-31G(d) level of theory. The transition state **TS1f** was calculated under a fix option (C(7)⋯H(103) as 6.08077 Å) based on optimized structures of **TS1c** and **TS1e**.

**Table S24.** Change in Gibbs energies ( $\Delta G$ , kcal/mol) on a profile for H<sub>2</sub>O-insertion into **INT1** (B3LYP-D3/6-31G(d)) at 298 K)

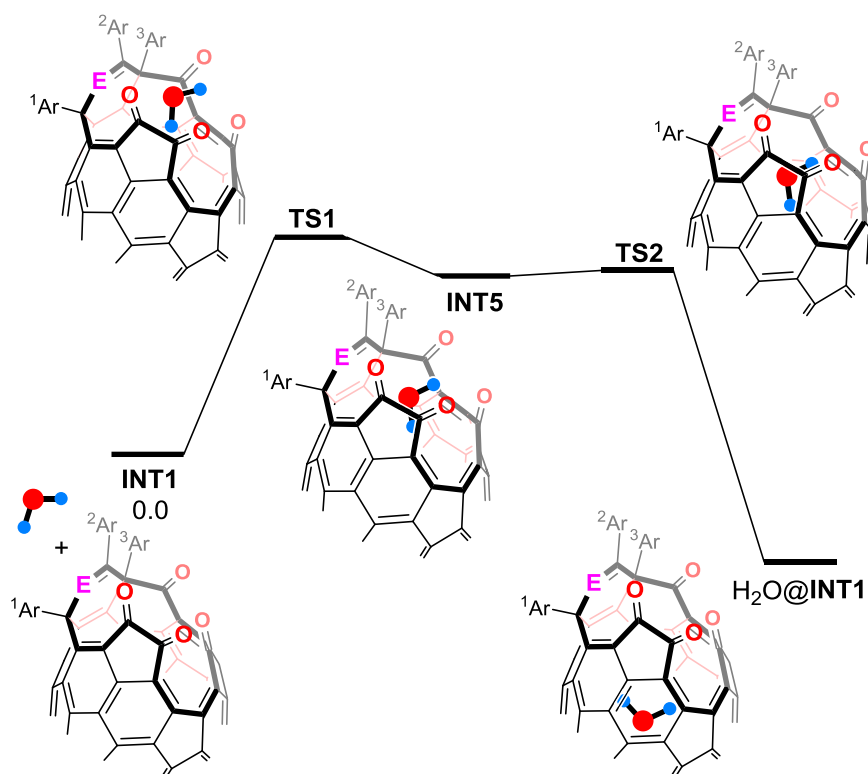

| Addends  | <b>TS1</b> | <b>INT5</b> | <b>TS2</b> | <b>H<sub>2</sub>O@INT1</b> |
|----------|------------|-------------|------------|----------------------------|
| <b>a</b> | +21.6      | +17.1       | +17.5      | -10.0                      |
| <b>b</b> | +21.7      | +17.2       | +17.6      | -9.3                       |
| <b>c</b> | +21.4      | +16.9       | +17.2      | -8.9                       |
| <b>d</b> | +22.0      | +17.5       | +18.2      | -9.7                       |
| <b>e</b> | +21.0      | +17.3       | +17.8      | -8.9                       |
| <b>f</b> | +21.0      | +17.3       | +17.8      | -10.4                      |

**Table S25.** Optimized structure of H<sub>2</sub>O (B3LYP-D3/6-31G(d))

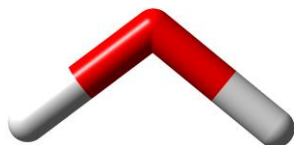

Standard orientation:

| Center Number | Atomic Number | Atomic Type | Coordinates (Angstroms) |           |           |
|---------------|---------------|-------------|-------------------------|-----------|-----------|
|               |               |             | X                       | Y         | Z         |
| 1             | 8             | 0           | 0.000000                | 0.000000  | 0.119774  |
| 2             | 1             | 0           | -0.000000               | 0.761454  | -0.479095 |
| 3             | 1             | 0           | -0.000000               | -0.761454 | -0.479095 |

The total electronic energy was calculated to be  $-76.4089616$  Hartree.

**Table S26.** Optimized structure of TS1a (B3LYP-D3/6-31G(d))

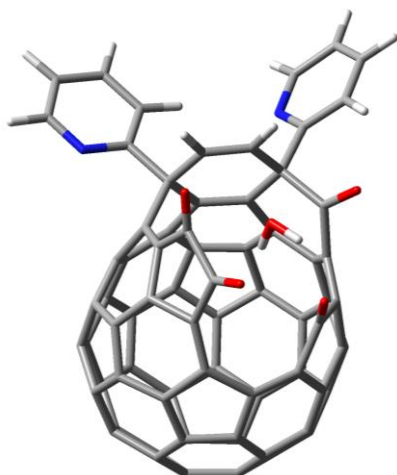

Standard orientation:

| Center Number | Atomic Number | Atomic Type | Coordinates (Angstroms) |           |           |
|---------------|---------------|-------------|-------------------------|-----------|-----------|
|               |               |             | X                       | Y         | Z         |
| 1             | 6             | 0           | -2.657692               | 1.533494  | -3.223125 |
| 2             | 6             | 0           | -1.205515               | 1.577618  | -3.270795 |
| 3             | 6             | 0           | -0.494721               | 0.413088  | -3.505819 |
| 4             | 6             | 0           | -1.188072               | -0.849391 | -3.695569 |
| 5             | 6             | 0           | -2.578992               | -0.903766 | -3.609020 |
| 6             | 6             | 0           | -3.329170               | 0.315672  | -3.364677 |
| 7             | 6             | 0           | -0.726954               | 2.524768  | -2.281745 |
| 8             | 6             | 0           | 0.716638                | 0.169128  | -2.768361 |
| 9             | 6             | 0           | -0.378634               | -1.871124 | -3.072128 |
| 10            | 6             | 0           | -3.213326               | -1.984234 | -2.871087 |
| 11            | 6             | 0           | -4.429280               | -0.009405 | -2.473135 |
| 12            | 6             | 0           | -3.090260               | 2.496380  | -2.233104 |
| 13            | 6             | 0           | -2.425752               | -2.970962 | -2.270167 |
| 14            | 6             | 0           | -0.978633               | -2.916150 | -2.379945 |
| 15            | 6             | 0           | -2.742274               | -3.432092 | -0.933124 |
| 16            | 6             | 0           | -0.399723               | -3.336281 | -1.123709 |
| 17            | 6             | 0           | 0.438762                | 2.278070  | -1.518689 |
| 18            | 6             | 0           | 0.809145                | -1.254505 | -2.528735 |
| 19            | 6             | 0           | -1.489304               | -3.654712 | -0.238027 |
| 20            | 6             | 0           | 1.431362                | -1.713975 | -1.373230 |
| 21            | 6             | 0           | 1.195461                | 1.065377  | -1.805385 |
| 22            | 6             | 0           | -4.347922               | -1.426014 | -2.156303 |
| 23            | 6             | 0           | -4.830071               | 0.905063  | -1.496724 |
| 24            | 6             | 0           | 0.516803                | 2.785231  | -0.141461 |
| 25            | 6             | 0           | -4.166005               | 2.193488  | -1.386829 |
| 26            | 6             | 0           | -1.906761               | 3.139778  | -1.697701 |
| 27            | 6             | 0           | -5.129310               | 0.444138  | -0.151455 |
| 28            | 6             | 0           | -4.094389               | 2.544377  | 0.015277  |
| 29            | 6             | 0           | -1.869970               | 3.535067  | -0.373078 |
| 30            | 6             | 0           | 0.784836                | -2.780446 | -0.610411 |
| 31            | 6             | 0           | -4.645481               | -1.868021 | -0.861725 |
| 32            | 6             | 0           | 2.130498                | 0.558526  | -0.823025 |
| 33            | 6             | 0           | -4.646480               | 1.439584  | 0.785007  |
| 34            | 6             | 0           | -2.990917               | 3.231027  | 0.507048  |
| 35            | 6             | 0           | -0.644966               | 3.390755  | 0.372757  |
| 36            | 6             | 0           | -1.025529               | 3.100602  | 1.724193  |
| 37            | 6             | 0           | 1.525507                | 2.267647  | 0.791047  |
| 38            | 6             | 0           | 2.291637                | -0.796441 | -0.659942 |
| 39            | 6             | 0           | 2.448240                | -2.483662 | 1.209607  |
| 40            | 6             | 0           | -2.429697               | 2.877450  | 1.790817  |
| 41            | 6             | 0           | -2.871180               | 1.739660  | 2.478635  |
| 42            | 6             | 0           | -1.972147               | 0.838473  | 3.188206  |
| 43            | 6             | 0           | -4.011925               | 1.031420  | 1.962174  |
| 44            | 6             | 0           | -3.821871               | -2.883976 | -0.242539 |
| 45            | 6             | 0           | 1.786299                | 1.681677  | 3.447392  |
| 46            | 6             | 0           | -5.020901               | -0.907027 | 0.165791  |
| 47            | 6             | 0           | -4.386431               | -1.310436 | 1.409530  |
| 48            | 6             | 0           | 1.189526                | 2.154026  | 2.137099  |
| 49            | 6             | 0           | 1.004751                | -2.755148 | 0.830070  |
| 50            | 6             | 0           | -0.102999               | -2.923139 | 1.670759  |
| 51            | 6             | 0           | -0.192181               | 2.349027  | 2.508570  |
| 52            | 6             | 0           | -0.655795               | 1.297265  | 3.384720  |
| 53            | 6             | 0           | -3.835583               | -0.361975 | 2.278144  |

|    |   |   |           |           |           |    |   |   |           |           |           |
|----|---|---|-----------|-----------|-----------|----|---|---|-----------|-----------|-----------|
| 54 | 6 | 0 | -2.562892 | -0.552958 | 2.989051  | 76 | 6 | 0 | 6.279287  | -3.590007 | -0.594668 |
| 55 | 6 | 0 | 0.564946  | 1.005855  | 4.220563  | 77 | 6 | 0 | 5.225947  | -3.070641 | 0.155542  |
| 56 | 6 | 0 | -3.673462 | -2.529774 | 1.160250  | 78 | 8 | 0 | 0.612897  | 0.522986  | 5.323524  |
| 57 | 6 | 0 | -1.354271 | -3.316376 | 1.100970  | 79 | 6 | 0 | -0.501315 | -2.242775 | 2.997618  |
| 58 | 6 | 0 | -2.464858 | -2.709689 | 1.810021  | 80 | 8 | 0 | 0.129936  | -2.099125 | 4.022963  |
| 59 | 6 | 0 | -1.936029 | -1.789203 | 2.785856  | 81 | 1 | 0 | 4.557932  | -0.770162 | 1.979198  |
| 60 | 6 | 0 | 2.749182  | 1.587231  | 0.127595  | 82 | 1 | 0 | 4.179299  | 1.607123  | 1.806109  |
| 61 | 6 | 0 | 3.232570  | -1.425323 | 0.340514  | 83 | 1 | 0 | 4.595455  | 1.069055  | -1.817762 |
| 62 | 6 | 0 | 3.891605  | -0.379799 | 1.218026  | 84 | 1 | 0 | 5.989631  | 2.743171  | -3.065739 |
| 63 | 6 | 0 | 3.684730  | 0.931711  | 1.115849  | 85 | 1 | 0 | 5.690108  | 5.186336  | -2.538840 |
| 64 | 6 | 0 | 4.387277  | -2.119369 | -0.438974 | 86 | 1 | 0 | 4.020956  | 5.828416  | -0.794684 |
| 65 | 6 | 0 | 3.584305  | 2.602294  | -0.678031 | 87 | 1 | 0 | 5.704647  | -1.794462 | -3.408344 |
| 66 | 8 | 0 | 2.988874  | -3.173207 | 2.048112  | 88 | 1 | 0 | 7.279493  | -3.522946 | -2.519082 |
| 67 | 8 | 0 | 2.860309  | 1.937378  | 3.928913  | 89 | 1 | 0 | 6.941407  | -4.333404 | -0.159193 |
| 68 | 6 | 0 | 4.501125  | 2.135613  | -1.630853 | 90 | 1 | 0 | 5.049046  | -3.393697 | 1.173219  |
| 69 | 6 | 0 | 5.272093  | 3.068075  | -2.316989 | 91 | 8 | 0 | 2.087207  | -0.694116 | 3.032831  |
| 70 | 6 | 0 | 5.109095  | 4.425084  | -2.027144 | 92 | 1 | 0 | 1.731877  | -1.322911 | 3.688849  |
| 71 | 6 | 0 | 4.176920  | 4.783178  | -1.055477 | 93 | 1 | 0 | 1.388805  | -0.630451 | 2.365926  |
| 72 | 7 | 0 | 3.424160  | 3.896240  | -0.388643 |    |   |   |           |           |           |
| 73 | 7 | 0 | 4.576206  | -1.675659 | -1.688935 |    |   |   |           |           |           |
| 74 | 6 | 0 | 5.592406  | -2.181567 | -2.397101 |    |   |   |           |           |           |
| 75 | 6 | 0 | 6.471187  | -3.143464 | -1.901587 |    |   |   |           |           |           |

-----

An imaginary frequency was found at  $-83.87\text{ cm}^{-1}$ .  
The total electronic energy was calculated to be  $-3312.6077607$  Hartree.

**Table S27.** Optimized structure of **TS1b** (B3LYP-D3/6-31G(d))

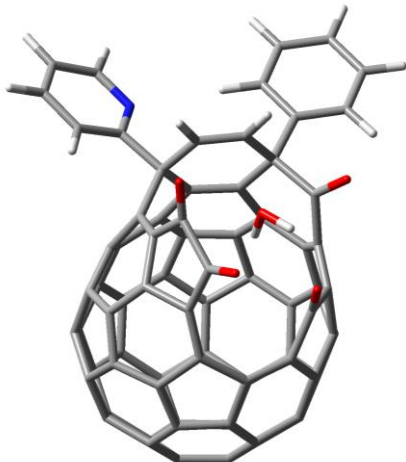

|    |   |   |           |           |           |    |   |   |           |           |           |
|----|---|---|-----------|-----------|-----------|----|---|---|-----------|-----------|-----------|
| 17 | 6 | 0 | 0.497617  | 2.001435  | -1.850509 | 17 | 6 | 0 | 0.497617  | 2.001435  | -1.850509 |
| 18 | 6 | 0 | 0.838919  | -1.646325 | -2.276523 | 18 | 6 | 0 | 0.838919  | -1.646325 | -2.276523 |
| 19 | 6 | 0 | -1.519960 | -3.628563 | 0.333258  | 19 | 6 | 0 | -1.519960 | -3.628563 | 0.333258  |
| 20 | 6 | 0 | 1.435523  | -1.917500 | -1.050900 | 20 | 6 | 0 | 1.435523  | -1.917500 | -1.050900 |
| 21 | 6 | 0 | 1.250951  | 0.756324  | -1.933102 | 21 | 6 | 0 | 1.250951  | 0.756324  | -1.933102 |
| 22 | 6 | 0 | -4.324874 | -1.710824 | -1.964496 | 22 | 6 | 0 | -4.324874 | -1.710824 | -1.964496 |
| 23 | 6 | 0 | -4.789174 | 0.700119  | -1.693835 | 23 | 6 | 0 | -4.789174 | 0.700119  | -1.693835 |
| 24 | 6 | 0 | 0.555861  | 2.715333  | -0.566071 | 24 | 6 | 0 | 0.555861  | 2.715333  | -0.566071 |
| 25 | 6 | 0 | -4.112080 | 1.983123  | -1.780671 | 25 | 6 | 0 | -4.112080 | 1.983123  | -1.780671 |
| 26 | 6 | 0 | -1.837123 | 2.845345  | -2.200645 | 26 | 6 | 0 | -1.837123 | 2.845345  | -2.200645 |
| 27 | 6 | 0 | -5.113893 | 0.463000  | -0.297556 | 27 | 6 | 0 | -5.113893 | 0.463000  | -0.297556 |
| 28 | 6 | 0 | -4.057989 | 2.553433  | -0.451651 | 28 | 6 | 0 | -4.057989 | 2.553433  | -0.451651 |
| 29 | 6 | 0 | -1.816665 | 3.448534  | -0.956640 | 29 | 6 | 0 | -1.816665 | 3.448534  | -0.956640 |
| 30 | 6 | 0 | 0.768852  | -2.842977 | -0.136042 | 30 | 6 | 0 | 0.768852  | -2.842977 | -0.136042 |
| 31 | 6 | 0 | -4.646207 | -1.937181 | -0.620682 | 31 | 6 | 0 | -4.646207 | -1.937181 | -0.620682 |
| 32 | 6 | 0 | 2.169631  | 0.407345  | -0.870878 | 32 | 6 | 0 | 2.169631  | 0.407345  | -0.870878 |
| 33 | 6 | 0 | -4.633256 | 1.590667  | 0.475780  | 33 | 6 | 0 | -4.633256 | 1.590667  | 0.475780  |
| 34 | 6 | 0 | -2.954824 | 3.300784  | -0.058091 | 34 | 6 | 0 | -2.954824 | 3.300784  | -0.058091 |
| 35 | 6 | 0 | -0.605230 | 3.410847  | -0.176042 | 35 | 6 | 0 | -0.605230 | 3.410847  | -0.176042 |
| 36 | 6 | 0 | -1.011065 | 3.346262  | 1.197633  | 36 | 6 | 0 | -1.011065 | 3.346262  | 1.197633  |
| 37 | 6 | 0 | 1.538381  | 2.336580  | 0.460141  | 37 | 6 | 0 | 1.538381  | 2.336580  | 0.460141  |
| 38 | 6 | 0 | 2.295761  | -0.905586 | -0.479787 | 38 | 6 | 0 | 2.295761  | -0.905586 | -0.479787 |
| 39 | 6 | 0 | 2.403716  | -2.250610 | 1.646003  | 39 | 6 | 0 | 2.403716  | -2.250610 | 1.646003  |
| 40 | 6 | 0 | -2.418232 | 3.152048  | 1.275242  | 40 | 6 | 0 | -2.418232 | 3.152048  | 1.275242  |
| 41 | 6 | 0 | -2.880723 | 2.141841  | 2.128338  | 41 | 6 | 0 | -2.880723 | 2.141841  | 2.128338  |
| 42 | 6 | 0 | -2.004087 | 1.359400  | 2.991692  | 42 | 6 | 0 | -2.004087 | 1.359400  | 2.991692  |
| 43 | 6 | 0 | -4.020768 | 1.369956  | 1.712827  | 43 | 6 | 0 | -4.020768 | 1.369956  | 1.712827  |
| 44 | 6 | 0 | -3.843413 | -2.847882 | 0.167144  | 44 | 6 | 0 | -3.843413 | -2.847882 | 0.167144  |
| 45 | 6 | 0 | 1.755173  | 2.211203  | 3.183345  | 45 | 6 | 0 | 1.755173  | 2.211203  | 3.183345  |
| 46 | 6 | 0 | -5.026192 | -0.820909 | 0.233753  | 46 | 6 | 0 | -5.026192 | -0.820909 | 0.233753  |
| 47 | 6 | 0 | -4.414650 | -1.025859 | 1.536413  | 47 | 6 | 0 | -4.414650 | -1.025859 | 1.536413  |
| 48 | 6 | 0 | 1.181853  | 2.457471  | 1.800549  | 48 | 6 | 0 | 1.181853  | 2.457471  | 1.800549  |
| 49 | 6 | 0 | 0.968962  | -2.590096 | 1.285224  | 49 | 6 | 0 | 0.968962  | -2.590096 | 1.285224  |
| 50 | 6 | 0 | -0.154504 | -2.613113 | 2.122713  | 50 | 6 | 0 | -0.154504 | -2.613113 | 2.122713  |
| 51 | 6 | 0 | -0.200754 | 2.727251  | 2.110732  | 51 | 6 | 0 | -0.200754 | 2.727251  | 2.110732  |
| 52 | 6 | 0 | -0.688030 | 1.836810  | 3.139984  | 52 | 6 | 0 | -0.688030 | 1.836810  | 3.139984  |
| 53 | 6 | 0 | -3.865667 | 0.044293  | 2.251231  | 53 | 6 | 0 | -3.865667 | 0.044293  | 2.251231  |
| 54 | 6 | 0 | -2.606909 | -0.041909 | 3.005624  | 54 | 6 | 0 | -2.606909 | -0.041909 | 3.005624  |
| 55 | 6 | 0 | 0.516652  | 1.680941  | 4.036471  | 55 | 6 | 0 | 0.516652  | 1.680941  | 4.036471  |
| 56 | 6 | 0 | -3.711724 | -2.275655 | 1.497783  | 56 | 6 | 0 | -3.711724 | -2.275655 | 1.497783  |
| 57 | 6 | 0 | -1.401043 | -3.082651 | 1.603949  | 57 | 6 | 0 | -1.401043 | -3.082651 | 1.603949  |

-----

Standard orientation:

| Center Number | Atomic Number | Atomic Type | Coordinates (Angstroms) |           |           |
|---------------|---------------|-------------|-------------------------|-----------|-----------|
|               |               |             | X                       | Y         | Z         |
| 1             | 6             | 0           | -2.584146               | 1.024346  | -3.462966 |
| 2             | 6             | 0           | -1.130657               | 1.047730  | -3.494927 |
| 3             | 6             | 0           | -0.429587               | -0.145619 | -3.527525 |
| 4             | 6             | 0           | -1.135662               | -1.415808 | -3.523976 |
| 5             | 6             | 0           | -2.528192               | -1.443161 | -3.452357 |
| 6             | 6             | 0           | -3.268237               | -0.193905 | -3.419250 |
| 7             | 6             | 0           | -0.655814               | 2.134493  | -2.660188 |
| 8             | 6             | 0           | 0.770181                | -0.279001 | -2.744721 |
| 9             | 6             | 0           | -0.347886               | -2.332079 | -2.732458 |
| 10            | 6             | 0           | -3.185358               | -2.385477 | -2.561854 |
| 11            | 6             | 0           | -4.384885               | -0.362101 | -2.504796 |
| 12            | 6             | 0           | -3.020237               | 2.136350  | -2.646474 |
| 13            | 6             | 0           | -2.418072               | -3.269832 | -1.797313 |
| 14            | 6             | 0           | -0.969300               | -3.245735 | -1.890197 |
| 15            | 6             | 0           | -2.760024               | -3.508717 | -0.409223 |
| 16            | 6             | 0           | -0.413774               | -3.464163 | -0.573300 |



|    |   |   |           |           |           |    |   |   |           |           |           |
|----|---|---|-----------|-----------|-----------|----|---|---|-----------|-----------|-----------|
| 58 | 6 | 0 | -2.515408 | -2.360481 | 2.188779  | 78 | 8 | 0 | 0.539528  | 1.392123  | 5.205709  |
| 59 | 6 | 0 | -1.990517 | -1.300006 | 3.013279  | 79 | 6 | 0 | -0.561495 | -1.722465 | 3.314500  |
| 60 | 6 | 0 | 2.775884  | 1.563100  | -0.069340 | 80 | 8 | 0 | 0.063291  | -1.410229 | 4.305672  |
| 61 | 6 | 0 | 3.218857  | -1.387838 | 0.616586  | 81 | 1 | 0 | 4.549852  | -0.508536 | 2.133449  |
| 62 | 6 | 0 | 3.890518  | -0.229743 | 1.319145  | 82 | 1 | 0 | 4.197748  | 1.819794  | 1.601465  |
| 63 | 6 | 0 | 3.696984  | 1.053542  | 1.018444  | 83 | 1 | 0 | 3.242013  | 4.295906  | 0.083514  |
| 64 | 6 | 0 | 4.320616  | -2.248460 | -0.069861 | 84 | 1 | 0 | 4.755804  | 5.637768  | -1.386699 |
| 65 | 6 | 0 | 3.634092  | 2.459894  | -0.984434 | 85 | 1 | 0 | 5.958762  | 4.467947  | -3.263030 |
| 66 | 8 | 0 | 2.920208  | -2.750738 | 2.622398  | 86 | 1 | 0 | 5.595482  | 2.011495  | -3.552162 |
| 67 | 8 | 0 | 2.820234  | 2.558785  | 3.626543  | 87 | 1 | 0 | 4.872742  | -0.591384 | -1.342021 |
| 68 | 6 | 0 | 3.779162  | 3.828705  | -0.735508 | 88 | 1 | 0 | 6.631916  | -1.836192 | -2.541088 |
| 69 | 6 | 0 | 4.624439  | 4.572671  | -1.556583 | 89 | 1 | 0 | 7.091536  | -4.220046 | -1.973946 |
| 70 | 6 | 0 | 5.293891  | 3.928011  | -2.596067 | 90 | 1 | 0 | 5.771177  | -5.325502 | -0.177974 |
| 71 | 6 | 0 | 5.089715  | 2.557189  | -2.757665 | 91 | 1 | 0 | 4.035833  | -4.086689 | 1.034585  |
| 72 | 7 | 0 | 4.283624  | 1.832892  | -1.973912 | 92 | 8 | 0 | 1.999046  | -0.142739 | 3.115001  |
| 73 | 6 | 0 | 5.071278  | -1.627664 | -1.081330 | 93 | 1 | 0 | 1.665537  | -0.686115 | 3.854022  |
| 74 | 6 | 0 | 6.061458  | -2.333208 | -1.760690 | 94 | 1 | 0 | 1.336459  | -0.255028 | 2.418894  |
| 75 | 6 | 0 | 6.319406  | -3.669118 | -1.443585 |    |   |   |           |           |           |
| 76 | 6 | 0 | 5.578528  | -4.288221 | -0.438814 |    |   |   |           |           |           |
| 77 | 6 | 0 | 4.583980  | -3.584479 | 0.247261  |    |   |   |           |           |           |

-----

An imaginary frequency was found at  $-81.56\text{ cm}^{-1}$ .  
The total electronic energy was calculated to be  $-3296.5688033$  Hartree.

**Table S28.** Optimized structure of **TS1c** (B3LYP-D3/6-31G(d))

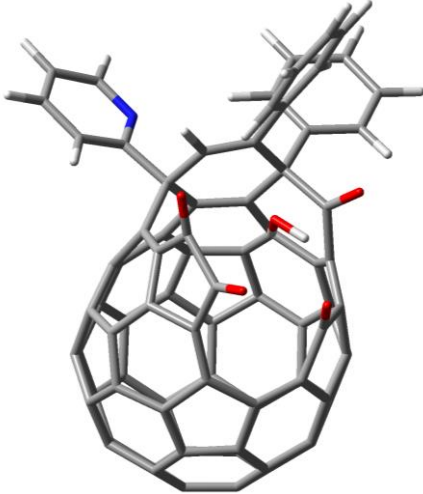

Standard orientation:

| Center Number | Atomic Number | Atomic Type | Coordinates (Angstroms) |           |           |
|---------------|---------------|-------------|-------------------------|-----------|-----------|
|               |               |             | X                       | Y         | Z         |
| 1             | 6             | 0           | -3.778004               | 0.282465  | 3.105835  |
| 2             | 6             | 0           | -2.366335               | 0.312224  | 3.452433  |
| 3             | 6             | 0           | -1.623821               | 1.451712  | 3.193316  |
| 4             | 6             | 0           | -2.243497               | 2.610318  | 2.571821  |
| 5             | 6             | 0           | -3.587174               | 2.570837  | 2.199369  |
| 6             | 6             | 0           | -4.370736               | 1.378222  | 2.471693  |
| 7             | 6             | 0           | -1.787983               | -0.992604 | 3.195495  |
| 8             | 6             | 0           | -0.282534               | 1.317837  | 2.691411  |
| 9             | 6             | 0           | -1.259380               | 3.188322  | 1.686269  |
| 10            | 6             | 0           | -3.991830               | 3.095376  | 0.904848  |
| 11            | 6             | 0           | -5.261628               | 1.163655  | 1.343834  |
| 12            | 6             | 0           | -4.095038               | -1.064869 | 2.684305  |
| 13            | 6             | 0           | -3.034496               | 3.651750  | 0.050989  |
| 14            | 6             | 0           | -1.641023               | 3.706978  | 0.455036  |
| 15            | 6             | 0           | -3.063711               | 3.343928  | -1.365190 |
| 16            | 6             | 0           | -0.811190               | 3.435219  | -0.697138 |
| 17            | 6             | 0           | -0.487418               | -1.136456 | 2.655154  |
| 18            | 6             | 0           | -0.041684               | 2.416544  | 1.780745  |
| 19            | 6             | 0           | -1.691308               | 3.212703  | -1.813959 |
| 20            | 6             | 0           | 0.810657                | 2.230260  | 0.700005  |
| 21            | 6             | 0           | 0.297241                | 0.069770  | 2.434457  |
| 22            | 6             | 0           | -5.015730               | 2.214933  | 0.369832  |
| 23            | 6             | 0           | -5.546111               | -0.134582 | 0.915794  |
| 24            | 6             | 0           | -0.202769               | -2.270771 | 1.764159  |
| 25            | 6             | 0           | -4.973718               | -1.274189 | 1.612315  |
| 26            | 6             | 0           | -2.884949               | -1.855368 | 2.791840  |
| 27            | 6             | 0           | -5.562144               | -0.443825 | -0.503778 |
| 28            | 6             | 0           | -4.679148               | -2.297980 | 0.632749  |
| 29            | 6             | 0           | -2.640583               | -2.877186 | 1.893091  |
| 30            | 6             | 0           | 0.400772                | 2.730545  | -0.607624 |
| 31            | 6             | 0           | -5.036625               | 1.915030  | -0.997783 |
| 32            | 6             | 0           | 1.431835                | 0.026539  | 1.536784  |
| 33            | 6             | 0           | -4.997613               | -1.766543 | -0.684419 |
| 34            | 6             | 0           | -3.561308               | -3.108962 | 0.786604  |
| 35            | 6             | 0           | -1.294062               | -3.095746 | 1.426163  |
| 36            | 6             | 0           | -1.406479               | -3.564212 | 0.076706  |
| 37            | 6             | 0           | 0.986279                | -2.268982 | 0.898224  |
| 38            | 6             | 0           | 1.715480                | 1.100453  | 0.733927  |
| 39            | 6             | 0           | 2.335923                | 1.562649  | -1.650370 |
| 40            | 6             | 0           | -2.756129               | -3.456837 | -0.361555 |
| 41            | 6             | 0           | -2.978696               | -2.853086 | -1.606116 |
| 42            | 6             | 0           | -1.901567               | -2.426681 | -2.491762 |
| 43            | 6             | 0           | -4.134292               | -2.009941 | -1.757120 |
| 44            | 6             | 0           | -4.036936               | 2.486396  | -1.874485 |
| 45            | 6             | 0           | 1.753011                | -3.209711 | -1.553306 |
| 46            | 6             | 0           | -5.292641               | 0.551553  | -1.439225 |
| 47            | 6             | 0           | -4.413922               | 0.271280  | -2.562394 |
| 48            | 6             | 0           | 0.903468                | -2.892695 | -0.341624 |
| 49            | 6             | 0           | 0.879837                | 1.966240  | -1.750359 |
| 50            | 6             | 0           | -0.039581               | 1.635337  | -2.753213 |
| 51            | 6             | 0           | -0.396202               | -3.305820 | -0.808934 |
| 52            | 6             | 0           | -0.610867               | -2.886712 | -2.174444 |
| 53            | 6             | 0           | -3.794873               | -0.975487 | -2.699723 |
| 54            | 6             | 0           | -2.403500               | -1.146028 | -3.142002 |
| 55            | 6             | 0           | 0.756381                | -3.063528 | -2.788600 |
| 56            | 6             | 0           | -3.661789               | 1.461389  | -2.836507 |
| 57            | 6             | 0           | -1.337957               | 2.231008  | -2.730288 |
| 58            | 6             | 0           | -0.231210               | 0.338136  | -3.561109 |
| 59            | 6             | 0           | -2.342277               | 1.310685  | -3.228560 |
| 60            | 6             | 0           | -1.718243               | 0.032491  | -3.462721 |
| 61            | 6             | 0           | 2.126986                | -1.315216 | 1.344228  |

|    |   |   |          |           |           |     |   |   |          |           |           |
|----|---|---|----------|-----------|-----------|-----|---|---|----------|-----------|-----------|
| 62 | 6 | 0 | 2.892056 | 1.197964  | -0.222218 | 85  | 6 | 0 | 6.434232 | -1.508464 | -2.526214 |
| 63 | 6 | 0 | 3.714454 | -0.104275 | -0.275091 | 86  | 6 | 0 | 7.396040 | -0.497315 | -2.517743 |
| 64 | 6 | 0 | 3.293816 | -1.199019 | 0.386794  | 87  | 1 | 0 | 3.885539 | -2.105134 | 0.306751  |
| 65 | 6 | 0 | 3.722044 | 2.380311  | 0.349561  | 88  | 1 | 0 | 2.519085 | -3.901376 | 2.274659  |
| 66 | 6 | 0 | 2.746810 | -1.791946 | 2.676653  | 89  | 1 | 0 | 3.647425 | -4.569232 | 4.405718  |
| 67 | 8 | 0 | 3.050832 | 1.637313  | -2.626281 | 90  | 1 | 0 | 4.477397 | -2.759541 | 5.945627  |
| 68 | 8 | 0 | 2.840343 | -3.732636 | -1.569454 | 91  | 1 | 0 | 4.151470 | -0.378387 | 5.258579  |
| 69 | 6 | 0 | 2.890722 | -3.152457 | 2.966588  | 92  | 1 | 0 | 4.058039 | 1.306490  | 2.191539  |
| 70 | 6 | 0 | 3.521121 | -3.519873 | 4.153989  | 93  | 1 | 0 | 5.370488 | 3.123196  | 3.236022  |
| 71 | 6 | 0 | 3.983722 | -2.520223 | 5.008925  | 94  | 1 | 0 | 5.763976 | 5.252868  | 2.003025  |
| 72 | 6 | 0 | 3.800387 | -1.191149 | 4.625406  | 95  | 1 | 0 | 4.832942 | 5.532535  | -0.287420 |
| 73 | 7 | 0 | 3.201003 | -0.826915 | 3.486579  | 96  | 1 | 0 | 3.567066 | 3.712699  | -1.346272 |
| 74 | 6 | 0 | 4.235963 | 2.230393  | 1.646635  | 97  | 1 | 0 | 7.885897 | 1.462784  | -1.763664 |
| 75 | 6 | 0 | 4.970408 | 3.257169  | 2.234489  | 98  | 1 | 0 | 5.814923 | 1.724300  | -0.511090 |
| 76 | 6 | 0 | 5.190523 | 4.452229  | 1.543977  | 99  | 1 | 0 | 4.497555 | -2.139276 | -1.875584 |
| 77 | 6 | 0 | 4.667413 | 4.609308  | 0.261267  | 100 | 1 | 0 | 6.601419 | -2.419350 | -3.095182 |
| 78 | 6 | 0 | 3.934762 | 3.579645  | -0.335496 | 101 | 1 | 0 | 8.323271 | -0.612823 | -3.073171 |
| 79 | 8 | 0 | 0.575382 | -0.321527 | -4.178802 | 102 | 8 | 0 | 2.396204 | -1.122673 | -2.508734 |
| 80 | 8 | 0 | 1.027239 | -3.266450 | -3.944299 | 103 | 1 | 0 | 2.178581 | -0.845621 | -3.416483 |
| 81 | 6 | 0 | 7.148153 | 0.664726  | -1.789278 | 104 | 1 | 0 | 1.826522 | -0.572253 | -1.960262 |
| 82 | 6 | 0 | 5.956819 | 0.818130  | -1.079954 |     |   |   |          |           |           |
| 83 | 6 | 0 | 4.976055 | -0.189207 | -1.081396 |     |   |   |          |           |           |
| 84 | 6 | 0 | 5.242574 | -1.357326 | -1.821729 |     |   |   |          |           |           |

An imaginary frequency was found at  $-94.30\text{ cm}^{-1}$ .  
The total electronic energy was calculated to be  $-3527.6355484$  Hartree.

**Table S29.** Optimized structure of **TS1d** (B3LYP-D3/6-31G(d))

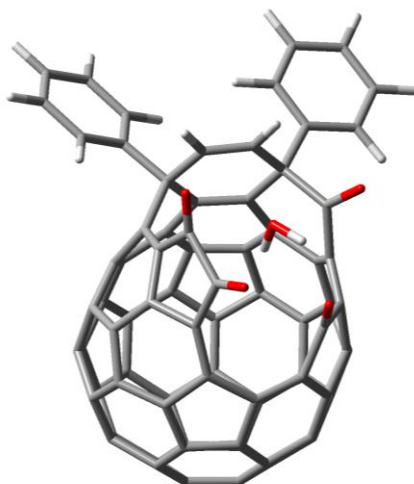

| Center Number | Atomic Number | Atomic Type | Coordinates (Angstroms) |           |           |
|---------------|---------------|-------------|-------------------------|-----------|-----------|
|               |               |             | X                       | Y         | Z         |
| 16            | 6             | 0           | -0.464972               | -3.465655 | -0.505169 |
| 17            | 6             | 0           | 0.530437                | 1.956236  | -1.889977 |
| 18            | 6             | 0           | 0.816120                | -1.703752 | -2.244485 |
| 19            | 6             | 0           | -1.574306               | -3.598042 | 0.402536  |
| 20            | 6             | 0           | 1.409112                | -1.959593 | -1.013679 |
| 21            | 6             | 0           | 1.265072                | 0.698751  | -1.949269 |
| 22            | 6             | 0           | -4.348879               | -1.685133 | -1.935554 |
| 23            | 6             | 0           | -4.775540               | 0.737297  | -1.710795 |
| 24            | 6             | 0           | 0.599998                | 2.690422  | -0.618757 |
| 25            | 6             | 0           | -4.078938               | 2.008084  | -1.821063 |
| 26            | 6             | 0           | -1.790903               | 2.827416  | -2.255702 |
| 27            | 6             | 0           | -5.105453               | 0.531800  | -0.310898 |
| 28            | 6             | 0           | -4.016656               | 2.602213  | -0.502867 |
| 29            | 6             | 0           | -1.760962               | 3.451965  | -1.022426 |
| 30            | 6             | 0           | 0.726068                | -2.853257 | -0.078263 |
| 31            | 6             | 0           | -4.674712               | -1.880941 | -0.587958 |
| 32            | 6             | 0           | 2.182101                | 0.357685  | -0.881219 |
| 33            | 6             | 0           | -4.608409               | 1.666426  | 0.441700  |
| 34            | 6             | 0           | -2.901629               | 3.338702  | -0.122065 |
| 35            | 6             | 0           | -0.550493               | 3.408893  | -0.240577 |
| 36            | 6             | 0           | -0.957563               | 3.374411  | 1.133863  |
| 37            | 6             | 0           | 1.575732                | 2.311501  | 0.412769  |
| 38            | 6             | 0           | 2.290664                | -0.951806 | -0.467353 |
| 39            | 6             | 0           | 2.378167                | -2.272573 | 1.683973  |
| 40            | 6             | 0           | -2.367984               | 3.205616  | 1.214177  |
| 41            | 6             | 0           | -2.849310               | 2.220893  | 2.086507  |
| 42            | 6             | 0           | -1.986793               | 1.440263  | 2.965132  |
| 43            | 6             | 0           | -4.001400               | 1.459726  | 1.683788  |
| 44            | 6             | 0           | -3.886516               | -2.788528 | 0.218184  |
| 45            | 6             | 0           | 1.788961                | 2.221359  | 3.136296  |
| 46            | 6             | 0           | -5.038817               | -0.743142 | 0.244623  |
| 47            | 6             | 0           | -4.432825               | -0.932918 | 1.552108  |
| 48            | 6             | 0           | 1.220298                | 2.457043  | 1.750782  |
| 49            | 6             | 0           | 0.928664                | -2.574579 | 1.339077  |
| 50            | 6             | 0           | -0.196169               | -2.567186 | 2.174232  |
| 51            | 6             | 0           | -0.157809               | 2.756023  | 2.056825  |
| 52            | 6             | 0           | -0.661419               | 1.894409  | 3.102380  |
| 53            | 6             | 0           | -3.868554               | 0.142114  | 2.247412  |
| 54            | 6             | 0           | -2.613030               | 0.050479  | 3.005986  |
| 55            | 6             | 0           | 0.540999                | 1.728279  | 3.998875  |

Standard orientation:

| Center Number | Atomic Number | Atomic Type | Coordinates (Angstroms) |           |           |
|---------------|---------------|-------------|-------------------------|-----------|-----------|
|               |               |             | X                       | Y         | Z         |
| 1             | 6             | 0           | -2.565581               | 0.994379  | -3.484027 |
| 2             | 6             | 0           | -1.112066               | 0.994916  | -3.515602 |
| 3             | 6             | 0           | -0.429027               | -0.209089 | -3.526665 |
| 4             | 6             | 0           | -1.154120               | -1.468001 | -3.498084 |
| 5             | 6             | 0           | -2.547009               | -1.473011 | -3.426546 |
| 6             | 6             | 0           | -3.267970               | -0.212359 | -3.417764 |
| 7             | 6             | 0           | -0.620726               | 2.090379  | -2.701579 |
| 8             | 6             | 0           | 0.768568                | -0.345180 | -2.740505 |
| 9             | 6             | 0           | -0.380704               | -2.380109 | -2.687845 |
| 10            | 6             | 0           | -3.218660               | -2.387761 | -2.518213 |
| 11            | 6             | 0           | -4.387769               | -0.346188 | -2.501395 |
| 12            | 6             | 0           | -2.984527               | 2.128185  | -2.688676 |
| 13            | 6             | 0           | -2.465171               | -3.268280 | -1.735694 |
| 14            | 6             | 0           | -1.016147               | -3.266245 | -1.827138 |
| 15            | 6             | 0           | -2.811819               | -3.475359 | -0.343777 |

|    |   |   |           |           |           |    |   |   |           |           |           |
|----|---|---|-----------|-----------|-----------|----|---|---|-----------|-----------|-----------|
| 56 | 6 | 0 | -3.748435 | -2.193641 | 1.538094  | 78 | 8 | 0 | 0.561923  | 1.454351  | 5.171724  |
| 57 | 6 | 0 | -1.448816 | -3.029595 | 1.662309  | 79 | 6 | 0 | -0.594824 | -1.653974 | 3.352073  |
| 58 | 6 | 0 | -2.554593 | -2.283370 | 2.232871  | 80 | 8 | 0 | 0.028889  | -1.338926 | 4.342961  |
| 59 | 6 | 0 | -2.016305 | -1.216174 | 3.039316  | 81 | 1 | 0 | 4.528822  | -0.537694 | 2.156985  |
| 60 | 6 | 0 | 2.809820  | 1.520657  | -0.104647 | 82 | 1 | 0 | 4.216314  | 1.783658  | 1.574339  |
| 61 | 6 | 0 | 3.202505  | -1.426713 | 0.642716  | 83 | 1 | 0 | 4.170768  | 0.857480  | -2.417152 |
| 62 | 6 | 0 | 3.878999  | -0.265548 | 1.332828  | 84 | 1 | 0 | 5.651374  | 2.282513  | -3.787128 |
| 63 | 6 | 0 | 3.708289  | 1.013702  | 1.003287  | 85 | 1 | 0 | 6.017317  | 4.665687  | -3.169108 |
| 64 | 6 | 0 | 4.278802  | -2.325933 | -0.026291 | 86 | 1 | 0 | 4.890151  | 5.599441  | -1.155309 |
| 65 | 6 | 0 | 3.676052  | 2.418047  | -1.013792 | 87 | 1 | 0 | 3.408252  | 4.169484  | 0.212618  |
| 66 | 8 | 0 | 2.905489  | -2.812229 | 2.631151  | 88 | 1 | 0 | 5.333614  | -0.616886 | -0.804987 |
| 67 | 8 | 0 | 2.860953  | 2.550804  | 3.576183  | 89 | 1 | 0 | 7.017867  | -1.950706 | -2.022767 |
| 68 | 6 | 0 | 4.323383  | 1.896287  | -2.139906 | 90 | 1 | 0 | 6.933991  | -4.440736 | -1.945131 |
| 69 | 6 | 0 | 5.161210  | 2.701657  | -2.912414 | 91 | 1 | 0 | 5.145697  | -5.563816 | -0.628551 |
| 70 | 6 | 0 | 5.367171  | 4.037986  | -2.565978 | 92 | 1 | 0 | 3.477381  | -4.239363 | 0.587545  |
| 71 | 6 | 0 | 4.733561  | 4.561844  | -1.437569 | 93 | 8 | 0 | 2.011770  | -0.170348 | 3.126216  |
| 72 | 6 | 0 | 3.895023  | 3.756530  | -0.666815 | 94 | 1 | 0 | 1.653688  | -0.674363 | 3.881449  |
| 73 | 6 | 0 | 5.289887  | -1.701094 | -0.769832 | 95 | 1 | 0 | 1.323930  | -0.237883 | 2.449005  |
| 74 | 6 | 0 | 6.240019  | -2.455512 | -1.456010 |    |   |   |           |           |           |
| 75 | 6 | 0 | 6.193553  | -3.850244 | -1.412577 |    |   |   |           |           |           |
| 76 | 6 | 0 | 5.190228  | -4.479097 | -0.675691 |    |   |   |           |           |           |
| 77 | 6 | 0 | 4.237956  | -3.724001 | 0.012105  |    |   |   |           |           |           |

-----  
An imaginary frequency was found at  $-73.25\text{ cm}^{-1}$ .  
The total electronic energy was calculated to be  $-3280.5291721$  Hartree.

**Table S30.** Optimized structure of **TS1e** (B3LYP-D3/6-31G(d))

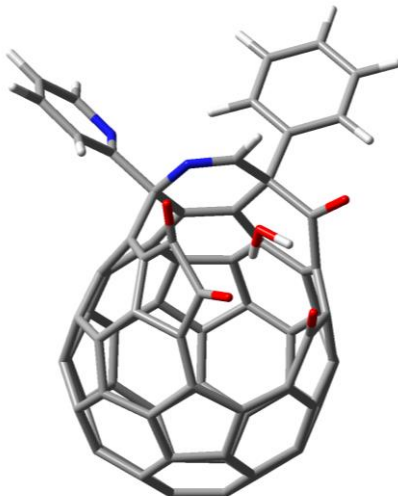

|    |   |   |           |           |           |
|----|---|---|-----------|-----------|-----------|
| 17 | 6 | 0 | 0.464086  | 1.926417  | -1.927817 |
| 18 | 6 | 0 | 0.715686  | -1.733875 | -2.309729 |
| 19 | 6 | 0 | -1.606221 | -3.612581 | 0.406922  |
| 20 | 6 | 0 | 1.346046  | -2.003106 | -1.099687 |
| 21 | 6 | 0 | 1.187078  | 0.665859  | -2.017606 |
| 22 | 6 | 0 | -4.437322 | -1.673018 | -1.838091 |
| 23 | 6 | 0 | -4.840865 | 0.751727  | -1.597041 |
| 24 | 6 | 0 | 0.576526  | 2.654185  | -0.654550 |
| 25 | 6 | 0 | -4.138680 | 2.017606  | -1.726046 |
| 26 | 6 | 0 | -1.858260 | 2.819376  | -2.225800 |
| 27 | 6 | 0 | -5.129450 | 0.546154  | -0.187894 |
| 28 | 6 | 0 | -4.033607 | 2.609920  | -0.409855 |
| 29 | 6 | 0 | -1.786842 | 3.442129  | -0.993422 |
| 30 | 6 | 0 | 0.684622  | -2.892779 | -0.147641 |
| 31 | 6 | 0 | -4.722525 | -1.868721 | -0.481286 |
| 32 | 6 | 0 | 2.123468  | 0.311255  | -0.977115 |
| 33 | 6 | 0 | -4.603349 | 1.676703  | 0.550878  |
| 34 | 6 | 0 | -2.902714 | 3.338496  | -0.061202 |
| 35 | 6 | 0 | -0.554998 | 3.388215  | -0.246049 |
| 36 | 6 | 0 | -0.923758 | 3.361913  | 1.138894  |
| 37 | 6 | 0 | 1.571528  | 2.266834  | 0.355267  |
| 38 | 6 | 0 | 2.233143  | -0.994885 | -0.569708 |
| 39 | 6 | 0 | 2.376734  | -2.291741 | 1.577247  |
| 40 | 6 | 0 | -2.332658 | 3.202765  | 1.259359  |
| 41 | 6 | 0 | -2.794432 | 2.219939  | 2.144441  |
| 42 | 6 | 0 | -1.910839 | 1.433577  | 2.996490  |
| 43 | 6 | 0 | -3.961106 | 1.464750  | 1.774279  |
| 44 | 6 | 0 | -3.915365 | -2.782595 | 0.298343  |
| 45 | 6 | 0 | 1.865739  | 2.230930  | 3.082261  |
| 46 | 6 | 0 | -5.053101 | -0.729942 | 0.363559  |
| 47 | 6 | 0 | -4.407598 | -0.925425 | 1.651192  |
| 48 | 6 | 0 | 1.264339  | 2.431671  | 1.701977  |
| 49 | 6 | 0 | 0.931295  | -2.612520 | 1.260690  |
| 50 | 6 | 0 | -0.164688 | -2.593644 | 2.132138  |
| 51 | 6 | 0 | -0.102619 | 2.742684  | 2.041936  |
| 52 | 6 | 0 | -0.581614 | 1.883494  | 3.101532  |
| 53 | 6 | 0 | -3.817201 | 0.145087  | 2.331085  |
| 54 | 6 | 0 | -2.537745 | 0.045950  | 3.048338  |
| 55 | 6 | 0 | 0.640554  | 1.720661  | 3.971202  |
| 56 | 6 | 0 | -3.730479 | -2.189420 | 1.613589  |
| 57 | 6 | 0 | -1.435943 | -3.045160 | 1.662653  |

Standard orientation:

| Center Number | Atomic Number | Atomic Type | Coordinates (Angstroms) |           |           |
|---------------|---------------|-------------|-------------------------|-----------|-----------|
|               |               |             | X                       | Y         | Z         |
| 1             | 6             | 0           | -2.682643               | 0.995813  | -3.435213 |
| 2             | 6             | 0           | -1.230813               | 0.985274  | -3.510451 |
| 3             | 6             | 0           | -0.557855               | -0.224124 | -3.545819 |
| 4             | 6             | 0           | -1.291617               | -1.477655 | -3.499158 |
| 5             | 6             | 0           | -2.681645               | -1.471777 | -3.384545 |
| 6             | 6             | 0           | -3.392244               | -0.205622 | -3.350742 |
| 7             | 6             | 0           | -0.707808               | 2.074098  | -2.706784 |
| 8             | 6             | 0           | 0.662171                | -0.372480 | -2.797589 |
| 9             | 6             | 0           | -0.500453               | -2.399326 | -2.716852 |
| 10            | 6             | 0           | -3.331904               | -2.383265 | -2.457458 |
| 11            | 6             | 0           | -4.484171               | -0.332933 | -2.400411 |
| 12            | 6             | 0           | -3.069360               | 2.130880  | -2.625290 |
| 13            | 6             | 0           | -2.561747               | -3.272304 | -1.701327 |
| 14            | 6             | 0           | -1.116215               | -3.283914 | -1.839570 |
| 15            | 6             | 0           | -2.865503               | -3.477962 | -0.299070 |
| 16            | 6             | 0           | -0.525224               | -3.493334 | -0.536228 |

|    |   |   |           |           |           |    |   |   |           |           |           |
|----|---|---|-----------|-----------|-----------|----|---|---|-----------|-----------|-----------|
| 58 | 6 | 0 | -2.514209 | -2.286271 | 2.267804  | 78 | 8 | 0 | 0.684831  | 1.445503  | 5.143172  |
| 59 | 6 | 0 | -1.941233 | -1.221543 | 3.054081  | 79 | 6 | 0 | -0.508101 | -1.662779 | 3.312359  |
| 60 | 6 | 0 | 2.771833  | 1.438505  | -0.174520 | 80 | 8 | 0 | 0.162573  | -1.338382 | 4.268161  |
| 61 | 6 | 0 | 3.162008  | -1.432993 | 0.532312  | 81 | 1 | 0 | 4.470949  | -0.457474 | 2.032077  |
| 62 | 6 | 0 | 3.793296  | -0.214902 | 1.216534  | 82 | 1 | 0 | 3.898964  | 3.827084  | 0.472812  |
| 63 | 7 | 0 | 3.636674  | 1.008470  | 0.918955  | 83 | 1 | 0 | 5.410995  | 5.234640  | -0.961247 |
| 64 | 6 | 0 | 4.339527  | -2.221686 | -0.108799 | 84 | 1 | 0 | 6.000591  | 4.394697  | -3.259609 |
| 65 | 6 | 0 | 3.677263  | 2.323372  | -1.054808 | 85 | 1 | 0 | 5.067288  | 2.198086  | -3.997831 |
| 66 | 8 | 0 | 2.911769  | -2.784648 | 2.548470  | 86 | 1 | 0 | 4.678765  | -0.643380 | -1.552580 |
| 67 | 8 | 0 | 2.922732  | 2.620044  | 3.501649  | 87 | 1 | 0 | 6.568333  | -1.768246 | -2.648882 |
| 68 | 6 | 0 | 4.166465  | 3.527721  | -0.535431 | 88 | 1 | 0 | 7.327933  | -4.008927 | -1.861613 |
| 69 | 6 | 0 | 5.012601  | 4.293506  | -1.329964 | 89 | 1 | 0 | 6.169963  | -5.085287 | 0.060109  |
| 70 | 6 | 0 | 5.344993  | 3.828331  | -2.605236 | 90 | 1 | 0 | 4.303242  | -3.955714 | 1.182129  |
| 71 | 6 | 0 | 4.821998  | 2.605535  | -3.018962 | 91 | 8 | 0 | 2.213662  | -0.164018 | 3.166932  |
| 72 | 7 | 0 | 4.002851  | 1.859045  | -2.262797 | 92 | 1 | 0 | 1.923335  | -0.682761 | 3.939088  |
| 73 | 6 | 0 | 5.001400  | -1.615452 | -1.189734 | 93 | 1 | 0 | 1.478313  | -0.273263 | 2.548611  |
| 74 | 6 | 0 | 6.069943  | -2.254534 | -1.814584 |    |   |   |           |           |           |
| 75 | 6 | 0 | 6.495931  | -3.508843 | -1.373341 |    |   |   |           |           |           |
| 76 | 6 | 0 | 5.846168  | -4.111557 | -0.297504 |    |   |   |           |           |           |
| 77 | 6 | 0 | 4.776969  | -3.473336 | 0.337027  |    |   |   |           |           |           |

-----  
An imaginary frequency was found at  $-77.56\text{ cm}^{-1}$ .  
The total electronic energy was calculated to be  $-3312.6065075$  Hartree.

**Table S31.** Optimized structure of **TS1f** (B3LYP-D3/6-31G(d))

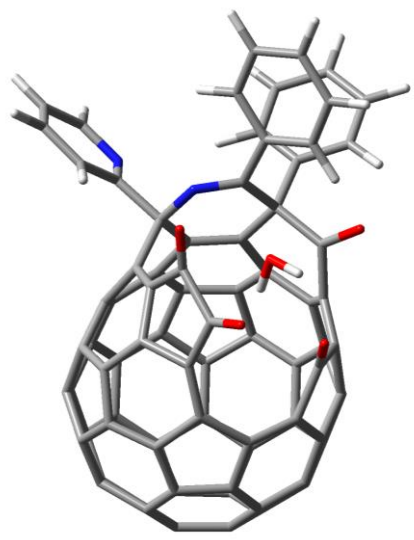

|    |   |   |           |           |           |
|----|---|---|-----------|-----------|-----------|
| 17 | 6 | 0 | -0.408268 | 2.826904  | -0.504057 |
| 18 | 6 | 0 | -0.093923 | 0.143361  | -3.013674 |
| 19 | 6 | 0 | -1.890363 | -3.237420 | -1.725966 |
| 20 | 6 | 0 | 0.731013  | -0.703159 | -2.277698 |
| 21 | 6 | 0 | 0.328050  | 1.950513  | -1.403857 |
| 22 | 6 | 0 | -5.107281 | -0.714138 | -2.041123 |
| 23 | 6 | 0 | -5.545537 | 1.037841  | -0.355803 |
| 24 | 6 | 0 | -0.114369 | 2.679895  | 0.929622  |
| 25 | 6 | 0 | -4.914121 | 2.213357  | 0.220687  |
| 26 | 6 | 0 | -2.773822 | 3.430996  | 0.050723  |
| 27 | 6 | 0 | -5.596544 | 0.012116  | 0.672229  |
| 28 | 6 | 0 | -4.616645 | 1.928994  | 1.608265  |
| 29 | 6 | 0 | -2.523830 | 3.214518  | 1.394206  |
| 30 | 6 | 0 | 0.252175  | -2.049580 | -1.984415 |
| 31 | 6 | 0 | -5.164882 | -1.700863 | -1.049368 |
| 32 | 6 | 0 | 1.428048  | 1.168882  | -0.888674 |
| 33 | 6 | 0 | -4.993682 | 0.548882  | 1.876166  |
| 34 | 6 | 0 | -3.467888 | 2.446111  | 2.195292  |
| 35 | 6 | 0 | -1.186293 | 2.884954  | 1.819412  |
| 36 | 6 | 0 | -1.320886 | 2.003587  | 2.942977  |
| 37 | 6 | 0 | 1.044964  | 1.902386  | 1.386585  |
| 38 | 6 | 0 | 1.662019  | -0.102874 | -1.343097 |
| 39 | 6 | 0 | 2.192280  | -2.387619 | -0.475137 |
| 40 | 6 | 0 | -2.685931 | 1.631704  | 3.097596  |
| 41 | 6 | 0 | -2.968054 | 0.269769  | 3.264554  |
| 42 | 6 | 0 | -1.933956 | -0.751688 | 3.370816  |
| 43 | 6 | 0 | -4.156004 | -0.259920 | 2.649804  |
| 44 | 6 | 0 | -4.214091 | -2.791681 | -1.064991 |
| 45 | 6 | 0 | 1.788957  | 0.274728  | 3.448905  |
| 46 | 6 | 0 | -5.391170 | -1.323885 | 0.338793  |
| 47 | 6 | 0 | -4.542143 | -2.157308 | 1.173633  |
| 48 | 6 | 0 | 0.958602  | 1.199922  | 2.582844  |
| 49 | 6 | 0 | 0.708323  | -2.603526 | -0.721105 |
| 50 | 6 | 0 | -0.226253 | -3.244669 | 0.098362  |
| 51 | 6 | 0 | -0.343158 | 1.077527  | 3.193756  |
| 52 | 6 | 0 | -0.618117 | -0.292263 | 3.568352  |
| 53 | 6 | 0 | -3.883893 | -1.626453 | 2.288151  |
| 54 | 6 | 0 | -2.504228 | -1.972587 | 2.658019  |
| 55 | 6 | 0 | 0.737145  | -0.798565 | 3.991824  |
| 56 | 6 | 0 | -3.840308 | -3.066135 | 0.313604  |
| 57 | 6 | 0 | -1.539920 | -3.494852 | -0.408379 |
| 58 | 6 | 0 | -2.532815 | -3.380975 | 0.642801  |
| 59 | 6 | 0 | -1.876815 | -2.923057 | 1.843321  |

Standard orientation:

| Center Number | Atomic Number | Atomic Type | Coordinates (Angstroms) |           |           |
|---------------|---------------|-------------|-------------------------|-----------|-----------|
|               |               |             | X                       | Y         | Z         |
| 1             | 6             | 0           | -3.722091               | 2.575897  | -1.908903 |
| 2             | 6             | 0           | -2.302557               | 2.791854  | -2.136838 |
| 3             | 6             | 0           | -1.603936               | 1.922893  | -2.959356 |
| 4             | 6             | 0           | -2.276712               | 0.799039  | -3.587709 |
| 5             | 6             | 0           | -3.630059               | 0.567133  | -3.341491 |
| 6             | 6             | 0           | -4.367226               | 1.475126  | -2.480051 |
| 7             | 6             | 0           | -1.693810               | 3.262759  | -0.906927 |
| 8             | 6             | 0           | -0.275957               | 1.514548  | -2.586709 |
| 9             | 6             | 0           | -1.338314               | -0.300443 | -3.601151 |
| 10            | 6             | 0           | -4.093253               | -0.785739 | -3.078568 |
| 11            | 6             | 0           | -5.286970               | 0.683049  | -1.681273 |
| 12            | 6             | 0           | -4.009453               | 2.962824  | -0.544091 |
| 13            | 6             | 0           | -3.182627               | -1.846387 | -3.093047 |
| 14            | 6             | 0           | -1.778337               | -1.598074 | -3.367989 |
| 15            | 6             | 0           | -3.250423               | -2.869574 | -2.068691 |
| 16            | 6             | 0           | -0.980599               | -2.455477 | -2.521910 |

|    |   |   |           |           |           |     |   |   |          |           |           |
|----|---|---|-----------|-----------|-----------|-----|---|---|----------|-----------|-----------|
| 60 | 6 | 0 | 2.159487  | 1.700380  | 0.333338  | 84  | 6 | 0 | 7.489190 | -1.527254 | 1.568281  |
| 61 | 6 | 0 | 2.800833  | -0.981101 | -0.847558 | 85  | 6 | 0 | 6.447382 | -2.454774 | 1.590965  |
| 62 | 6 | 0 | 3.563700  | -0.268292 | 0.320237  | 86  | 6 | 0 | 5.162491 | -2.090478 | 1.188132  |
| 63 | 7 | 0 | 3.236746  | 0.862637  | 0.814404  | 87  | 1 | 0 | 3.219998 | 3.479104  | 2.110226  |
| 64 | 6 | 0 | 3.827474  | -1.088426 | -2.015108 | 88  | 1 | 0 | 4.430199 | 5.617724  | 1.581402  |
| 65 | 6 | 0 | 2.860529  | 3.044218  | 0.030476  | 89  | 1 | 0 | 4.728396 | 6.256570  | -0.835159 |
| 66 | 8 | 0 | 2.848521  | -3.371130 | -0.200667 | 90  | 1 | 0 | 3.815914 | 4.728867  | -2.589059 |
| 67 | 8 | 0 | 2.908521  | 0.419780  | 3.860360  | 91  | 1 | 0 | 3.771620 | 1.054134  | -2.332005 |
| 68 | 6 | 0 | 3.354053  | 3.816936  | 1.087924  | 92  | 1 | 0 | 5.437011 | 1.044726  | -4.133846 |
| 69 | 6 | 0 | 4.034175  | 4.991912  | 0.786458  | 93  | 1 | 0 | 6.472105 | -1.097726 | -4.882606 |
| 70 | 6 | 0 | 4.204534  | 5.348042  | -0.554307 | 94  | 1 | 0 | 5.813087 | -3.223720 | -3.768536 |
| 71 | 6 | 0 | 3.693131  | 4.498678  | -1.532512 | 95  | 1 | 0 | 4.172786 | -3.218916 | -1.945299 |
| 72 | 7 | 0 | 3.033296  | 3.364585  | -1.253421 | 96  | 1 | 0 | 5.746994 | 1.167664  | 0.444659  |
| 73 | 6 | 0 | 4.208844  | 0.109521  | -2.642963 | 97  | 1 | 0 | 8.037656 | 0.513928  | 1.128754  |
| 74 | 6 | 0 | 5.154950  | 0.105538  | -3.665338 | 98  | 1 | 0 | 8.489371 | -1.819467 | 1.877712  |
| 75 | 6 | 0 | 5.735110  | -1.093072 | -4.084085 | 99  | 1 | 0 | 6.630266 | -3.471496 | 1.928470  |
| 76 | 6 | 0 | 5.364023  | -2.283095 | -3.460988 | 100 | 1 | 0 | 4.370612 | -2.822349 | 1.210807  |
| 77 | 6 | 0 | 4.421249  | -2.284720 | -2.429936 | 101 | 8 | 0 | 2.143872 | -1.628227 | 1.922569  |
| 78 | 8 | 0 | 0.995397  | -1.721513 | 4.722426  | 102 | 1 | 0 | 2.025170 | -2.498752 | 2.345308  |
| 79 | 6 | 0 | -0.407097 | -3.253163 | 1.626724  | 103 | 1 | 0 | 1.258517 | -1.429386 | 1.591744  |
| 80 | 8 | 0 | 0.396174  | -3.485273 | 2.505183  |     |   |   |          |           |           |
| 81 | 6 | 0 | 4.899359  | -0.781270 | 0.767124  |     |   |   |          |           |           |
| 82 | 6 | 0 | 5.951491  | 0.150240  | 0.761041  |     |   |   |          |           |           |
| 83 | 6 | 0 | 7.236051  | -0.219740 | 1.149775  |     |   |   |          |           |           |

-----  
An imaginary frequency was found at  $-34.29\text{ cm}^{-1}$ .  
The total electronic energy was calculated to be  $-3543.6715816$  Hartree.

**Table S32.** Optimized structure of INT5a (B3LYP-D3/6-31G(d))

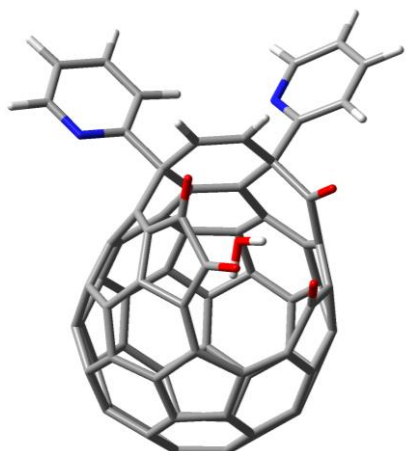

|    |   |   |           |           |           |    |   |   |           |           |           |
|----|---|---|-----------|-----------|-----------|----|---|---|-----------|-----------|-----------|
| 17 | 6 | 0 | 0.427738  | 2.359700  | -1.426304 | 17 | 6 | 0 | 0.427738  | 2.359700  | -1.426304 |
| 18 | 6 | 0 | 0.807268  | -1.144308 | -2.549532 | 18 | 6 | 0 | 0.807268  | -1.144308 | -2.549532 |
| 19 | 6 | 0 | -1.449039 | -3.685906 | -0.368791 | 19 | 6 | 0 | -1.449039 | -3.685906 | -0.368791 |
| 20 | 6 | 0 | 1.442832  | -1.647779 | -1.417020 | 20 | 6 | 0 | 1.442832  | -1.647779 | -1.417020 |
| 21 | 6 | 0 | 1.185753  | 1.153669  | -1.749951 | 21 | 6 | 0 | 1.185753  | 1.153669  | -1.749951 |
| 22 | 6 | 0 | -4.334684 | -1.368374 | -2.157924 | 22 | 6 | 0 | -4.334684 | -1.368374 | -2.157924 |
| 23 | 6 | 0 | -4.825146 | 0.934947  | -1.408910 | 23 | 6 | 0 | -4.825146 | 0.934947  | -1.408910 |
| 24 | 6 | 0 | 0.520643  | 2.849799  | -0.040415 | 24 | 6 | 0 | 0.520643  | 2.849799  | -0.040415 |
| 25 | 6 | 0 | -4.173119 | 2.225836  | -1.262240 | 25 | 6 | 0 | -4.173119 | 2.225836  | -1.262240 |
| 26 | 6 | 0 | -1.926495 | 3.206015  | -1.563496 | 26 | 6 | 0 | -1.926495 | 3.206015  | -1.563496 |
| 27 | 6 | 0 | -5.095137 | 0.422579  | -0.076368 | 27 | 6 | 0 | -5.095137 | 0.422579  | -0.076368 |
| 28 | 6 | 0 | -4.085732 | 2.529451  | 0.150426  | 28 | 6 | 0 | -4.085732 | 2.529451  | 0.150426  |
| 29 | 6 | 0 | -1.881625 | 3.568119  | -0.229943 | 29 | 6 | 0 | -1.881625 | 3.568119  | -0.229943 |
| 30 | 6 | 0 | 0.825626  | -2.780349 | -0.715313 | 30 | 6 | 0 | 0.825626  | -2.780349 | -0.715313 |
| 31 | 6 | 0 | -4.608850 | -1.860148 | -0.875486 | 31 | 6 | 0 | -4.608850 | -1.860148 | -0.875486 |
| 32 | 6 | 0 | 2.123985  | 0.619389  | -0.791888 | 32 | 6 | 0 | 2.123985  | 0.619389  | -0.791888 |
| 33 | 6 | 0 | -4.605808 | 1.388072  | 0.886612  | 33 | 6 | 0 | -4.605808 | 1.388072  | 0.886612  |
| 34 | 6 | 0 | -2.988105 | 3.218731  | 0.651106  | 34 | 6 | 0 | -2.988105 | 3.218731  | 0.651106  |
| 35 | 6 | 0 | -0.646226 | 3.430623  | 0.500587  | 35 | 6 | 0 | -0.646226 | 3.430623  | 0.500587  |
| 36 | 6 | 0 | -1.006972 | 3.107618  | 1.850606  | 36 | 6 | 0 | -1.006972 | 3.107618  | 1.850606  |
| 37 | 6 | 0 | 1.547005  | 2.338936  | 0.869232  | 37 | 6 | 0 | 1.547005  | 2.338936  | 0.869232  |
| 38 | 6 | 0 | 2.292265  | -0.743851 | -0.674817 | 38 | 6 | 0 | 2.292265  | -0.743851 | -0.674817 |
| 39 | 6 | 0 | 2.379904  | -2.388319 | 1.226798  | 39 | 6 | 0 | 2.379904  | -2.388319 | 1.226798  |
| 40 | 6 | 0 | -2.404331 | 2.835756  | 1.916378  | 40 | 6 | 0 | -2.404331 | 2.835756  | 1.916378  |
| 41 | 6 | 0 | -2.809167 | 1.658117  | 2.558667  | 41 | 6 | 0 | -2.809167 | 1.658117  | 2.558667  |
| 42 | 6 | 0 | -1.878780 | 0.751630  | 3.220636  | 42 | 6 | 0 | -1.878780 | 0.751630  | 3.220636  |
| 43 | 6 | 0 | -3.937553 | 0.944517  | 2.031748  | 43 | 6 | 0 | -3.937553 | 0.944517  | 2.031748  |
| 44 | 6 | 0 | -3.774201 | -2.897202 | -0.307742 | 44 | 6 | 0 | -3.774201 | -2.897202 | -0.307742 |
| 45 | 6 | 0 | 1.857017  | 1.557765  | 3.416099  | 45 | 6 | 0 | 1.857017  | 1.557765  | 3.416099  |
| 46 | 6 | 0 | -4.967092 | -0.936793 | 0.191221  | 46 | 6 | 0 | -4.967092 | -0.936793 | 0.191221  |
| 47 | 6 | 0 | -4.297906 | -1.376941 | 1.404158  | 47 | 6 | 0 | -4.297906 | -1.376941 | 1.404158  |
| 48 | 6 | 0 | 1.238642  | 2.233184  | 2.225860  | 48 | 6 | 0 | 1.238642  | 2.233184  | 2.225860  |
| 49 | 6 | 0 | 1.053744  | -2.866967 | 0.713787  | 49 | 6 | 0 | 1.053744  | -2.866967 | 0.713787  |
| 50 | 6 | 0 | -0.042796 | -3.102713 | 1.557096  | 50 | 6 | 0 | -0.042796 | -3.102713 | 1.557096  |
| 51 | 6 | 0 | -0.143730 | 2.379148  | 2.626616  | 51 | 6 | 0 | -0.143730 | 2.379148  | 2.626616  |
| 52 | 6 | 0 | -0.589807 | 1.265807  | 3.448101  | 52 | 6 | 0 | -0.589807 | 1.265807  | 3.448101  |
| 53 | 6 | 0 | -3.726469 | -0.456168 | 2.288424  | 53 | 6 | 0 | -3.726469 | -0.456168 | 2.288424  |
| 54 | 6 | 0 | -2.435122 | -0.661858 | 2.964968  | 54 | 6 | 0 | -2.435122 | -0.661858 | 2.964968  |
| 55 | 6 | 0 | 0.651696  | 0.858923  | 4.176395  | 55 | 6 | 0 | 0.651696  | 0.858923  | 4.176395  |

-----  
Standard orientation:  
-----  
Center Atomic Atomic Coordinates (Angstroms)  
Number Number Type X Y Z

|    |   |   |           |           |           |    |   |   |           |           |           |
|----|---|---|-----------|-----------|-----------|----|---|---|-----------|-----------|-----------|
| 56 | 6 | 0 | -3.595819 | -2.588429 | 1.104602  | 76 | 6 | 0 | 6.001099  | -3.870935 | -0.582180 |
| 57 | 6 | 0 | -1.301590 | -3.433314 | 0.990772  | 77 | 6 | 0 | 4.970308  | -3.272122 | 0.141572  |
| 58 | 6 | 0 | -2.382311 | -2.802460 | 1.732677  | 78 | 8 | 0 | 0.768362  | 0.215550  | 5.189680  |
| 59 | 6 | 0 | -1.815443 | -1.905370 | 2.718331  | 79 | 6 | 0 | -0.375555 | -2.416625 | 2.896143  |
| 60 | 6 | 0 | 2.749073  | 1.627036  | 0.182102  | 80 | 8 | 0 | 0.331051  | -2.249357 | 3.863464  |
| 61 | 6 | 0 | 3.201338  | -1.392390 | 0.339713  | 81 | 1 | 0 | 4.586816  | -0.779967 | 1.947526  |
| 62 | 6 | 0 | 3.891716  | -0.373255 | 1.219874  | 82 | 1 | 0 | 4.238114  | 1.603658  | 1.807036  |
| 63 | 6 | 0 | 3.696995  | 0.941934  | 1.140727  | 83 | 1 | 0 | 4.609074  | 1.098702  | -1.748132 |
| 64 | 6 | 0 | 4.319540  | -2.163255 | -0.411600 | 84 | 1 | 0 | 6.015404  | 2.764164  | -2.994274 |
| 65 | 6 | 0 | 3.597850  | 2.639331  | -0.617744 | 85 | 1 | 0 | 5.723373  | 5.210095  | -2.475757 |
| 66 | 8 | 0 | 2.822554  | -2.792469 | 2.286483  | 86 | 1 | 0 | 4.052170  | 5.863332  | -0.737863 |
| 67 | 8 | 0 | 2.985056  | 1.560643  | 3.844053  | 87 | 1 | 0 | 5.903099  | -1.774641 | -3.240273 |
| 68 | 6 | 0 | 4.517558  | 2.166369  | -1.565218 | 88 | 1 | 0 | 7.148291  | -3.782560 | -2.420830 |
| 69 | 6 | 0 | 5.295766  | 3.094020  | -2.249682 | 89 | 1 | 0 | 6.519270  | -4.735852 | -0.177159 |
| 70 | 6 | 0 | 5.137346  | 4.452551  | -1.964211 | 90 | 1 | 0 | 4.683731  | -3.651255 | 1.115083  |
| 71 | 6 | 0 | 4.203879  | 4.816825  | -0.996284 | 91 | 8 | 0 | 1.109402  | -0.384733 | 1.873507  |
| 72 | 7 | 0 | 3.444605  | 3.934695  | -0.330168 | 92 | 1 | 0 | 1.257302  | -0.900944 | 2.682745  |
| 73 | 7 | 0 | 4.666062  | -1.643438 | -1.599111 | 93 | 1 | 0 | 0.149916  | -0.356378 | 1.752377  |
| 74 | 6 | 0 | 5.656811  | -2.227026 | -2.281179 |    |   |   |           |           |           |
| 75 | 6 | 0 | 6.353908  | -3.345605 | -1.823698 |    |   |   |           |           |           |

-----  
The total electronic energy was calculated to be -3312.614949 Hartree.

**Table S33.** Optimized structure of **INT5b** (B3LYP-D3/6-31G(d))

|  |  |  |  |  |  |    |   |   |           |           |           |
|--|--|--|--|--|--|----|---|---|-----------|-----------|-----------|
|  |  |  |  |  |  | 21 | 6 | 0 | 1.217614  | 1.027981  | -1.814348 |
|  |  |  |  |  |  | 22 | 6 | 0 | -4.324273 | -1.479057 | -2.098644 |
|  |  |  |  |  |  | 23 | 6 | 0 | -4.806117 | 0.873676  | -1.514795 |
|  |  |  |  |  |  | 24 | 6 | 0 | 0.540310  | 2.833168  | -0.226642 |
|  |  |  |  |  |  | 25 | 6 | 0 | -4.143827 | 2.165501  | -1.450000 |
|  |  |  |  |  |  | 26 | 6 | 0 | -1.886868 | 3.105652  | -1.794332 |
|  |  |  |  |  |  | 27 | 6 | 0 | -5.093201 | 0.455975  | -0.152666 |
|  |  |  |  |  |  | 28 | 6 | 0 | -4.068736 | 2.565294  | -0.060784 |
|  |  |  |  |  |  | 29 | 6 | 0 | -1.853298 | 3.559233  | -0.488833 |
|  |  |  |  |  |  | 30 | 6 | 0 | 0.809053  | -2.820826 | -0.508345 |
|  |  |  |  |  |  | 31 | 6 | 0 | -4.614612 | -1.879193 | -0.788558 |
|  |  |  |  |  |  | 32 | 6 | 0 | 2.145695  | 0.556186  | -0.814782 |
|  |  |  |  |  |  | 33 | 6 | 0 | -4.606070 | 1.481626  | 0.747078  |
|  |  |  |  |  |  | 34 | 6 | 0 | -2.971244 | 3.279783  | 0.402695  |
|  |  |  |  |  |  | 35 | 6 | 0 | -0.626787 | 3.460055  | 0.262194  |
|  |  |  |  |  |  | 36 | 6 | 0 | -1.003648 | 3.234333  | 1.627554  |
|  |  |  |  |  |  | 37 | 6 | 0 | 1.549876  | 2.372257  | 0.729084  |
|  |  |  |  |  |  | 38 | 6 | 0 | 2.289000  | -0.797402 | -0.591522 |
|  |  |  |  |  |  | 39 | 6 | 0 | 2.353060  | -2.304178 | 1.415373  |
|  |  |  |  |  |  | 40 | 6 | 0 | -2.404236 | 2.980876  | 1.697628  |
|  |  |  |  |  |  | 41 | 6 | 0 | -2.824088 | 1.853037  | 2.415353  |
|  |  |  |  |  |  | 42 | 6 | 0 | -1.907637 | 0.987001  | 3.148578  |
|  |  |  |  |  |  | 43 | 6 | 0 | -3.953405 | 1.113192  | 1.927756  |
|  |  |  |  |  |  | 44 | 6 | 0 | -3.794442 | -2.880704 | -0.142021 |
|  |  |  |  |  |  | 45 | 6 | 0 | 1.831091  | 1.778992  | 3.330586  |
|  |  |  |  |  |  | 46 | 6 | 0 | -4.976718 | -0.882387 | 0.208477  |
|  |  |  |  |  |  | 47 | 6 | 0 | -4.323916 | -1.243213 | 1.455991  |
|  |  |  |  |  |  | 48 | 6 | 0 | 1.227546  | 2.368604  | 2.087162  |
|  |  |  |  |  |  | 49 | 6 | 0 | 1.025138  | -2.809388 | 0.925043  |
|  |  |  |  |  |  | 50 | 6 | 0 | -0.081801 | -2.979246 | 1.771146  |
|  |  |  |  |  |  | 51 | 6 | 0 | -0.155567 | 2.555371  | 2.462908  |
|  |  |  |  |  |  | 52 | 6 | 0 | -0.617846 | 1.505916  | 3.357060  |
|  |  |  |  |  |  | 53 | 6 | 0 | -3.755358 | -0.268087 | 2.281757  |
|  |  |  |  |  |  | 54 | 6 | 0 | -2.472875 | -0.436476 | 2.984554  |
|  |  |  |  |  |  | 55 | 6 | 0 | 0.613995  | 1.139046  | 4.123188  |
|  |  |  |  |  |  | 56 | 6 | 0 | -3.627904 | -2.477024 | 1.247501  |
|  |  |  |  |  |  | 57 | 6 | 0 | -1.337711 | -3.340490 | 1.215628  |
|  |  |  |  |  |  | 58 | 6 | 0 | -2.422170 | -2.655688 | 1.901527  |
|  |  |  |  |  |  | 59 | 6 | 0 | -1.859658 | -1.697404 | 2.830243  |
|  |  |  |  |  |  | 60 | 6 | 0 | 2.762995  | 1.619296  | 0.103188  |
|  |  |  |  |  |  | 61 | 6 | 0 | 3.191884  | -1.388695 | 0.465537  |
|  |  |  |  |  |  | 62 | 6 | 0 | 3.882067  | -0.319401 | 1.278803  |
|  |  |  |  |  |  | 63 | 6 | 0 | 3.699417  | 0.989456  | 1.113210  |

  

| Standard orientation: |               |             |                         |           |           |  |
|-----------------------|---------------|-------------|-------------------------|-----------|-----------|--|
| Center Number         | Atomic Number | Atomic Type | Coordinates (Angstroms) |           |           |  |
|                       |               |             | X                       | Y         | Z         |  |
| 1                     | 6             | 0           | -2.635009               | 1.444936  | -3.261999 |  |
| 2                     | 6             | 0           | -1.182325               | 1.487784  | -3.307488 |  |
| 3                     | 6             | 0           | -0.473357               | 0.314439  | -3.493490 |  |
| 4                     | 6             | 0           | -1.165688               | -0.952878 | -3.648456 |  |
| 5                     | 6             | 0           | -2.557117               | -1.004139 | -3.567765 |  |
| 6                     | 6             | 0           | -3.306946               | 0.223185  | -3.363726 |  |
| 7                     | 6             | 0           | -0.704881               | 2.469506  | -2.351852 |  |
| 8                     | 6             | 0           | 0.733172                | 0.094578  | -2.741173 |  |
| 9                     | 6             | 0           | -0.359168               | -1.954246 | -2.989863 |  |
| 10                    | 6             | 0           | -3.192892               | -2.060954 | -2.798928 |  |
| 11                    | 6             | 0           | -4.405766               | -0.072749 | -2.460425 |  |
| 12                    | 6             | 0           | -3.069153               | 2.440929  | -2.306866 |  |
| 13                    | 6             | 0           | -2.407254               | -3.032145 | -2.170290 |  |
| 14                    | 6             | 0           | -0.960004               | -2.983465 | -2.276749 |  |
| 15                    | 6             | 0           | -2.724154               | -3.458198 | -0.822384 |  |
| 16                    | 6             | 0           | -0.381051               | -3.383852 | -1.012831 |  |
| 17                    | 6             | 0           | 0.461423                | 2.254985  | -1.579670 |  |
| 18                    | 6             | 0           | 0.822327                | -1.317468 | -2.453177 |  |
| 19                    | 6             | 0           | -1.474025               | -3.686485 | -0.124115 |  |
| 20                    | 6             | 0           | 1.440191                | -1.743678 | -1.280362 |  |

|    |   |   |           |           |           |    |   |   |          |           |           |
|----|---|---|-----------|-----------|-----------|----|---|---|----------|-----------|-----------|
| 64 | 6 | 0 | 4.283866  | -2.228654 | -0.250567 | 81 | 1 | 0 | 4.571667 | -0.684030 | 2.033075  |
| 65 | 6 | 0 | 3.632362  | 2.582450  | -0.735037 | 82 | 1 | 0 | 4.246868 | 1.687537  | 1.736245  |
| 66 | 8 | 0 | 2.778689  | -2.632358 | 2.506868  | 83 | 1 | 0 | 3.227006 | 4.341564  | 0.449902  |
| 67 | 8 | 0 | 2.953873  | 1.822369  | 3.768975  | 84 | 1 | 0 | 4.761242 | 5.779439  | -0.903067 |
| 68 | 6 | 0 | 3.775980  | 3.930302  | -0.390869 | 85 | 1 | 0 | 5.988354 | 4.740442  | -2.839854 |
| 69 | 6 | 0 | 4.632008  | 4.728733  | -1.147906 | 86 | 1 | 0 | 5.626967 | 2.310644  | -3.302798 |
| 70 | 6 | 0 | 5.314386  | 4.156896  | -2.220422 | 87 | 1 | 0 | 4.775763 | -0.583843 | -1.560118 |
| 71 | 6 | 0 | 5.111009  | 2.800467  | -2.478925 | 88 | 1 | 0 | 6.541564 | -1.821124 | -2.770733 |
| 72 | 7 | 0 | 4.295329  | 2.024785  | -1.757788 | 89 | 1 | 0 | 7.072443 | -4.174854 | -2.150380 |
| 73 | 6 | 0 | 4.999374  | -1.613218 | -1.290207 | 90 | 1 | 0 | 5.825841 | -5.263701 | -0.292969 |
| 74 | 6 | 0 | 5.996095  | -2.310915 | -1.968181 | 91 | 1 | 0 | 4.080805 | -4.032963 | 0.924090  |
| 75 | 6 | 0 | 6.295972  | -3.630649 | -1.619426 | 92 | 8 | 0 | 1.090062 | -0.249663 | 1.923986  |
| 76 | 6 | 0 | 5.596191  | -4.241063 | -0.580271 | 93 | 1 | 0 | 1.238896 | -0.734665 | 2.752424  |
| 77 | 6 | 0 | 4.596646  | -3.544229 | 0.105362  | 94 | 1 | 0 | 0.132698 | -0.255159 | 1.785140  |
| 78 | 8 | 0 | 0.716293  | 0.568710  | 5.180266  |    |   |   |          |           |           |
| 79 | 6 | 0 | -0.424114 | -2.204398 | 3.057824  |    |   |   |          |           |           |
| 80 | 8 | 0 | 0.271785  | -1.975746 | 4.020131  |    |   |   |          |           |           |

The total electronic energy was calculated to be -3296.5760824 Hartree.

**Table S34.** Optimized structure of INT5c (B3LYP-D3/6-31G(d))

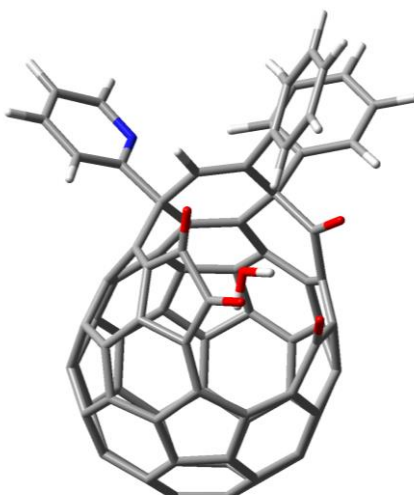

|    |   |   |           |           |           |
|----|---|---|-----------|-----------|-----------|
| 22 | 6 | 0 | -4.999119 | -1.176770 | -1.929016 |
| 23 | 6 | 0 | -5.545943 | 0.733241  | -0.459534 |
| 24 | 6 | 0 | -0.230660 | 2.875844  | 0.636070  |
| 25 | 6 | 0 | -4.991732 | 2.005226  | -0.027421 |
| 26 | 6 | 0 | -2.927348 | 3.323157  | -0.339363 |
| 27 | 6 | 0 | -5.531622 | -0.165737 | 0.681809  |
| 28 | 6 | 0 | -4.683990 | 1.907035  | 1.383622  |
| 29 | 6 | 0 | -2.680000 | 3.297067  | 1.020692  |
| 30 | 6 | 0 | 0.433875  | -2.225323 | -1.734243 |
| 31 | 6 | 0 | -4.999120 | -2.042593 | -0.827972 |
| 32 | 6 | 0 | 1.406396  | 1.192691  | -0.969695 |
| 33 | 6 | 0 | -4.964947 | 0.544916  | 1.810109  |
| 34 | 6 | 0 | -3.579858 | 2.568796  | 1.905963  |
| 35 | 6 | 0 | -1.327938 | 3.122703  | 1.489772  |
| 36 | 6 | 0 | -1.417361 | 2.387669  | 2.718675  |
| 37 | 6 | 0 | 0.977760  | 2.260669  | 1.193368  |
| 38 | 6 | 0 | 1.706885  | -0.113469 | -1.282138 |
| 39 | 6 | 0 | 2.294286  | -2.201558 | -0.034699 |
| 40 | 6 | 0 | -2.751774 | 1.924854  | 2.899984  |
| 41 | 6 | 0 | -2.929983 | 0.569854  | 3.209475  |
| 42 | 6 | 0 | -1.821538 | -0.354023 | 3.427198  |
| 43 | 6 | 0 | -4.068553 | -0.110118 | 2.660123  |
| 44 | 6 | 0 | -3.991233 | -3.075953 | -0.723428 |
| 45 | 6 | 0 | 1.801750  | 0.883841  | 3.334195  |
| 46 | 6 | 0 | -5.241404 | -1.515130 | 0.507024  |
| 47 | 6 | 0 | -4.333792 | -2.186163 | 1.422971  |
| 48 | 6 | 0 | 0.921827  | 1.753564  | 2.490115  |
| 49 | 6 | 0 | 0.918929  | -2.663572 | -0.442954 |
| 50 | 6 | 0 | 0.015716  | -3.272502 | 0.440302  |
| 51 | 6 | 0 | -0.373309 | 1.592209  | 3.109769  |
| 52 | 6 | 0 | -0.560716 | 0.241812  | 3.614481  |
| 53 | 6 | 0 | -3.696514 | -1.484504 | 2.451230  |
| 54 | 6 | 0 | -2.294121 | -1.698162 | 2.842789  |
| 55 | 6 | 0 | 0.826941  | -0.174131 | 4.001395  |
| 56 | 6 | 0 | -3.593261 | -3.157465 | 0.675219  |
| 57 | 6 | 0 | -1.288917 | -3.607476 | -0.014066 |
| 58 | 6 | 0 | -0.136638 | -3.059104 | 1.956285  |
| 59 | 6 | 0 | -2.273770 | -3.373430 | 1.029379  |
| 60 | 6 | 0 | -1.623514 | -2.726199 | 2.149964  |
| 61 | 6 | 0 | 2.104823  | 1.947444  | 0.161988  |
| 62 | 6 | 0 | 2.865372  | -0.895613 | -0.694960 |
| 63 | 6 | 0 | 3.662675  | -0.070593 | 0.324620  |
| 64 | 6 | 0 | 3.285305  | 1.160318  | 0.693129  |
| 65 | 6 | 0 | 3.799442  | -1.274097 | -1.875530 |
| 66 | 6 | 0 | 2.712021  | 3.257389  | -0.390423 |
| 67 | 8 | 0 | 2.948551  | -2.881861 | 0.730806  |

Standard orientation:

| Center Number | Atomic Number | Atomic Type | Coordinates (Angstroms) |           |           |
|---------------|---------------|-------------|-------------------------|-----------|-----------|
|               |               |             | X                       | Y         | Z         |
| 1             | 6             | 0           | -3.806083               | 2.180534  | -2.181869 |
| 2             | 6             | 0           | -2.397837               | 2.446209  | -2.426228 |
| 3             | 6             | 0           | -1.644499               | 1.525026  | -3.132604 |
| 4             | 6             | 0           | -2.248824               | 0.303387  | -3.633970 |
| 5             | 6             | 0           | -3.590499               | 0.026863  | -3.369951 |
| 6             | 6             | 0           | -4.384257               | 0.985880  | -2.621513 |
| 7             | 6             | 0           | -1.827163               | 3.095193  | -1.261618 |
| 8             | 6             | 0           | -0.302702               | 1.235303  | -2.702726 |
| 9             | 6             | 0           | -1.252406               | -0.736194 | -3.517926 |
| 10            | 6             | 0           | -3.979360               | -1.310284 | -2.954502 |
| 11            | 6             | 0           | -5.261653               | 0.240503  | -1.734732 |
| 12            | 6             | 0           | -4.127828               | 2.711798  | -0.875312 |
| 13            | 6             | 0           | -3.011961               | -2.314373 | -2.850428 |
| 14            | 6             | 0           | -1.621289               | -2.023912 | -3.150194 |
| 15            | 6             | 0           | -3.028091               | -3.220546 | -1.720182 |
| 16            | 6             | 0           | -0.780020               | -2.747148 | -2.223233 |
| 17            | 6             | 0           | -0.522009               | 2.794344  | -0.804517 |
| 18            | 6             | 0           | -0.044269               | -0.160744 | -2.969931 |
| 19            | 6             | 0           | -1.652437               | -3.491427 | -1.350476 |
| 20            | 6             | 0           | 0.818855                | -0.871480 | -2.141345 |
| 21            | 6             | 0           | 0.269347                | 1.844418  | -1.579064 |

|    |   |   |          |           |           |     |   |   |          |           |           |
|----|---|---|----------|-----------|-----------|-----|---|---|----------|-----------|-----------|
| 68 | 8 | 0 | 2.976835 | 0.965223  | 3.596177  | 88  | 1 | 0 | 2.489564 | 4.385224  | 1.437033  |
| 69 | 6 | 0 | 2.856978 | 4.390719  | 0.415987  | 89  | 1 | 0 | 3.605950 | 6.412112  | 0.486676  |
| 70 | 6 | 0 | 3.480069 | 5.517654  | -0.117220 | 90  | 1 | 0 | 4.424125 | 6.330011  | -1.892512 |
| 71 | 6 | 0 | 3.935789 | 5.475699  | -1.434107 | 91  | 1 | 0 | 4.094231 | 4.216589  | -3.185225 |
| 72 | 6 | 0 | 3.750327 | 4.295530  | -2.155473 | 92  | 1 | 0 | 3.744266 | 0.741058  | -2.651758 |
| 73 | 7 | 0 | 3.157752 | 3.207316  | -1.653091 | 93  | 1 | 0 | 5.276459 | 0.269112  | -4.532019 |
| 74 | 6 | 0 | 4.142857 | -0.261551 | -2.786097 | 94  | 1 | 0 | 6.237237 | -2.011399 | -4.823225 |
| 75 | 6 | 0 | 5.015912 | -0.526499 | -3.838791 | 95  | 1 | 0 | 5.648806 | -3.804679 | -3.201500 |
| 76 | 6 | 0 | 5.557278 | -1.804889 | -4.001058 | 96  | 1 | 0 | 4.139089 | -3.332596 | -1.318805 |
| 77 | 6 | 0 | 5.224468 | -2.809998 | -3.094861 | 97  | 1 | 0 | 8.198846 | -1.185871 | 0.160985  |
| 78 | 6 | 0 | 4.354115 | -2.547210 | -2.033349 | 98  | 1 | 0 | 6.126542 | -0.284886 | -0.837018 |
| 79 | 8 | 0 | 0.710986 | -3.082567 | 2.820560  | 99  | 1 | 0 | 4.008516 | -1.112037 | 2.811054  |
| 80 | 8 | 0 | 1.187330 | -1.058031 | 4.738169  | 100 | 1 | 0 | 6.073816 | -2.007753 | 3.811983  |
| 81 | 6 | 0 | 7.280959 | -1.177422 | 0.743413  | 101 | 1 | 0 | 8.185382 | -2.060459 | 2.492061  |
| 82 | 6 | 0 | 6.110943 | -0.670378 | 0.176857  | 102 | 8 | 0 | 1.149365 | -0.687034 | 1.493797  |
| 83 | 6 | 0 | 4.915234 | -0.647458 | 0.910054  | 103 | 1 | 0 | 1.434551 | -1.448702 | 2.027908  |
| 84 | 6 | 0 | 4.920267 | -1.131522 | 2.226101  | 104 | 1 | 0 | 0.184369 | -0.743964 | 1.452211  |
| 85 | 6 | 0 | 6.090575 | -1.635957 | 2.791079  |     |   |   |          |           |           |
| 86 | 6 | 0 | 7.273912 | -1.664935 | 2.050960  |     |   |   |          |           |           |
| 87 | 1 | 0 | 3.899274 | 1.690699  | 1.413036  |     |   |   |          |           |           |

The total electronic energy was calculated to be -3527.6430779 Hartree.

**Table S35.** Optimized structure of **INT5d** (B3LYP-D3/6-31G(d))

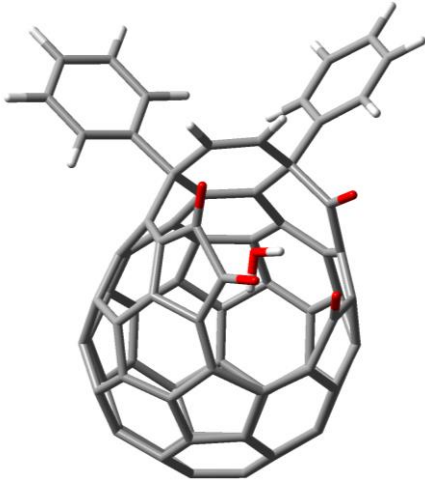

|    |   |   |           |           |           |
|----|---|---|-----------|-----------|-----------|
| 21 | 6 | 0 | 1.164048  | 1.175300  | -1.768177 |
| 22 | 6 | 0 | -4.341749 | -1.399721 | -2.138428 |
| 23 | 6 | 0 | -4.848632 | 0.899285  | -1.386991 |
| 24 | 6 | 0 | 0.486377  | 2.856395  | -0.051934 |
| 25 | 6 | 0 | -4.206862 | 2.195611  | -1.244280 |
| 26 | 6 | 0 | -1.970901 | 3.194765  | -1.558648 |
| 27 | 6 | 0 | -5.106451 | 0.384727  | -0.052879 |
| 28 | 6 | 0 | -4.114191 | 2.500243  | 0.167972  |
| 29 | 6 | 0 | -1.922173 | 3.557809  | -0.225565 |
| 30 | 6 | 0 | 0.838707  | -2.763307 | -0.722844 |
| 31 | 6 | 0 | -4.603925 | -1.893729 | -0.854435 |
| 32 | 6 | 0 | 2.119126  | 0.653616  | -0.817593 |
| 33 | 6 | 0 | -4.619910 | 1.354394  | 0.907191  |
| 34 | 6 | 0 | -3.020244 | 3.199644  | 0.662402  |
| 35 | 6 | 0 | -0.681592 | 3.428335  | 0.497317  |
| 36 | 6 | 0 | -1.030711 | 3.102570  | 1.849549  |
| 37 | 6 | 0 | 1.522160  | 2.350946  | 0.851102  |
| 38 | 6 | 0 | 2.291041  | -0.712112 | -0.692137 |
| 39 | 6 | 0 | 2.393525  | -2.341637 | 1.215535  |
| 40 | 6 | 0 | -2.425949 | 2.821703  | 1.924393  |
| 41 | 6 | 0 | -2.816480 | 1.640659  | 2.569101  |
| 42 | 6 | 0 | -1.874470 | 0.741941  | 3.226209  |
| 43 | 6 | 0 | -3.941718 | 0.917087  | 2.048917  |
| 44 | 6 | 0 | -3.757146 | -2.923529 | -0.291022 |
| 45 | 6 | 0 | 1.855756  | 1.577605  | 3.398762  |
| 46 | 6 | 0 | -4.964256 | -0.973383 | 0.214087  |
| 47 | 6 | 0 | -4.284755 | -1.407658 | 1.423436  |
| 48 | 6 | 0 | 1.223179  | 2.245834  | 2.210715  |
| 49 | 6 | 0 | 1.077861  | -2.849978 | 0.703524  |
| 50 | 6 | 0 | -0.011998 | -3.095884 | 1.553339  |
| 51 | 6 | 0 | -0.156857 | 2.382044  | 2.621290  |
| 52 | 6 | 0 | -0.588686 | 1.265861  | 3.447153  |
| 53 | 6 | 0 | -3.717042 | -0.481627 | 2.304578  |
| 54 | 6 | 0 | -2.420437 | -0.676066 | 2.973582  |
| 55 | 6 | 0 | 0.661210  | 0.866715  | 4.165676  |
| 56 | 6 | 0 | -3.573446 | -2.612841 | 1.120107  |
| 57 | 6 | 0 | -1.271429 | -3.437353 | 0.994167  |
| 58 | 6 | 0 | -2.354295 | -2.816096 | 1.741395  |
| 59 | 6 | 0 | -1.790227 | -1.912973 | 2.722439  |
| 60 | 6 | 0 | 2.740970  | 1.671279  | 0.154619  |
| 61 | 6 | 0 | 3.215775  | -1.358164 | 0.310245  |
| 62 | 6 | 0 | 3.901262  | -0.328693 | 1.181408  |
| 63 | 6 | 0 | 3.692928  | 0.984909  | 1.108940  |

Standard orientation:

| Center Number | Atomic Number | Atomic Type | Coordinates (Angstroms) |           |           |
|---------------|---------------|-------------|-------------------------|-----------|-----------|
|               |               |             | X                       | Y         | Z         |
| 1             | 6             | 0           | -2.717367               | 1.624395  | -3.124038 |
| 2             | 6             | 0           | -1.266793               | 1.694219  | -3.188610 |
| 3             | 6             | 0           | -0.542529               | 0.548956  | -3.467465 |
| 4             | 6             | 0           | -1.217050               | -0.716159 | -3.697489 |
| 5             | 6             | 0           | -2.606179               | -0.796155 | -3.598608 |
| 6             | 6             | 0           | -3.371275               | 0.401447  | -3.299241 |
| 7             | 6             | 0           | -0.788699               | 2.616906  | -2.176032 |
| 8             | 6             | 0           | 0.678517                | 0.298809  | -2.747915 |
| 9             | 6             | 0           | -0.384699               | -1.746457 | -3.120659 |
| 10            | 6             | 0           | -3.212590               | -1.913108 | -2.893870 |
| 11            | 6             | 0           | -4.450852               | 0.026356  | -2.401697 |
| 12            | 6             | 0           | -3.150774               | 2.546296  | -2.096705 |
| 13            | 6             | 0           | -2.401911               | -2.911833 | -2.345787 |
| 14            | 6             | 0           | -0.957668               | -2.831350 | -2.470566 |
| 15            | 6             | 0           | -2.689435               | -3.434892 | -1.025848 |
| 16            | 6             | 0           | -0.351339               | -3.309100 | -1.246734 |
| 17            | 6             | 0           | 0.393042                | 2.370760  | -1.439001 |
| 18            | 6             | 0           | 0.794065                | -1.127811 | -2.557607 |
| 19            | 6             | 0           | -1.424727               | -3.690953 | -0.364629 |
| 20            | 6             | 0           | 1.437652                | -1.622546 | -1.425951 |



|    |   |   |           |           |           |    |   |   |          |           |           |
|----|---|---|-----------|-----------|-----------|----|---|---|----------|-----------|-----------|
| 64 | 6 | 0 | 4.321635  | -2.180740 | -0.411699 | 81 | 1 | 0 | 4.612717 | -0.724796 | 1.898340  |
| 65 | 6 | 0 | 3.580529  | 2.704062  | -0.634851 | 82 | 1 | 0 | 4.241417 | 1.647976  | 1.767687  |
| 66 | 8 | 0 | 2.820164  | -2.703209 | 2.296301  | 83 | 1 | 0 | 4.548751 | 1.179840  | -1.810408 |
| 67 | 8 | 0 | 2.985051  | 1.599539  | 3.821409  | 84 | 1 | 0 | 5.972265 | 2.764790  | -3.063793 |
| 68 | 6 | 0 | 4.477296  | 2.245208  | -1.609653 | 85 | 1 | 0 | 5.848332 | 5.205394  | -2.581343 |
| 69 | 6 | 0 | 5.286154  | 3.138413  | -2.308351 | 86 | 1 | 0 | 4.289291 | 6.030893  | -0.826102 |
| 70 | 6 | 0 | 5.218946  | 4.507476  | -2.036050 | 87 | 1 | 0 | 2.856621 | 4.445779  | 0.408291  |
| 71 | 6 | 0 | 4.343784  | 4.969733  | -1.054050 | 88 | 1 | 0 | 4.055260 | -1.228926 | -2.332425 |
| 72 | 6 | 0 | 3.531402  | 4.072750  | -0.355803 | 89 | 1 | 0 | 5.886472 | -2.446771 | -3.430749 |
| 73 | 6 | 0 | 4.628858  | -1.949984 | -1.759880 | 90 | 1 | 0 | 7.226950 | -4.115924 | -2.157110 |
| 74 | 6 | 0 | 5.667735  | -2.641391 | -2.384131 | 91 | 1 | 0 | 6.707801 | -4.524815 | 0.243991  |
| 75 | 6 | 0 | 6.419693  | -3.575046 | -1.670945 | 92 | 1 | 0 | 4.879461 | -3.296638 | 1.348430  |
| 76 | 6 | 0 | 6.127533  | -3.803969 | -0.325710 | 93 | 8 | 0 | 1.063168 | -0.347074 | 1.810121  |
| 77 | 6 | 0 | 5.090725  | -3.111894 | 0.300884  | 94 | 1 | 0 | 1.246051 | -0.857836 | 2.615071  |
| 78 | 8 | 0 | 0.790508  | 0.227941  | 5.179788  | 95 | 1 | 0 | 0.101123 | -0.350975 | 1.710048  |
| 79 | 6 | 0 | -0.342895 | -2.408791 | 2.892753  |    |   |   |          |           |           |
| 80 | 8 | 0 | 0.365910  | -2.226795 | 3.854931  |    |   |   |          |           |           |

The total electronic energy was calculated to be -3280.5360922 Hartree.

**Table S36.** Optimized structure of INT5e (B3LYP-D3/6-31G(d))

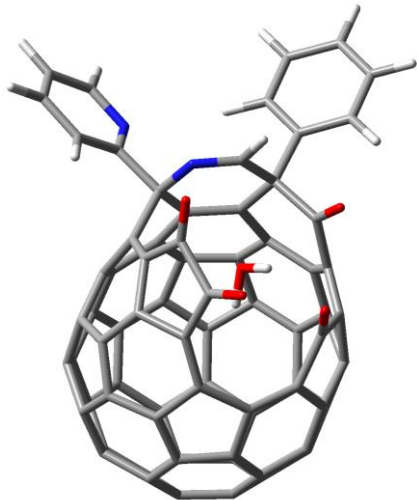

|    |   |   |           |           |           |
|----|---|---|-----------|-----------|-----------|
| 22 | 6 | 0 | -4.414098 | -1.396584 | -2.042081 |
| 23 | 6 | 0 | -4.842155 | 0.955731  | -1.416004 |
| 24 | 6 | 0 | 0.565880  | 2.804639  | -0.228851 |
| 25 | 6 | 0 | -4.157268 | 2.235854  | -1.350385 |
| 26 | 6 | 0 | -1.893765 | 3.142899  | -1.736273 |
| 27 | 6 | 0 | -5.103366 | 0.524678  | -0.052934 |
| 28 | 6 | 0 | -4.041846 | 2.615609  | 0.041657  |
| 29 | 6 | 0 | -1.819996 | 3.577426  | -0.425986 |
| 30 | 6 | 0 | 0.734833  | -2.843492 | -0.595032 |
| 31 | 6 | 0 | -4.679198 | -1.809361 | -0.730522 |
| 32 | 6 | 0 | 2.109203  | 0.513897  | -0.894104 |
| 33 | 6 | 0 | -4.577950 | 1.530302  | 0.847984  |
| 34 | 6 | 0 | -2.921328 | 3.305209  | 0.487975  |
| 35 | 6 | 0 | -0.577674 | 3.447854  | 0.294884  |
| 36 | 6 | 0 | -0.926196 | 3.212357  | 1.665808  |
| 37 | 6 | 0 | 1.583800  | 2.312569  | 0.701052  |
| 38 | 6 | 0 | 2.236688  | -0.841640 | -0.693697 |
| 39 | 6 | 0 | 2.323478  | -2.356891 | 1.304959  |
| 40 | 6 | 0 | -2.328952 | 2.980571  | 1.765092  |
| 41 | 6 | 0 | -2.751659 | 1.851233  | 2.478487  |
| 42 | 6 | 0 | -1.832823 | 0.961639  | 3.179220  |
| 43 | 6 | 0 | -3.903590 | 1.135794  | 2.007686  |
| 44 | 6 | 0 | -3.859932 | -2.832452 | -0.117307 |
| 45 | 6 | 0 | 1.924152  | 1.699109  | 3.301102  |
| 46 | 6 | 0 | -5.000359 | -0.820142 | 0.287861  |
| 47 | 6 | 0 | -4.323438 | -1.207985 | 1.514137  |
| 48 | 6 | 0 | 1.302450  | 2.305335  | 2.068659  |
| 49 | 6 | 0 | 0.983605  | -2.848659 | 0.833369  |
| 50 | 6 | 0 | -0.105064 | -3.016361 | 1.703615  |
| 51 | 6 | 0 | -0.069530 | 2.512320  | 2.475527  |
| 52 | 6 | 0 | -0.530957 | 1.458296  | 3.365966  |
| 53 | 6 | 0 | -3.719328 | -0.253146 | 2.338355  |
| 54 | 6 | 0 | -2.423825 | -0.451185 | 3.008510  |
| 55 | 6 | 0 | 0.709777  | 1.059688  | 4.101354  |
| 56 | 6 | 0 | -3.653106 | -2.450058 | 1.272874  |
| 57 | 6 | 0 | -1.379134 | -3.351177 | 1.174528  |
| 58 | 6 | 0 | -2.435540 | -2.657215 | 1.895368  |
| 59 | 6 | 0 | -1.835708 | -1.720324 | 2.822712  |
| 60 | 6 | 0 | 2.761678  | 1.524597  | 0.052073  |
| 61 | 6 | 0 | 3.138439  | -1.417552 | 0.362278  |
| 62 | 6 | 0 | 3.766477  | -0.307624 | 1.203946  |
| 63 | 7 | 0 | 3.625082  | 0.946119  | 1.076280  |
| 64 | 6 | 0 | 4.306513  | -2.181245 | -0.311063 |
| 65 | 6 | 0 | 3.687279  | 2.478771  | -0.732632 |
| 66 | 8 | 0 | 2.770895  | -2.698598 | 2.384065  |
| 67 | 8 | 0 | 3.045894  | 1.737697  | 3.734138  |

Standard orientation:

| Center Number | Atomic Number | Atomic Type | Coordinates (Angstroms) |           |           |
|---------------|---------------|-------------|-------------------------|-----------|-----------|
|               |               |             | X                       | Y         | Z         |
| 1             | 6             | 0           | -2.704477               | 1.514530  | -3.207273 |
| 2             | 6             | 0           | -1.252976               | 1.533905  | -3.287938 |
| 3             | 6             | 0           | -0.568538               | 0.351884  | -3.509778 |
| 4             | 6             | 0           | -1.285735               | -0.901618 | -3.662994 |
| 5             | 6             | 0           | -2.675317               | -0.930866 | -3.547487 |
| 6             | 6             | 0           | -3.399179               | 0.305578  | -3.308956 |
| 7             | 6             | 0           | -0.736874               | 2.494987  | -2.330599 |
| 8             | 6             | 0           | 0.652698                | 0.102022  | -2.791292 |
| 9             | 6             | 0           | -0.480110               | -1.925012 | -3.037750 |
| 10            | 6             | 0           | -3.309278               | -1.987247 | -2.776838 |
| 11            | 6             | 0           | -4.481061               | 0.015645  | -2.383451 |
| 12            | 6             | 0           | -3.098782               | 2.504801  | -2.228951 |
| 13            | 6             | 0           | -2.524780               | -2.979317 | -2.180272 |
| 14            | 6             | 0           | -1.080007               | -2.952808 | -2.321697 |
| 15            | 6             | 0           | -2.816114               | -3.418204 | -0.830893 |
| 16            | 6             | 0           | -0.477152               | -3.379780 | -1.077156 |
| 17            | 6             | 0           | 0.442902                | 2.250237  | -1.589576 |
| 18            | 6             | 0           | 0.725829                | -1.315792 | -2.523886 |
| 19            | 6             | 0           | -1.553340               | -3.675899 | -0.166314 |
| 20            | 6             | 0           | 1.366167                | -1.771021 | -1.373149 |
| 21            | 6             | 0           | 1.171505                | 1.016783  | -1.864260 |

|    |   |   |           |           |           |    |   |   |          |           |           |
|----|---|---|-----------|-----------|-----------|----|---|---|----------|-----------|-----------|
| 68 | 6 | 0 | 4.078877  | 3.698580  | -0.172205 | 82 | 1 | 0 | 3.704842 | 3.990931  | 0.803099  |
| 69 | 6 | 0 | 4.963025  | 4.503204  | -0.884685 | 83 | 1 | 0 | 5.287047 | 5.457479  | -0.478720 |
| 70 | 6 | 0 | 5.427536  | 4.060327  | -2.124706 | 84 | 1 | 0 | 6.116393 | 4.655831  | -2.715933 |
| 71 | 6 | 0 | 4.990209  | 2.820646  | -2.587758 | 85 | 1 | 0 | 5.336039 | 2.431118  | -3.543375 |
| 72 | 7 | 0 | 4.138813  | 2.038370  | -1.910690 | 86 | 1 | 0 | 4.613942 | -0.597041 | -1.751579 |
| 73 | 6 | 0 | 4.947968  | -1.570289 | -1.401095 | 87 | 1 | 0 | 6.505071 | -1.712819 | -2.873051 |
| 74 | 6 | 0 | 6.019490  | -2.199508 | -2.031348 | 88 | 1 | 0 | 7.302577 | -3.935573 | -2.078761 |
| 75 | 6 | 0 | 6.468845  | -3.444201 | -1.584565 | 89 | 1 | 0 | 6.189908 | -5.011300 | -0.130359 |
| 76 | 6 | 0 | 5.844226  | -4.047314 | -0.493821 | 90 | 1 | 0 | 4.316535 | -3.898189 | 1.004352  |
| 77 | 6 | 0 | 4.772419  | -3.419369 | 0.145832  | 91 | 8 | 0 | 1.078212 | -0.307685 | 1.850585  |
| 78 | 8 | 0 | 0.819378  | 0.464795  | 5.144463  | 92 | 1 | 0 | 1.194933 | -0.785817 | 2.687698  |
| 79 | 6 | 0 | -0.405346 | -2.255138 | 3.009482  | 93 | 1 | 0 | 0.122823 | -0.257566 | 1.707874  |
| 80 | 8 | 0 | 0.316888  | -2.054588 | 3.958761  |    |   |   |          |           |           |
| 81 | 1 | 0 | 4.417891  | -0.659649 | 2.004810  |    |   |   |          |           |           |

-----  
The total electronic energy was calculated to be -3312.6124243 Hartree.

**Table S37.** Optimized structure of INT5f (B3LYP-D3/6-31G(d))

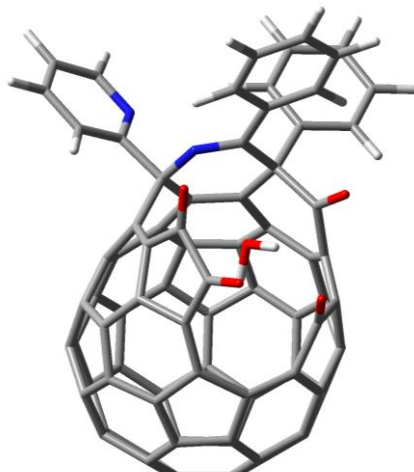

Standard orientation:

| Center Number | Atomic Number | Atomic Type | Coordinates (Angstroms) |           |           |
|---------------|---------------|-------------|-------------------------|-----------|-----------|
|               |               |             | X                       | Y         | Z         |
| 1             | 6             | 0           | -3.755687               | 1.239232  | -2.877015 |
| 2             | 6             | 0           | -2.343401               | 1.320600  | -3.211687 |
| 3             | 6             | 0           | -1.641978               | 0.159855  | -3.490648 |
| 4             | 6             | 0           | -2.303480               | -1.132474 | -3.448976 |
| 5             | 6             | 0           | -3.649012               | -1.218581 | -3.090846 |
| 6             | 6             | 0           | -4.388847               | -0.004530 | -2.793601 |
| 7             | 6             | 0           | -1.724663               | 2.358004  | -2.408108 |
| 8             | 6             | 0           | -0.303303               | 0.010432  | -2.987791 |
| 9             | 6             | 0           | -1.346334               | -2.078003 | -2.921709 |
| 10            | 6             | 0           | -4.082590               | -2.254149 | -2.167620 |
| 11            | 6             | 0           | -5.278552               | -0.287469 | -1.680204 |
| 12            | 6             | 0           | -4.030249               | 2.267293  | -1.896519 |
| 13            | 6             | 0           | -3.153338               | -3.170290 | -1.665350 |
| 14            | 6             | 0           | -1.758049               | -3.086087 | -2.059031 |
| 15            | 6             | 0           | -3.184183               | -3.537142 | -0.263930 |
| 16            | 6             | 0           | -0.929373               | -3.402331 | -0.916907 |
| 17            | 6             | 0           | -0.424227               | 2.207456  | -1.870687 |
| 18            | 6             | 0           | -0.104796               | -1.384072 | -2.661355 |
| 19            | 6             | 0           | -1.813390               | -3.687973 | 0.183623  |
| 20            | 6             | 0           | 0.743701                | -1.733838 | -1.615015 |
| 21            | 6             | 0           | 0.312328                | 0.997259  | -2.208822 |
| 22            | 6             | 0           | -5.077223               | -1.671929 | -1.283610 |
| 23            | 6             | 0           | -5.519472               | 0.691448  | -0.714162 |
| 24            | 6             | 0           | -0.101116               | 2.835831  | -0.578721 |
| 25            | 6             | 0           | -4.906200               | 2.003740  | -0.834570 |
| 26            | 6             | 0           | -2.795497               | 2.987503  | -1.654498 |
| 27            | 6             | 0           | -5.522514               | 0.331867  | 0.693171  |
| 28            | 6             | 0           | -4.575872               | 2.470432  | 0.495042  |
| 29            | 6             | 0           | -2.521153               | 3.498782  | -0.399401 |
| 30            | 6             | 0           | 0.310796                | -2.776372 | -0.684446 |
| 31            | 6             | 0           | -5.093076               | -2.017099 | 0.073854  |
| 32            | 6             | 0           | 1.428282                | 0.596682  | -1.389367 |
| 33            | 6             | 0           | -4.907546               | 1.412415  | 1.436924  |
| 34            | 6             | 0           | -3.434324               | 3.233750  | 0.705018  |
| 35            | 6             | 0           | -1.168585               | 3.461322  | 0.100461  |
| 36            | 6             | 0           | -1.266441               | 3.290563  | 1.520953  |
| 37            | 6             | 0           | 1.085896                | 2.433689  | 0.186581  |
| 38            | 6             | 0           | 1.671760                | -0.729060 | -1.139066 |
| 39            | 6             | 0           | 2.217745                | -2.153916 | 0.846609  |
| 40            | 6             | 0           | -2.616585               | 3.009410  | 1.875149  |
| 41            | 6             | 0           | -2.850072               | 1.908620  | 2.709545  |
| 42            | 6             | 0           | -1.780450               | 1.102854  | 3.286998  |
| 43            | 6             | 0           | -4.027378               | 1.118488  | 2.482287  |
| 44            | 6             | 0           | -4.124151               | -2.961198 | 0.588311  |
| 45            | 6             | 0           | 1.900373                | 2.041636  | 2.723978  |
| 46            | 6             | 0           | -5.292504               | -0.984814 | 1.080901  |
| 47            | 6             | 0           | -4.399368               | -1.267389 | 2.192301  |
| 48            | 6             | 0           | 1.040791                | 2.502391  | 1.576829  |
| 49            | 6             | 0           | 0.800561                | -2.653831 | 0.673186  |
| 50            | 6             | 0           | -0.109094               | -2.816240 | 1.727478  |
| 51            | 6             | 0           | -0.251387               | 2.672182  | 2.201644  |
| 52            | 6             | 0           | -0.489502               | 1.657806  | 3.213661  |
| 53            | 6             | 0           | -3.719134               | -0.238002 | 2.851324  |
| 54            | 6             | 0           | -2.321480               | -0.336010 | 3.300204  |
| 55            | 6             | 0           | 0.883882                | 1.394845  | 3.761586  |
| 56            | 6             | 0           | -3.708650               | -2.488598 | 1.901511  |
| 57            | 6             | 0           | -1.431425               | -3.263145 | 1.449989  |
| 58            | 6             | 0           | -0.234902               | -2.015598 | 3.036072  |
| 59            | 6             | 0           | -2.392307               | -2.596218 | 2.313234  |
| 60            | 6             | 0           | -1.703015               | -1.581713 | 3.081613  |
| 61            | 6             | 0           | 2.179625                | 1.680311  | -0.628917 |
| 62            | 6             | 0           | 2.816749                | -1.226609 | -0.279197 |
| 63            | 6             | 0           | 3.618467                | -0.028977 | 0.321388  |
| 64            | 7             | 0           | 3.274321                | 1.197361  | 0.180943  |
| 65            | 6             | 0           | 3.703015                | -2.042099 | -1.253396 |
| 66            | 6             | 0           | 2.870475                | 2.651987  | -1.616847 |
| 67            | 8             | 0           | 2.873559                | -2.565074 | 1.782021  |
| 68            | 8             | 0           | 3.067106                | 2.219480  | 2.959959  |
| 69            | 6             | 0           | 3.179665                | 3.960739  | -1.234753 |
| 70            | 6             | 0           | 3.867557                | 4.770654  | -2.134076 |
| 71            | 6             | 0           | 4.225565                | 4.245658  | -3.376943 |
| 72            | 6             | 0           | 3.884016                | 2.923048  | -3.655566 |
| 73            | 7             | 0           | 3.221988                | 2.135519  | -2.798018 |

|    |   |   |          |           |           |     |   |   |          |           |           |
|----|---|---|----------|-----------|-----------|-----|---|---|----------|-----------|-----------|
| 74 | 6 | 0 | 4.368225 | -1.343775 | -2.270756 | 90  | 1 | 0 | 4.152119 | 2.469097  | -4.607810 |
| 75 | 6 | 0 | 5.140666 | -2.028571 | -3.206641 | 91  | 1 | 0 | 4.261668 | -0.264509 | -2.341288 |
| 76 | 6 | 0 | 5.249149 | -3.419921 | -3.149639 | 92  | 1 | 0 | 5.655210 | -1.471761 | -3.985144 |
| 77 | 6 | 0 | 4.575114 | -4.120464 | -2.149526 | 93  | 1 | 0 | 5.851347 | -3.953223 | -3.880021 |
| 78 | 6 | 0 | 3.803908 | -3.436983 | -1.207129 | 94  | 1 | 0 | 4.648990 | -5.203243 | -2.095086 |
| 79 | 8 | 0 | 0.621206 | -1.732131 | 3.845023  | 95  | 1 | 0 | 3.305447 | -3.999906 | -0.424658 |
| 80 | 8 | 0 | 1.198880 | 0.901010  | 4.814954  | 96  | 1 | 0 | 7.176764 | -2.613368 | 2.005160  |
| 81 | 6 | 0 | 6.712580 | -1.634438 | 1.921452  | 97  | 1 | 0 | 5.079100 | -2.392943 | 0.787104  |
| 82 | 6 | 0 | 5.513651 | -1.507495 | 1.221399  | 98  | 1 | 0 | 5.023375 | 1.823652  | 1.596112  |
| 83 | 6 | 0 | 4.883909 | -0.258806 | 1.089973  | 99  | 1 | 0 | 7.141047 | 1.604472  | 2.851181  |
| 84 | 6 | 0 | 5.503663 | 0.859180  | 1.684763  | 100 | 1 | 0 | 8.240603 | -0.624212 | 3.061165  |
| 85 | 6 | 0 | 6.693557 | 0.727693  | 2.390776  | 101 | 8 | 0 | 1.324562 | -0.138128 | 1.760940  |
| 86 | 6 | 0 | 7.308490 | -0.521084 | 2.511382  | 102 | 1 | 0 | 1.542515 | -0.637723 | 2.569453  |
| 87 | 1 | 0 | 2.893659 | 4.322812  | -0.252979 | 103 | 1 | 0 | 0.358924 | -0.135467 | 1.707425  |
| 88 | 1 | 0 | 4.122334 | 5.793108  | -1.869045 |     |   |   |          |           |           |
| 89 | 1 | 0 | 4.760522 | 4.841643  | -4.109939 |     |   |   |          |           |           |

The total electronic energy was calculated to be -3543.6798064 Hartree.

**Table S38.** Optimized structure of **TS2a** (B3LYP-D3/6-31G(d))

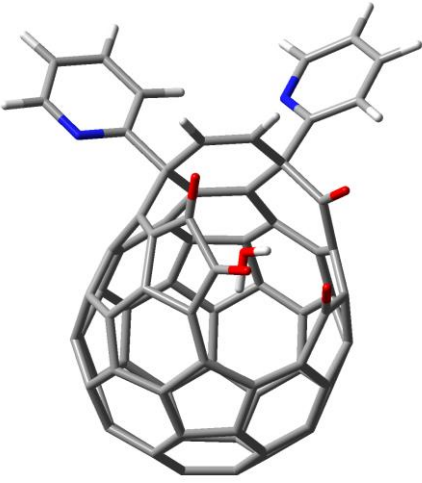

|    |   |   |           |           |           |  |  |  |  |  |  |
|----|---|---|-----------|-----------|-----------|--|--|--|--|--|--|
| 23 | 6 | 0 | -4.823915 | 0.956220  | -1.385607 |  |  |  |  |  |  |
| 24 | 6 | 0 | 0.532010  | 2.849910  | -0.018423 |  |  |  |  |  |  |
| 25 | 6 | 0 | -4.168221 | 2.243979  | -1.228210 |  |  |  |  |  |  |
| 26 | 6 | 0 | -1.920286 | 3.221593  | -1.527279 |  |  |  |  |  |  |
| 27 | 6 | 0 | -5.090701 | 0.431281  | -0.057246 |  |  |  |  |  |  |
| 28 | 6 | 0 | -4.075613 | 2.533536  | 0.187126  |  |  |  |  |  |  |
| 29 | 6 | 0 | -1.870622 | 3.570917  | -0.190386 |  |  |  |  |  |  |
| 30 | 6 | 0 | 0.822080  | -2.776923 | -0.745105 |  |  |  |  |  |  |
| 31 | 6 | 0 | -4.612138 | -1.844685 | -0.880379 |  |  |  |  |  |  |
| 32 | 6 | 0 | 2.134273  | 0.624731  | -0.804447 |  |  |  |  |  |  |
| 33 | 6 | 0 | -4.596234 | 1.386318  | 0.913549  |  |  |  |  |  |  |
| 34 | 6 | 0 | -2.974520 | 3.215144  | 0.691047  |  |  |  |  |  |  |
| 35 | 6 | 0 | -0.633150 | 3.423821  | 0.534092  |  |  |  |  |  |  |
| 36 | 6 | 0 | -0.988718 | 3.087317  | 1.882335  |  |  |  |  |  |  |
| 37 | 6 | 0 | 1.560623  | 2.331848  | 0.880773  |  |  |  |  |  |  |
| 38 | 6 | 0 | 2.296126  | -0.741527 | -0.695698 |  |  |  |  |  |  |
| 39 | 6 | 0 | 2.359856  | -2.390055 | 1.209663  |  |  |  |  |  |  |
| 40 | 6 | 0 | -2.387088 | 2.818475  | 1.950526  |  |  |  |  |  |  |
| 41 | 6 | 0 | -2.794230 | 1.636316  | 2.583038  |  |  |  |  |  |  |
| 42 | 6 | 0 | -1.864028 | 0.720502  | 3.232338  |  |  |  |  |  |  |
| 43 | 6 | 0 | -3.925941 | 0.930357  | 2.052584  |  |  |  |  |  |  |
| 44 | 6 | 0 | -3.778031 | -2.889287 | -0.325377 |  |  |  |  |  |  |
| 45 | 6 | 0 | 1.874790  | 1.512028  | 3.418434  |  |  |  |  |  |  |
| 46 | 6 | 0 | -4.964890 | -0.930984 | 0.196460  |  |  |  |  |  |  |
| 47 | 6 | 0 | -4.292728 | -1.384566 | 1.402794  |  |  |  |  |  |  |
| 48 | 6 | 0 | 1.257050  | 2.204235  | 2.238149  |  |  |  |  |  |  |
| 49 | 6 | 0 | 1.050730  | -2.885183 | 0.681418  |  |  |  |  |  |  |
| 50 | 6 | 0 | -0.042430 | -3.131685 | 1.526878  |  |  |  |  |  |  |
| 51 | 6 | 0 | -0.123800 | 2.347576  | 2.646627  |  |  |  |  |  |  |
| 52 | 6 | 0 | -0.572102 | 1.227219  | 3.457937  |  |  |  |  |  |  |
| 53 | 6 | 0 | -3.717295 | -0.473383 | 2.294430  |  |  |  |  |  |  |
| 54 | 6 | 0 | -2.423618 | -0.688346 | 2.962945  |  |  |  |  |  |  |
| 55 | 6 | 0 | 0.669590  | 0.808401  | 4.175873  |  |  |  |  |  |  |
| 56 | 6 | 0 | -3.594409 | -2.594893 | 1.089619  |  |  |  |  |  |  |
| 57 | 6 | 0 | -1.303436 | -3.449911 | 0.961891  |  |  |  |  |  |  |
| 58 | 6 | 0 | -0.360830 | -2.433235 | 2.862656  |  |  |  |  |  |  |
| 59 | 6 | 0 | -2.379626 | -2.819396 | 1.712151  |  |  |  |  |  |  |
| 60 | 6 | 0 | -1.806028 | -1.929974 | 2.700387  |  |  |  |  |  |  |
| 61 | 6 | 0 | 2.756634  | 1.623009  | 0.182199  |  |  |  |  |  |  |
| 62 | 6 | 0 | 3.188935  | -1.396900 | 0.329506  |  |  |  |  |  |  |
| 63 | 6 | 0 | 3.869454  | -0.387371 | 1.226148  |  |  |  |  |  |  |
| 64 | 6 | 0 | 3.689592  | 0.929242  | 1.145319  |  |  |  |  |  |  |
| 65 | 6 | 0 | 4.314174  | -2.171446 | -0.407193 |  |  |  |  |  |  |
| 66 | 6 | 0 | 3.612093  | 2.638567  | -0.605572 |  |  |  |  |  |  |
| 67 | 8 | 0 | 2.782473  | -2.762935 | 2.288483  |  |  |  |  |  |  |
| 68 | 8 | 0 | 3.001557  | 1.508553  | 3.851375  |  |  |  |  |  |  |
| 69 | 6 | 0 | 4.539070  | 2.168558  | -1.547466 |  |  |  |  |  |  |

Standard orientation:

| Center Number | Atomic Number | Atomic Type | Coordinates (Angstroms) |           |           |
|---------------|---------------|-------------|-------------------------|-----------|-----------|
|               |               |             | X                       | Y         | Z         |
| 1             | 6             | 0           | -2.679954               | 1.674156  | -3.109342 |
| 2             | 6             | 0           | -1.228714               | 1.728357  | -3.169697 |
| 3             | 6             | 0           | -0.516922               | 0.577835  | -3.458908 |
| 4             | 6             | 0           | -1.204987               | -0.676888 | -3.703389 |
| 5             | 6             | 0           | -2.595127               | -0.742118 | -3.608561 |
| 6             | 6             | 0           | -3.347696               | 0.460878  | -3.299410 |
| 7             | 6             | 0           | -0.742849               | 2.636529  | -2.147071 |
| 8             | 6             | 0           | 0.699908                | 0.306396  | -2.740415 |
| 9             | 6             | 0           | -0.384945               | -1.721818 | -3.134252 |
| 10            | 6             | 0           | -3.215723               | -1.859122 | -2.916499 |
| 11            | 6             | 0           | -4.433709               | 0.089114  | -2.408162 |
| 12            | 6             | 0           | -3.105611               | 2.591046  | -2.074107 |
| 13            | 6             | 0           | -2.417494               | -2.872267 | -2.376775 |
| 14            | 6             | 0           | -0.971937               | -2.806983 | -2.497116 |
| 15            | 6             | 0           | -2.714294               | -3.405160 | -1.063017 |
| 16            | 6             | 0           | -0.374149               | -3.304221 | -1.276746 |
| 17            | 6             | 0           | 0.434323                | 2.372223  | -1.409339 |
| 18            | 6             | 0           | 0.800593                | -1.122340 | -2.564287 |
| 19            | 6             | 0           | -1.454519               | -3.683081 | -0.401499 |
| 20            | 6             | 0           | 1.440791                | -1.637818 | -1.438367 |
| 21            | 6             | 0           | 1.191180                | 1.168448  | -1.749687 |
| 22            | 6             | 0           | -4.341038               | -1.340706 | -2.158747 |

|    |   |   |          |           |           |    |   |   |           |           |           |
|----|---|---|----------|-----------|-----------|----|---|---|-----------|-----------|-----------|
| 70 | 6 | 0 | 5.322090 | 3.098306  | -2.223517 | 84 | 1 | 0 | 6.047460  | 2.770731  | -2.963542 |
| 71 | 6 | 0 | 5.160593 | 4.456024  | -1.935930 | 85 | 1 | 0 | 5.749828  | 5.215215  | -2.441315 |
| 72 | 6 | 0 | 4.219744 | 4.817327  | -0.974059 | 86 | 1 | 0 | 4.065491  | 5.863116  | -0.714251 |
| 73 | 7 | 0 | 3.456128 | 3.933133  | -0.315615 | 87 | 1 | 0 | 4.637576  | -3.676410 | 1.112916  |
| 74 | 6 | 0 | 4.944091 | -3.291341 | 0.147760  | 88 | 1 | 0 | 6.484453  | -4.767411 | -0.156001 |
| 75 | 6 | 0 | 5.981969 | -3.894033 | -0.562601 | 89 | 1 | 0 | 7.162689  | -3.801039 | -2.379581 |
| 76 | 6 | 0 | 6.362026 | -3.361461 | -1.792855 | 90 | 1 | 0 | 5.952379  | -1.773580 | -3.203056 |
| 77 | 6 | 0 | 5.684266 | -2.231961 | -2.252727 | 91 | 8 | 0 | 0.907664  | -0.358763 | 1.642534  |
| 78 | 7 | 0 | 4.687097 | -1.644627 | -1.583493 | 92 | 1 | 0 | -0.054982 | -0.341770 | 1.549068  |
| 79 | 8 | 0 | 0.361240 | -2.238370 | 3.812535  | 93 | 1 | 0 | 1.077848  | -0.796599 | 2.489864  |
| 80 | 8 | 0 | 0.789914 | 0.167052  | 5.189931  |    |   |   |           |           |           |
| 81 | 1 | 0 | 4.547134 | -0.801847 | 1.965457  |    |   |   |           |           |           |
| 82 | 1 | 0 | 4.226809 | 1.584307  | 1.821230  |    |   |   |           |           |           |
| 83 | 1 | 0 | 4.631792 | 1.101423  | -1.733006 |    |   |   |           |           |           |

-----  
An imaginary frequency was found at  $-51.89\text{ cm}^{-1}$ .  
The total electronic energy was calculated to be  $-3312.6148006$  Hartree.

**Table S39.** Optimized structure of **TS2b** (B3LYP-D3/6-31G(d))

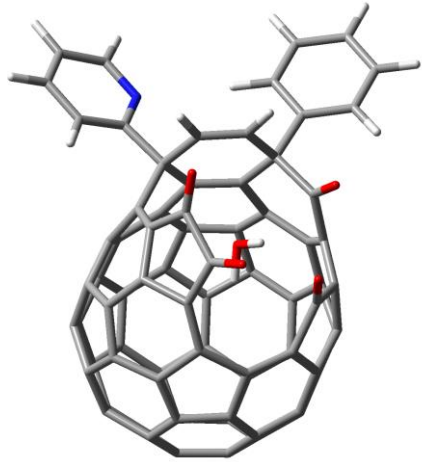

|    |   |   |           |           |           |    |   |   |           |           |           |
|----|---|---|-----------|-----------|-----------|----|---|---|-----------|-----------|-----------|
| 27 | 6 | 0 | -5.089074 | 0.465188  | -0.128257 | 27 | 6 | 0 | -5.089074 | 0.465188  | -0.128257 |
| 28 | 6 | 0 | -4.059521 | 2.570698  | -0.008929 | 28 | 6 | 0 | -4.059521 | 2.570698  | -0.008929 |
| 29 | 6 | 0 | -1.843881 | 3.566323  | -0.430983 | 29 | 6 | 0 | -1.843881 | 3.566323  | -0.430983 |
| 30 | 6 | 0 | 0.806198  | -2.817056 | -0.552811 | 30 | 6 | 0 | 0.806198  | -2.817056 | -0.552811 |
| 31 | 6 | 0 | -4.617797 | -1.861561 | -0.800198 | 31 | 6 | 0 | -4.617797 | -1.861561 | -0.800198 |
| 32 | 6 | 0 | 2.155578  | 0.565540  | -0.827654 | 32 | 6 | 0 | 2.155578  | 0.565540  | -0.827654 |
| 33 | 6 | 0 | -4.596448 | 1.476554  | 0.784643  | 33 | 6 | 0 | -4.596448 | 1.476554  | 0.784643  |
| 34 | 6 | 0 | -2.958430 | 3.275718  | 0.460930  | 34 | 6 | 0 | -2.958430 | 3.275718  | 0.460930  |
| 35 | 6 | 0 | -0.614669 | 3.454233  | 0.313054  | 35 | 6 | 0 | -0.614669 | 3.454233  | 0.313054  |
| 36 | 6 | 0 | -0.984967 | 3.207646  | 1.676777  | 36 | 6 | 0 | -0.984967 | 3.207646  | 1.676777  |
| 37 | 6 | 0 | 1.563754  | 2.364253  | 0.750055  | 37 | 6 | 0 | 1.563754  | 2.364253  | 0.750055  |
| 38 | 6 | 0 | 2.292870  | -0.792685 | -0.618793 | 38 | 6 | 0 | 2.292870  | -0.792685 | -0.618793 |
| 39 | 6 | 0 | 2.331797  | -2.310277 | 1.386717  | 39 | 6 | 0 | 2.331797  | -2.310277 | 1.386717  |
| 40 | 6 | 0 | -2.386528 | 2.956567  | 1.748938  | 40 | 6 | 0 | -2.386528 | 2.956567  | 1.748938  |
| 41 | 6 | 0 | -2.808151 | 1.820251  | 2.452155  | 41 | 6 | 0 | -2.808151 | 1.820251  | 2.452155  |
| 42 | 6 | 0 | -1.891146 | 0.940658  | 3.168206  | 42 | 6 | 0 | -1.891146 | 0.940658  | 3.168206  |
| 43 | 6 | 0 | -3.941009 | 1.089926  | 1.957934  | 43 | 6 | 0 | -3.941009 | 1.089926  | 1.957934  |
| 44 | 6 | 0 | -3.797403 | -2.874432 | -0.171477 | 44 | 6 | 0 | -3.797403 | -2.874432 | -0.171477 |
| 45 | 6 | 0 | 1.850779  | 1.714058  | 3.340776  | 45 | 6 | 0 | 1.850779  | 1.714058  | 3.340776  |
| 46 | 6 | 0 | -4.973938 | -0.878609 | 0.212613  | 46 | 6 | 0 | -4.973938 | -0.878609 | 0.212613  |
| 47 | 6 | 0 | -4.317034 | -1.259144 | 1.452130  | 47 | 6 | 0 | -4.317034 | -1.259144 | 1.452130  |
| 48 | 6 | 0 | 1.247331  | 2.330222  | 2.110727  | 48 | 6 | 0 | 1.247331  | 2.330222  | 2.110727  |
| 49 | 6 | 0 | 1.023622  | -2.835713 | 0.879282  | 49 | 6 | 0 | 1.023622  | -2.835713 | 0.879282  |
| 50 | 6 | 0 | -0.079163 | -3.021205 | 1.728756  | 50 | 6 | 0 | -0.079163 | -3.021205 | 1.728756  |
| 51 | 6 | 0 | -0.134010 | 2.512566  | 2.496773  | 51 | 6 | 0 | -0.134010 | 2.512566  | 2.496773  |
| 52 | 6 | 0 | -0.597943 | 1.450018  | 3.375211  | 52 | 6 | 0 | -0.597943 | 1.450018  | 3.375211  |
| 53 | 6 | 0 | -3.744571 | -0.297060 | 2.290427  | 53 | 6 | 0 | -3.744571 | -0.297060 | 2.290427  |
| 54 | 6 | 0 | -2.459102 | -0.478213 | 2.983911  | 54 | 6 | 0 | -2.459102 | -0.478213 | 2.983911  |
| 55 | 6 | 0 | 0.633865  | 1.067114  | 4.129327  | 55 | 6 | 0 | 0.633865  | 1.067114  | 4.129327  |
| 56 | 6 | 0 | -3.624546 | -2.491442 | 1.223371  | 56 | 6 | 0 | -3.624546 | -2.491442 | 1.223371  |
| 57 | 6 | 0 | -1.337660 | -3.366631 | 1.172867  | 57 | 6 | 0 | -1.337660 | -3.366631 | 1.172867  |
| 58 | 6 | 0 | -0.405278 | -2.236772 | 3.013876  | 58 | 6 | 0 | -0.405278 | -2.236772 | 3.013876  |
| 59 | 6 | 0 | -2.416924 | -2.683874 | 1.870586  | 59 | 6 | 0 | -2.416924 | -2.683874 | 1.870586  |
| 60 | 6 | 0 | -1.847251 | -1.737380 | 2.806386  | 60 | 6 | 0 | -1.847251 | -1.737380 | 2.806386  |
| 61 | 6 | 0 | 2.769751  | 1.616407  | 0.107954  | 61 | 6 | 0 | 2.769751  | 1.616407  | 0.107954  |
| 62 | 6 | 0 | 3.178604  | -1.393616 | 0.447728  | 62 | 6 | 0 | 3.178604  | -1.393616 | 0.447728  |
| 63 | 6 | 0 | 3.857931  | -0.336099 | 1.282924  | 63 | 6 | 0 | 3.857931  | -0.336099 | 1.282924  |
| 64 | 6 | 0 | 3.689962  | 0.974538  | 1.120977  | 64 | 6 | 0 | 3.689962  | 0.974538  | 1.120977  |
| 65 | 6 | 0 | 4.279670  | -2.233146 | -0.254329 | 65 | 6 | 0 | 4.279670  | -2.233146 | -0.254329 |
| 66 | 6 | 0 | 3.646822  | 2.585942  | -0.714453 | 66 | 6 | 0 | 3.646822  | 2.585942  | -0.714453 |
| 67 | 8 | 0 | 2.733795  | -2.604030 | 2.496563  | 67 | 8 | 0 | 2.733795  | -2.604030 | 2.496563  |
| 68 | 8 | 0 | 2.972225  | 1.747579  | 3.785212  | 68 | 8 | 0 | 2.972225  | 1.747579  | 3.785212  |
| 69 | 6 | 0 | 3.782471  | 3.933286  | -0.365325 | 69 | 6 | 0 | 3.782471  | 3.933286  | -0.365325 |
| 70 | 6 | 0 | 4.645073  | 4.736167  | -1.110260 | 70 | 6 | 0 | 4.645073  | 4.736167  | -1.110260 |
| 71 | 6 | 0 | 5.342118  | 4.169027  | -2.175693 | 71 | 6 | 0 | 5.342118  | 4.169027  | -2.175693 |
| 72 | 6 | 0 | 5.146224  | 2.812485  | -2.439599 | 72 | 6 | 0 | 5.146224  | 2.812485  | -2.439599 |
| 73 | 7 | 0 | 4.324115  | 2.032731  | -1.730393 | 73 | 7 | 0 | 4.324115  | 2.032731  | -1.730393 |
| 74 | 6 | 0 | 5.006778  | -1.619817 | -1.286950 | 74 | 6 | 0 | 5.006778  | -1.619817 | -1.286950 |
| 75 | 6 | 0 | 6.012852  | -2.318415 | -1.950100 | 75 | 6 | 0 | 6.012852  | -2.318415 | -1.950100 |

Standard orientation:

| Center Number | Atomic Number | Atomic Type | Coordinates (Angstroms) |           |           |
|---------------|---------------|-------------|-------------------------|-----------|-----------|
|               |               |             | X                       | Y         | Z         |
| 1             | 6             | 0           | -2.640577               | 1.494582  | -3.232149 |
| 2             | 6             | 0           | -1.188066               | 1.535375  | -3.283489 |
| 3             | 6             | 0           | -0.482418               | 0.363549  | -3.489604 |
| 4             | 6             | 0           | -1.177889               | -0.899877 | -3.659524 |
| 5             | 6             | 0           | -2.569029               | -0.949634 | -3.574036 |
| 6             | 6             | 0           | -3.315587               | 0.276031  | -3.349314 |
| 7             | 6             | 0           | -0.704277               | 2.502305  | -2.315469 |
| 8             | 6             | 0           | 0.727558                | 0.130698  | -2.746540 |
| 9             | 6             | 0           | -0.370609               | -1.911375 | -3.017218 |
| 10            | 6             | 0           | -3.203933               | -2.016167 | -2.818190 |
| 11            | 6             | 0           | -4.411534               | -0.030813 | -2.446033 |
| 12            | 6             | 0           | -3.068709               | 2.477240  | -2.260557 |
| 13            | 6             | 0           | -2.417651               | -2.997500 | -2.206521 |
| 14            | 6             | 0           | -0.970794               | -2.949488 | -2.317003 |
| 15            | 6             | 0           | -2.730343               | -3.443246 | -0.864095 |
| 16            | 6             | 0           | -0.387948               | -3.369922 | -1.061259 |
| 17            | 6             | 0           | 0.466258                | 2.276631  | -1.553614 |
| 18            | 6             | 0           | 0.814206                | -1.284265 | -2.476385 |
| 19            | 6             | 0           | -1.478384               | -3.686197 | -0.173906 |
| 20            | 6             | 0           | 1.437830                | -1.728405 | -1.311788 |
| 21            | 6             | 0           | 1.221621                | 1.052085  | -1.811741 |
| 22            | 6             | 0           | -4.331572               | -1.442535 | -2.105250 |
| 23            | 6             | 0           | -4.806451               | 0.902456  | -1.485264 |
| 24            | 6             | 0           | 0.550909                | 2.836751  | -0.192131 |
| 25            | 6             | 0           | -4.140821               | 2.191661  | -1.403695 |
| 26            | 6             | 0           | -1.883099               | 3.131584  | -1.742855 |

|    |   |   |          |           |           |    |   |   |           |           |           |
|----|---|---|----------|-----------|-----------|----|---|---|-----------|-----------|-----------|
| 76 | 6 | 0 | 6.310437 | -3.636445 | -1.592963 | 87 | 1 | 0 | 4.785493  | -0.591326 | -1.562137 |
| 77 | 6 | 0 | 5.599433 | -4.244366 | -0.559930 | 88 | 1 | 0 | 6.567492  | -1.830652 | -2.747569 |
| 78 | 6 | 0 | 4.590629 | -3.546558 | 0.110895  | 89 | 1 | 0 | 7.094072  | -4.181291 | -2.112599 |
| 79 | 8 | 0 | 0.308826 | -1.980465 | 3.954787  | 90 | 1 | 0 | 5.827469  | -5.265493 | -0.266093 |
| 80 | 8 | 0 | 0.740626 | 0.496357  | 5.185668  | 91 | 1 | 0 | 4.065534  | -4.032874 | 0.925424  |
| 81 | 1 | 0 | 4.529510 | -0.710413 | 2.048298  | 92 | 8 | 0 | 0.861586  | -0.239629 | 1.655041  |
| 82 | 1 | 0 | 4.232799 | 1.664158  | 1.757226  | 93 | 1 | 0 | -0.099004 | -0.280748 | 1.549745  |
| 83 | 1 | 0 | 3.222127 | 4.341074  | 0.469566  | 94 | 1 | 0 | 1.045054  | -0.647354 | 2.514546  |
| 84 | 1 | 0 | 4.767926 | 5.786731  | -0.861543 |    |   |   |           |           |           |
| 85 | 1 | 0 | 6.021558 | 4.756145  | -2.785703 |    |   |   |           |           |           |
| 86 | 1 | 0 | 5.673937 | 2.326090  | -3.258042 |    |   |   |           |           |           |

An imaginary frequency was found at  $-56.60\text{ cm}^{-1}$ .

The total electronic energy was calculated to be  $-3296.5758637$  Hartree.

**Table S40.** Optimized structure of TS2c (B3LYP-D3/6-31G(d))

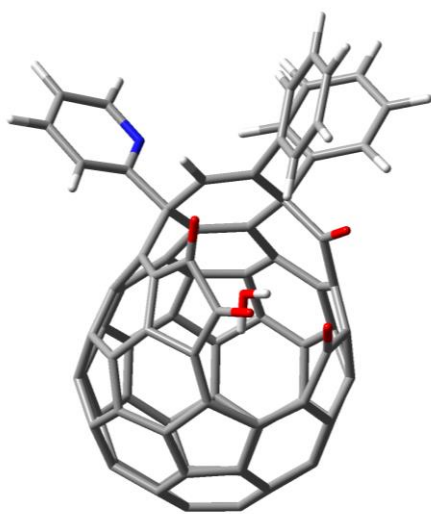

Standard orientation:

| Center Number | Atomic Number | Atomic Type | Coordinates (Angstroms) |           |           |
|---------------|---------------|-------------|-------------------------|-----------|-----------|
|               |               |             | X                       | Y         | Z         |
| 1             | 6             | 0           | -3.807896               | 2.183996  | -2.170089 |
| 2             | 6             | 0           | -2.400922               | 2.444020  | -2.427426 |
| 3             | 6             | 0           | -1.657077               | 1.517407  | -3.136099 |
| 4             | 6             | 0           | -2.269549               | 0.296462  | -3.627614 |
| 5             | 6             | 0           | -3.610261               | 0.026037  | -3.352708 |
| 6             | 6             | 0           | -4.394630               | 0.990581  | -2.601392 |
| 7             | 6             | 0           | -1.817656               | 3.095846  | -1.269811 |
| 8             | 6             | 0           | -0.312036               | 1.225071  | -2.717331 |
| 9             | 6             | 0           | -1.275455               | -0.745928 | -3.513357 |
| 10            | 6             | 0           | -4.001046               | -1.308056 | -2.930108 |
| 11            | 6             | 0           | -5.267573               | 0.251354  | -1.704776 |
| 12            | 6             | 0           | -4.116427               | 2.720307  | -0.862419 |
| 13            | 6             | 0           | -3.036489               | -2.315258 | -2.830397 |
| 14            | 6             | 0           | -1.646803               | -2.030933 | -3.140176 |
| 15            | 6             | 0           | -3.047342               | -3.218911 | -1.698306 |
| 16            | 6             | 0           | -0.801254               | -2.756330 | -2.218649 |
| 17            | 6             | 0           | -0.508525               | 2.797422  | -0.824623 |
| 18            | 6             | 0           | -0.061079               | -0.172516 | -2.976313 |
| 19            | 6             | 0           | -1.670215               | -3.499100 | -1.340654 |
| 20            | 6             | 0           | 0.809092                | -0.883755 | -2.151373 |
| 21            | 6             | 0           | 0.276137                | 1.842714  | -1.605351 |
| 22            | 6             | 0           | -5.011962               | -1.167643 | -1.896872 |
| 23            | 6             | 0           | -5.539540               | 0.749204  | -0.428942 |
| 24            | 6             | 0           | -0.206873               | 2.887790  | 0.615303  |
| 25            | 6             | 0           | -4.976174               | 2.019850  | -0.005160 |

|    |   |   |           |           |           |
|----|---|---|-----------|-----------|-----------|
| 26 | 6 | 0 | -2.909737 | 3.329074  | -0.338360 |
| 27 | 6 | 0 | -5.518376 | -0.146546 | 0.715202  |
| 28 | 6 | 0 | -4.657156 | 1.924895  | 1.403736  |
| 29 | 6 | 0 | -2.652569 | 3.308036  | 1.020236  |
| 30 | 6 | 0 | 0.420519  | -2.238877 | -1.740309 |
| 31 | 6 | 0 | -5.005899 | -2.030267 | -0.793370 |
| 32 | 6 | 0 | 1.416874  | 1.193373  | -1.008852 |
| 33 | 6 | 0 | -4.939756 | 0.565478  | 1.836556  |
| 34 | 6 | 0 | -3.546310 | 2.584436  | 1.914968  |
| 35 | 6 | 0 | -1.297670 | 3.133104  | 1.478862  |
| 36 | 6 | 0 | -1.375992 | 2.400254  | 2.710212  |
| 37 | 6 | 0 | 1.002779  | 2.279590  | 1.163591  |
| 38 | 6 | 0 | 1.706337  | -0.121085 | -1.309174 |
| 39 | 6 | 0 | 2.244008  | -2.193491 | -0.001397 |
| 40 | 6 | 0 | -2.711252 | 1.941438  | 2.903976  |
| 41 | 6 | 0 | -2.894032 | 0.588468  | 3.220271  |
| 42 | 6 | 0 | -1.787123 | -0.338818 | 3.430506  |
| 43 | 6 | 0 | -4.039001 | -0.089783 | 2.681956  |
| 44 | 6 | 0 | -4.001857 | -3.068086 | -0.694178 |
| 45 | 6 | 0 | 1.839080  | 0.876183  | 3.285679  |
| 46 | 6 | 0 | -5.234263 | -1.497264 | 0.541896  |
| 47 | 6 | 0 | -4.320735 | -2.168639 | 1.451759  |
| 48 | 6 | 0 | 0.960050  | 1.761255  | 2.459006  |
| 49 | 6 | 0 | 0.908185  | -2.693200 | -0.458425 |
| 50 | 6 | 0 | 0.014055  | -3.307477 | 0.432174  |
| 51 | 6 | 0 | -0.329380 | 1.602324  | 3.093113  |
| 52 | 6 | 0 | -0.522834 | 0.252948  | 3.602207  |
| 53 | 6 | 0 | -3.672978 | -1.465925 | 2.472847  |
| 54 | 6 | 0 | -2.267128 | -1.682389 | 2.850210  |
| 55 | 6 | 0 | 0.863432  | -0.174342 | 3.965708  |
| 56 | 6 | 0 | -3.591645 | -3.146625 | 0.701739  |
| 57 | 6 | 0 | -1.296703 | -3.626476 | -0.006413 |
| 58 | 6 | 0 | -0.115088 | -3.036560 | 1.941087  |
| 59 | 6 | 0 | -2.270136 | -3.370910 | 1.044813  |
| 60 | 6 | 0 | -1.605168 | -2.713447 | 2.150444  |
| 61 | 6 | 0 | 2.113190  | 1.949324  | 0.125026  |
| 62 | 6 | 0 | 2.838217  | -0.912338 | -0.679756 |
| 63 | 6 | 0 | 3.628851  | -0.090155 | 0.344261  |
| 64 | 6 | 0 | 3.269921  | 1.153931  | 0.681319  |
| 65 | 6 | 0 | 3.796505  | -1.337640 | -1.824028 |
| 66 | 6 | 0 | 2.742752  | 3.244499  | -0.437672 |
| 67 | 8 | 0 | 2.849666  | -2.804170 | 0.856915  |
| 68 | 8 | 0 | 3.016544  | 0.937273  | 3.546490  |
| 69 | 6 | 0 | 2.874363  | 4.395917  | 0.344868  |
| 70 | 6 | 0 | 3.518576  | 5.506102  | -0.198699 |
| 71 | 6 | 0 | 4.008646  | 5.429620  | -1.501468 |
| 72 | 6 | 0 | 3.834019  | 4.233508  | -2.199121 |
| 73 | 7 | 0 | 3.221121  | 3.161493  | -1.686865 |
| 74 | 6 | 0 | 4.152209  | -0.369119 | -2.776010 |
| 75 | 6 | 0 | 5.051392  | -0.678800 | -3.794187 |
| 76 | 6 | 0 | 5.606923  | -1.958494 | -3.878824 |
| 77 | 6 | 0 | 5.263876  | -2.919113 | -2.929037 |

|    |   |   |          |           |           |     |   |   |           |           |           |
|----|---|---|----------|-----------|-----------|-----|---|---|-----------|-----------|-----------|
| 78 | 6 | 0 | 4.367650 | -2.610900 | -1.902175 | 93  | 1 | 0 | 5.321243  | 0.083159  | -4.520824 |
| 79 | 8 | 0 | 0.747696 | -2.986382 | 2.786899  | 94  | 1 | 0 | 6.306899  | -2.200203 | -4.674129 |
| 80 | 8 | 0 | 1.233690 | -1.048742 | 4.709081  | 95  | 1 | 0 | 5.700298  | -3.913208 | -2.974586 |
| 81 | 6 | 0 | 7.283085 | -1.045884 | 0.774164  | 96  | 1 | 0 | 4.144200  | -3.360427 | -1.151914 |
| 82 | 6 | 0 | 6.094013 | -0.574284 | 0.216581  | 97  | 1 | 0 | 8.206522  | -0.980137 | 0.204316  |
| 83 | 6 | 0 | 4.890097 | -0.650298 | 0.932224  | 98  | 1 | 0 | 6.098174  | -0.143449 | -0.779478 |
| 84 | 6 | 0 | 4.903470 | -1.195029 | 2.223783  | 99  | 1 | 0 | 3.983682  | -1.258333 | 2.791879  |
| 85 | 6 | 0 | 6.093314 | -1.661431 | 2.780848  | 100 | 1 | 0 | 6.084445  | -2.080419 | 3.783414  |
| 86 | 6 | 0 | 7.285852 | -1.592890 | 2.057804  | 101 | 1 | 0 | 8.211589  | -1.959785 | 2.493982  |
| 87 | 1 | 0 | 3.887159 | 1.687583  | 1.395884  | 102 | 8 | 0 | 0.630163  | -0.529135 | 1.151541  |
| 88 | 1 | 0 | 2.479986 | 4.417638  | 1.355487  | 103 | 1 | 0 | 0.970293  | -1.154420 | 1.807289  |
| 89 | 1 | 0 | 3.634321 | 6.414158  | 0.386659  | 104 | 1 | 0 | -0.329872 | -0.647168 | 1.160313  |
| 90 | 1 | 0 | 4.514739 | 6.269630  | -1.967010 |     |   |   |           |           |           |
| 91 | 1 | 0 | 4.204541 | 4.127604  | -3.217169 |     |   |   |           |           |           |
| 92 | 1 | 0 | 3.744482 | 0.635728  | -2.698656 |     |   |   |           |           |           |

-----  
An imaginary frequency was found at  $-79.41\text{ cm}^{-1}$ .  
The total electronic energy was calculated to be  $-3527.6421041$  Hartree.

**Table S41.** Optimized structure of **TS2d** (B3LYP-D3/6-31G(d))

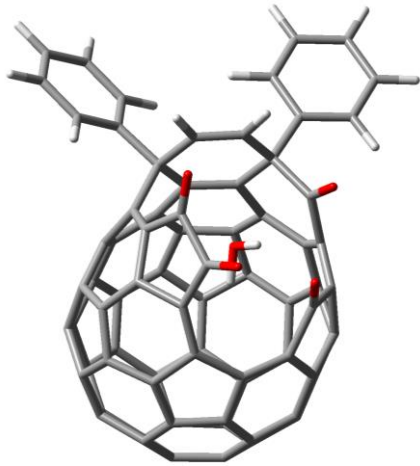

|    |   |   |           |           |           |
|----|---|---|-----------|-----------|-----------|
| 26 | 6 | 0 | -1.829585 | 3.098446  | -1.844577 |
| 27 | 6 | 0 | -5.078011 | 0.545690  | -0.133704 |
| 28 | 6 | 0 | -4.010295 | 2.634984  | -0.087255 |
| 29 | 6 | 0 | -1.777722 | 3.574760  | -0.547657 |
| 30 | 6 | 0 | 0.754578  | -2.852958 | -0.462123 |
| 31 | 6 | 0 | -4.651330 | -1.810014 | -0.729045 |
| 32 | 6 | 0 | 2.168844  | 0.493246  | -0.855569 |
| 33 | 6 | 0 | -4.564851 | 1.577973  | 0.743732  |
| 34 | 6 | 0 | -2.894672 | 3.334343  | 0.356043  |
| 35 | 6 | 0 | -0.548276 | 3.464843  | 0.196676  |
| 36 | 6 | 0 | -0.919249 | 3.271721  | 1.568984  |
| 37 | 6 | 0 | 1.609519  | 2.345619  | 0.663542  |
| 38 | 6 | 0 | 2.283986  | -0.862484 | -0.604961 |
| 39 | 6 | 0 | 2.297440  | -2.316337 | 1.455020  |
| 40 | 6 | 0 | -2.324656 | 3.047971  | 1.652581  |
| 41 | 6 | 0 | -2.765039 | 1.943916  | 2.394410  |
| 42 | 6 | 0 | -1.862095 | 1.072113  | 3.136926  |
| 43 | 6 | 0 | -3.912513 | 1.218494  | 1.927318  |
| 44 | 6 | 0 | -3.847819 | -2.816230 | -0.068738 |
| 45 | 6 | 0 | 1.894664  | 1.780298  | 3.272218  |
| 46 | 6 | 0 | -4.986971 | -0.787906 | 0.251439  |
| 47 | 6 | 0 | -4.333512 | -1.138895 | 1.501385  |
| 48 | 6 | 0 | 1.298227  | 2.366372  | 2.025043  |
| 49 | 6 | 0 | 0.974736  | -2.827374 | 0.969730  |
| 50 | 6 | 0 | -0.128322 | -2.966488 | 1.826714  |
| 51 | 6 | 0 | -0.078518 | 2.587873  | 2.408605  |
| 52 | 6 | 0 | -0.558855 | 1.564084  | 3.323159  |
| 53 | 6 | 0 | -3.740531 | -0.159968 | 2.305185  |
| 54 | 6 | 0 | -2.456678 | -0.341402 | 3.001699  |
| 55 | 6 | 0 | 0.668623  | 1.184506  | 4.086610  |
| 56 | 6 | 0 | -3.664359 | -2.390729 | 1.312408  |
| 57 | 6 | 0 | -1.394123 | -3.307933 | 1.285542  |
| 58 | 6 | 0 | -0.436408 | -2.135086 | 3.086655  |
| 59 | 6 | 0 | -2.458822 | -2.583586 | 1.963239  |
| 60 | 6 | 0 | -1.869184 | -1.617094 | 2.866065  |
| 61 | 6 | 0 | 2.808518  | 1.565696  | 0.039495  |
| 62 | 6 | 0 | 3.159477  | -1.447637 | 0.481009  |
| 63 | 6 | 0 | 3.859899  | -0.374939 | 1.277992  |
| 64 | 6 | 0 | 3.714563  | 0.932832  | 1.072216  |
| 65 | 6 | 0 | 4.226231  | -2.344554 | -0.199339 |
| 66 | 6 | 0 | 3.688035  | 2.535129  | -0.784733 |
| 67 | 8 | 0 | 2.704803  | -2.589638 | 2.566859  |
| 68 | 8 | 0 | 3.019403  | 1.802404  | 3.709039  |
| 69 | 6 | 0 | 3.960143  | 3.817449  | -0.292093 |
| 70 | 6 | 0 | 4.813675  | 4.678597  | -0.981634 |
| 71 | 6 | 0 | 5.410746  | 4.268226  | -2.175032 |
| 72 | 6 | 0 | 5.150266  | 2.989407  | -2.669343 |
| 73 | 6 | 0 | 4.296941  | 2.128599  | -1.977711 |

Standard orientation:

| Center Number | Atomic Number | Atomic Type | Coordinates (Angstroms) |           |           |
|---------------|---------------|-------------|-------------------------|-----------|-----------|
|               |               |             | X                       | Y         | Z         |
| 1             | 6             | 0           | -2.621638               | 1.426670  | -3.276615 |
| 2             | 6             | 0           | -1.168764               | 1.438899  | -3.332672 |
| 3             | 6             | 0           | -0.485158               | 0.248612  | -3.502601 |
| 4             | 6             | 0           | -1.203755               | -1.006815 | -3.627850 |
| 5             | 6             | 0           | -2.595380               | -1.028420 | -3.537053 |
| 6             | 6             | 0           | -3.319034               | 0.217312  | -3.351392 |
| 7             | 6             | 0           | -0.664557               | 2.428407  | -2.398186 |
| 8             | 6             | 0           | 0.723035                | 0.019037  | -2.755016 |
| 9             | 6             | 0           | -0.413234               | -2.010998 | -2.954177 |
| 10            | 6             | 0           | -3.246671               | -2.057382 | -2.744079 |
| 11            | 6             | 0           | -4.417541               | -0.039366 | -2.435641 |
| 12            | 6             | 0           | -3.028397               | 2.448647  | -2.336892 |
| 13            | 6             | 0           | -2.476826               | -3.032352 | -2.102034 |
| 14            | 6             | 0           | -1.029698               | -3.013072 | -2.216937 |
| 15            | 6             | 0           | -2.793570               | -3.427547 | -0.744762 |
| 16            | 6             | 0           | -0.450699               | -3.400832 | -0.949041 |
| 17            | 6             | 0           | 0.503233                | 2.207188  | -1.631832 |
| 18            | 6             | 0           | 0.784437                | -1.387809 | -2.437092 |
| 19            | 6             | 0           | -1.544111               | -3.669245 | -0.049623 |
| 20            | 6             | 0           | 1.405154                | -1.804313 | -1.261149 |
| 21            | 6             | 0           | 1.235377                | 0.961582  | -1.851766 |
| 22            | 6             | 0           | -4.361980               | -1.440113 | -2.048157 |
| 23            | 6             | 0           | -4.791733               | 0.932325  | -1.505211 |
| 24            | 6             | 0           | 0.603593                | 2.808797  | -0.290341 |
| 25            | 6             | 0           | -4.102706               | 2.211228  | -1.468336 |

|    |   |   |          |           |           |    |   |   |           |           |           |
|----|---|---|----------|-----------|-----------|----|---|---|-----------|-----------|-----------|
| 74 | 6 | 0 | 5.159361 | -1.729320 | -1.046166 | 87 | 1 | 0 | 4.097466  | 1.137880  | -2.374014 |
| 75 | 6 | 0 | 6.122284 | -2.483846 | -1.711935 | 88 | 1 | 0 | 5.133663  | -0.650782 | -1.170223 |
| 76 | 6 | 0 | 6.169227 | -3.869848 | -1.540797 | 89 | 1 | 0 | 6.838535  | -1.988451 | -2.362028 |
| 77 | 6 | 0 | 5.250146 | -4.487846 | -0.694343 | 90 | 1 | 0 | 6.920041  | -4.460554 | -2.058329 |
| 78 | 6 | 0 | 4.284533 | -3.730804 | -0.025433 | 91 | 1 | 0 | 5.282338  | -5.563699 | -0.545017 |
| 79 | 8 | 0 | 0.286103 | -1.862525 | 4.016519  | 92 | 1 | 0 | 3.592395  | -4.234153 | 0.641130  |
| 80 | 8 | 0 | 0.767870 | 0.646849  | 5.160906  | 93 | 8 | 0 | 0.887613  | -0.214908 | 1.673055  |
| 81 | 1 | 0 | 4.528153 | -0.735081 | 2.053063  | 94 | 1 | 0 | -0.073776 | -0.229878 | 1.567380  |
| 82 | 1 | 0 | 4.273020 | 1.631332  | 1.684223  | 95 | 1 | 0 | 1.058112  | -0.598123 | 2.546616  |
| 83 | 1 | 0 | 3.500171 | 4.143291  | 0.636923  |    |   |   |           |           |           |
| 84 | 1 | 0 | 5.010550 | 5.671108  | -0.585359 |    |   |   |           |           |           |
| 85 | 1 | 0 | 6.073498 | 4.939245  | -2.714425 |    |   |   |           |           |           |
| 86 | 1 | 0 | 5.609603 | 2.658317  | -3.596944 |    |   |   |           |           |           |

-----  
An imaginary frequency was found at  $-57.51 \text{ cm}^{-1}$ .

The total electronic energy was calculated to be  $-3280.5357607$  Hartree.

**Table S42.** Optimized structure of **TS2e** (B3LYP-D3/6-31G(d))

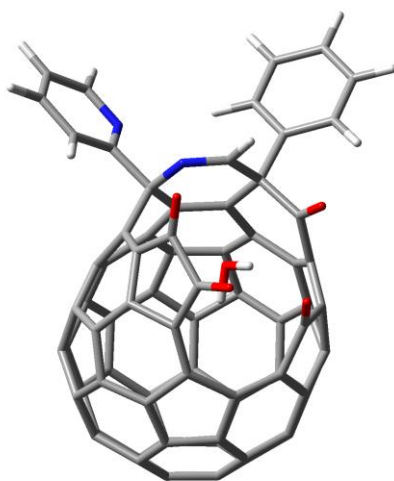

Standard orientation:

| Center Number | Atomic Number | Atomic Type | Coordinates (Angstroms) |           |           |
|---------------|---------------|-------------|-------------------------|-----------|-----------|
|               |               |             | X                       | Y         | Z         |
| 1             | 6             | 0           | -2.710870               | 1.540745  | -3.189112 |
| 2             | 6             | 0           | -1.259634               | 1.559162  | -3.274384 |
| 3             | 6             | 0           | -0.577301               | 0.378135  | -3.507202 |
| 4             | 6             | 0           | -1.296411               | -0.873217 | -3.667400 |
| 5             | 6             | 0           | -2.685671               | -0.901828 | -3.548013 |
| 6             | 6             | 0           | -3.407405               | 0.333539  | -3.297981 |
| 7             | 6             | 0           | -0.739179               | 2.512654  | -2.311557 |
| 8             | 6             | 0           | 0.646290                | 0.121624  | -2.794841 |
| 9             | 6             | 0           | -0.490000               | -1.901779 | -3.051612 |
| 10            | 6             | 0           | -3.318558               | -1.963291 | -2.783607 |
| 11            | 6             | 0           | -4.486864               | 0.037846  | -2.371353 |
| 12            | 6             | 0           | -3.100876               | 2.523979  | -2.201974 |
| 13            | 6             | 0           | -2.533353               | -2.960633 | -2.196954 |
| 14            | 6             | 0           | -1.088988               | -2.934375 | -2.341983 |
| 15            | 6             | 0           | -2.821254               | -3.410100 | -0.850370 |
| 16            | 6             | 0           | -0.483040               | -3.372201 | -1.102659 |
| 17            | 6             | 0           | 0.443467                | 2.262450  | -1.577364 |
| 18            | 6             | 0           | 0.718113                | -1.297584 | -2.536829 |
| 19            | 6             | 0           | -1.557074               | -3.675892 | -0.191610 |
| 20            | 6             | 0           | 1.362328                | -1.762318 | -1.391194 |
| 21            | 6             | 0           | 1.171089                | 1.030120  | -1.864363 |
| 22            | 6             | 0           | -4.420543               | -1.377111 | -2.041040 |
| 23            | 6             | 0           | -4.843751               | 0.970911  | -1.395644 |
| 24            | 6             | 0           | 0.570992                | 2.808516  | -0.213061 |
| 25            | 6             | 0           | -4.157058               | 2.249666  | -1.322233 |

|    |   |   |           |           |           |
|----|---|---|-----------|-----------|-----------|
| 26 | 6 | 0 | -1.893700 | 3.156948  | -1.708232 |
| 27 | 6 | 0 | -5.101036 | 0.529623  | -0.035063 |
| 28 | 6 | 0 | -4.036786 | 2.618558  | 0.072379  |
| 29 | 6 | 0 | -1.815691 | 3.581996  | -0.394988 |
| 30 | 6 | 0 | 0.731570  | -2.841309 | -0.619683 |
| 31 | 6 | 0 | -4.682055 | -1.799812 | -0.731895 |
| 32 | 6 | 0 | 2.112392  | 0.519358  | -0.903205 |
| 33 | 6 | 0 | -4.571523 | 1.527712  | 0.871875  |
| 34 | 6 | 0 | -2.914074 | 3.303554  | 0.520504  |
| 35 | 6 | 0 | -0.571210 | 3.446599  | 0.320671  |
| 36 | 6 | 0 | -0.914635 | 3.200178  | 1.691136  |
| 37 | 6 | 0 | 1.591235  | 2.311088  | 0.708362  |
| 38 | 6 | 0 | 2.236844  | -0.838631 | -0.710526 |
| 39 | 6 | 0 | 2.311301  | -2.359657 | 1.288108  |
| 40 | 6 | 0 | -2.317600 | 2.968616  | 1.793128  |
| 41 | 6 | 0 | -2.739890 | 1.834478  | 2.499214  |
| 42 | 6 | 0 | -1.819675 | 0.937953  | 3.189265  |
| 43 | 6 | 0 | -3.894018 | 1.123755  | 2.026481  |
| 44 | 6 | 0 | -3.862290 | -2.828848 | -0.129087 |
| 45 | 6 | 0 | 1.938537  | 1.665724  | 3.300183  |
| 46 | 6 | 0 | -4.998516 | -0.817898 | 0.295003  |
| 47 | 6 | 0 | -4.317883 | -1.215968 | 1.515963  |
| 48 | 6 | 0 | 1.314796  | 2.288096  | 2.077454  |
| 49 | 6 | 0 | 0.982418  | -2.863693 | 0.807507  |
| 50 | 6 | 0 | -0.103121 | -3.040281 | 1.680483  |
| 51 | 6 | 0 | -0.055391 | 2.492208  | 2.491952  |
| 52 | 6 | 0 | -0.516310 | 1.430364  | 3.373866  |
| 53 | 6 | 0 | -3.710100 | -0.268006 | 2.345444  |
| 54 | 6 | 0 | -2.412179 | -0.472615 | 3.008556  |
| 55 | 6 | 0 | 0.725707  | 1.020429  | 4.098565  |
| 56 | 6 | 0 | -3.650281 | -2.457247 | 1.263434  |
| 57 | 6 | 0 | -1.379134 | -3.365719 | 1.152712  |
| 58 | 6 | 0 | -0.392207 | -2.273280 | 2.985263  |
| 59 | 6 | 0 | -2.431236 | -2.671886 | 1.880829  |
| 60 | 6 | 0 | -1.825759 | -1.741007 | 2.810351  |
| 61 | 6 | 0 | 2.763658  | 1.522970  | 0.052193  |
| 62 | 6 | 0 | 3.129805  | -1.419734 | 0.350363  |
| 63 | 6 | 0 | 3.751529  | -0.317337 | 1.204088  |
| 64 | 7 | 0 | 3.616046  | 0.937114  | 1.079814  |
| 65 | 6 | 0 | 4.302986  | -2.183165 | -0.314104 |
| 66 | 6 | 0 | 3.696753  | 2.477591  | -0.722992 |
| 67 | 8 | 0 | 2.746952  | -2.681232 | 2.377982  |
| 68 | 8 | 0 | 3.060155  | 1.699102  | 3.734950  |
| 69 | 6 | 0 | 4.088814  | 3.694215  | -0.155888 |
| 70 | 6 | 0 | 4.979246  | 4.498906  | -0.860409 |
| 71 | 6 | 0 | 5.449432  | 4.059178  | -2.099413 |
| 72 | 6 | 0 | 5.011120  | 2.822484  | -2.569456 |
| 73 | 7 | 0 | 4.153659  | 2.040179  | -1.900112 |
| 74 | 6 | 0 | 4.949500  | -1.575259 | -1.402739 |
| 75 | 6 | 0 | 6.026438  | -2.204709 | -2.023519 |

|    |   |   |          |           |           |    |   |   |           |           |           |
|----|---|---|----------|-----------|-----------|----|---|---|-----------|-----------|-----------|
| 76 | 6 | 0 | 6.476118 | -3.446223 | -1.568303 | 87 | 1 | 0 | 6.516143  | -1.720575 | -2.864304 |
| 77 | 6 | 0 | 5.846552 | -4.045992 | -0.478514 | 88 | 1 | 0 | 7.314124  | -3.937676 | -2.055122 |
| 78 | 6 | 0 | 4.769297 | -3.417818 | 0.151622  | 89 | 1 | 0 | 6.192609  | -5.007331 | -0.108481 |
| 79 | 8 | 0 | 0.341355 | -2.058597 | 3.922174  | 90 | 1 | 0 | 4.309324  | -3.893704 | 1.009729  |
| 80 | 8 | 0 | 0.839657 | 0.421554  | 5.138918  | 91 | 8 | 0 | 0.951903  | -0.296851 | 1.699162  |
| 81 | 1 | 0 | 4.392217 | -0.674684 | 2.011013  | 92 | 1 | 0 | -0.004362 | -0.264416 | 1.556698  |
| 82 | 1 | 0 | 3.709905 | 3.984307  | 0.818196  | 93 | 1 | 0 | 1.073023  | -0.728981 | 2.558498  |
| 83 | 1 | 0 | 5.303693 | 5.450787  | -0.449199 |    |   |   |           |           |           |
| 84 | 1 | 0 | 6.143276 | 4.654899  | -2.684563 |    |   |   |           |           |           |
| 85 | 1 | 0 | 5.361098 | 2.435497  | -3.524591 |    |   |   |           |           |           |
| 86 | 1 | 0 | 4.615676 | -0.603998 | -1.758850 |    |   |   |           |           |           |

An imaginary frequency was found at  $-44.44\text{ cm}^{-1}$ .

The total electronic energy was calculated to be  $-3312.6123696$  Hartree.

**Table S43.** Optimized structure of **TS2f** (B3LYP-D3/6-31G(d))

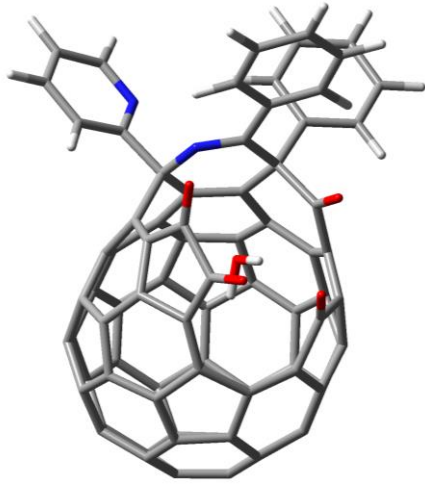

Standard orientation:

| Center Number | Atomic Number | Atomic Type | Coordinates (Angstroms) |           |           |
|---------------|---------------|-------------|-------------------------|-----------|-----------|
|               |               |             | X                       | Y         | Z         |
| 1             | 6             | 0           | -3.759361               | 1.372523  | -2.809895 |
| 2             | 6             | 0           | -2.348622               | 1.465392  | -3.148636 |
| 3             | 6             | 0           | -1.651903               | 0.316414  | -3.480241 |
| 4             | 6             | 0           | -2.315899               | -0.974618 | -3.491892 |
| 5             | 6             | 0           | -3.659800               | -1.073476 | -3.131565 |
| 6             | 6             | 0           | -4.395593               | 0.128010  | -2.777839 |
| 7             | 6             | 0           | -1.722555               | 2.466534  | -2.304402 |
| 8             | 6             | 0           | -0.310095               | 0.142600  | -2.992555 |
| 9             | 6             | 0           | -1.357767               | -1.943150 | -3.009300 |
| 10            | 6             | 0           | -4.090338               | -2.147519 | -2.252744 |
| 11            | 6             | 0           | -5.279391               | -0.201572 | -1.672256 |
| 12            | 6             | 0           | -4.025650               | 2.356928  | -1.783409 |
| 13            | 6             | 0           | -3.160437               | -3.087136 | -1.796680 |
| 14            | 6             | 0           | -1.766692               | -2.988559 | -2.191725 |
| 15            | 6             | 0           | -3.184594               | -3.517209 | -0.413642 |
| 16            | 6             | 0           | -0.932031               | -3.361356 | -1.070278 |
| 17            | 6             | 0           | -0.417781               | 2.296414  | -1.786143 |
| 18            | 6             | 0           | -0.114531               | -1.262425 | -2.723081 |
| 19            | 6             | 0           | -1.812518               | -3.699861 | 0.018734  |
| 20            | 6             | 0           | 0.743312                | -1.661262 | -1.698465 |
| 21            | 6             | 0           | 0.318051                | 1.099074  | -2.182577 |
| 22            | 6             | 0           | -5.078597               | -1.602914 | -1.338293 |
| 23            | 6             | 0           | -5.512596               | 0.734479  | -0.662959 |
| 24            | 6             | 0           | -0.086970               | 2.878467  | -0.471497 |
| 25            | 6             | 0           | -4.896370               | 2.049112  | -0.728961 |
| 26            | 6             | 0           | -2.788561               | 3.063917  | -1.517163 |
| 27            | 6             | 0           | -5.506270               | 0.312986  | 0.727513  |
| 28            | 6             | 0           | -4.556763               | 2.456557  | 0.617974  |
| 29            | 6             | 0           | -2.507606               | 3.522293  | -0.243031 |
| 30            | 6             | 0           | 0.314460                | -2.752062 | -0.815065 |
| 31            | 6             | 0           | -5.086414               | -2.007777 | 0.002515  |
| 32            | 6             | 0           | 1.437055                | 0.661281  | -1.394324 |
| 33            | 6             | 0           | -4.884293               | 1.358893  | 1.513790  |
| 34            | 6             | 0           | -3.413092               | 3.209376  | 0.854387  |
| 35            | 6             | 0           | -1.152444               | 3.466972  | 0.246173  |
| 36            | 6             | 0           | -1.237794               | 3.233718  | 1.659080  |
| 37            | 6             | 0           | 1.101190                | 2.453200  | 0.264009  |
| 38            | 6             | 0           | 1.675812                | -0.677945 | -1.196947 |
| 39            | 6             | 0           | 2.157300                | -2.120325 | 0.798655  |
| 40            | 6             | 0           | -2.587170               | 2.934583  | 2.008171  |
| 41            | 6             | 0           | -2.818740               | 1.798138  | 2.794092  |
| 42            | 6             | 0           | -1.745506               | 0.966380  | 3.326900  |
| 43            | 6             | 0           | -3.996831               | 1.018415  | 2.538813  |
| 44            | 6             | 0           | -4.117941               | -2.977163 | 0.468954  |
| 45            | 6             | 0           | 1.930984                | 1.887492  | 2.757291  |
| 46            | 6             | 0           | -5.275389               | -1.019595 | 1.054722  |
| 47            | 6             | 0           | -4.373695               | -1.352364 | 2.145187  |
| 48            | 6             | 0           | 1.069966                | 2.446404  | 1.659206  |
| 49            | 6             | 0           | 0.805734                | -2.720888 | 0.544859  |
| 50            | 6             | 0           | -0.095828               | -2.940119 | 1.598941  |
| 51            | 6             | 0           | -0.215501               | 2.587142  | 2.306072  |
| 52            | 6             | 0           | -0.456261               | 1.525129  | 3.271135  |
| 53            | 6             | 0           | -3.686854               | -0.353664 | 2.843391  |
| 54            | 6             | 0           | -2.284995               | -0.474271 | 3.273207  |
| 55            | 6             | 0           | 0.916665                | 1.206581  | 3.776555  |
| 56            | 6             | 0           | -3.690870               | -2.562862 | 1.798771  |
| 57            | 6             | 0           | -1.422486               | -3.350776 | 1.308266  |
| 58            | 6             | 0           | -0.197874               | -2.139207 | 2.911993  |
| 59            | 6             | 0           | -2.372882               | -2.698542 | 2.198220  |
| 60            | 6             | 0           | -1.671227               | -1.711812 | 2.990555  |
| 61            | 6             | 0           | 2.177952                | 1.709548  | -0.572933 |
| 62            | 6             | 0           | 2.789260                | -1.204787 | -0.312058 |
| 63            | 6             | 0           | 3.587541                | -0.040655 | 0.342843  |
| 64            | 7             | 0           | 3.239202                | 1.188401  | 0.252313  |
| 65            | 6             | 0           | 3.693667                | -2.027900 | -1.260738 |
| 66            | 6             | 0           | 2.912972                | 2.697496  | -1.513718 |
| 67            | 8             | 0           | 2.733331                | -2.360168 | 1.840023  |
| 68            | 8             | 0           | 3.106181                | 2.006112  | 2.993398  |
| 69            | 6             | 0           | 3.175664                | 4.012833  | -1.121023 |
| 70            | 6             | 0           | 3.905587                | 4.830810  | -1.979967 |
| 71            | 6             | 0           | 4.349993                | 4.306987  | -3.194468 |
| 72            | 6             | 0           | 4.048566                | 2.977065  | -3.486591 |
| 73            | 7             | 0           | 3.347790                | 2.182549  | -2.668366 |
| 74            | 6             | 0           | 4.397652                | -1.335508 | -2.255499 |
| 75            | 6             | 0           | 5.197229                | -2.028242 | -3.162317 |
| 76            | 6             | 0           | 5.295058                | -3.420210 | -3.097652 |
| 77            | 6             | 0           | 4.582790                | -4.114381 | -2.119901 |
| 78            | 6             | 0           | 3.783888                | -3.422760 | -1.207000 |
| 79            | 8             | 0           | 0.672218                | -1.821806 | 3.688756  |



|    |   |   |          |           |           |     |   |   |           |           |           |
|----|---|---|----------|-----------|-----------|-----|---|---|-----------|-----------|-----------|
| 80 | 8 | 0 | 1.245910 | 0.672697  | 4.805706  | 94  | 1 | 0 | 4.648134  | -5.197400 | -2.060228 |
| 81 | 6 | 0 | 6.654758 | -1.708969 | 1.934831  | 95  | 1 | 0 | 3.251491  | -3.981052 | -0.442781 |
| 82 | 6 | 0 | 5.442875 | -1.560898 | 1.262851  | 96  | 1 | 0 | 7.078715  | -2.702586 | 2.051917  |
| 83 | 6 | 0 | 4.862255 | -0.293628 | 1.090949  | 97  | 1 | 0 | 4.958067  | -2.445955 | 0.883848  |
| 84 | 6 | 0 | 5.545586 | 0.820934  | 1.617431  | 98  | 1 | 0 | 5.104102  | 1.800511  | 1.496328  |
| 85 | 6 | 0 | 6.749173 | 0.670030  | 2.296334  | 99  | 1 | 0 | 7.247364  | 1.546417  | 2.702204  |
| 86 | 6 | 0 | 7.314245 | -0.597180 | 2.456956  | 100 | 1 | 0 | 8.257275  | -0.716076 | 2.984413  |
| 87 | 1 | 0 | 2.820766 | 4.376569  | -0.162820 | 101 | 8 | 0 | 0.625791  | -0.136161 | 1.253828  |
| 88 | 1 | 0 | 4.125303 | 5.858714  | -1.704785 | 102 | 1 | 0 | 0.923509  | -0.460551 | 2.115769  |
| 89 | 1 | 0 | 4.919934 | 4.908651  | -3.895753 | 103 | 1 | 0 | -0.340317 | -0.134633 | 1.301263  |
| 90 | 1 | 0 | 4.383629 | 2.523704  | -4.417698 |     |   |   |           |           |           |
| 91 | 1 | 0 | 4.300982 | -0.255212 | -2.328982 |     |   |   |           |           |           |
| 92 | 1 | 0 | 5.742396 | -1.477464 | -3.924110 |     |   |   |           |           |           |
| 93 | 1 | 0 | 5.919081 | -3.959025 | -3.805300 |     |   |   |           |           |           |

-----

An imaginary frequency was found at  $-78.31\text{ cm}^{-1}$ .

The total electronic energy was calculated to be  $-3543.6782559$  Hartree.

**Table S44.** Optimized structure of  $\text{H}_2\text{O}@$ INT1a (B3LYP-D3/6-31G(d))

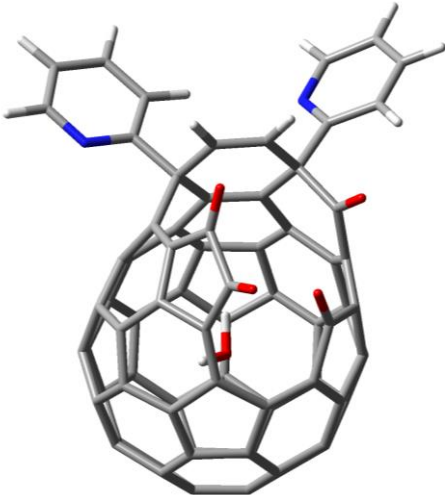

|    |   |   |           |           |           |
|----|---|---|-----------|-----------|-----------|
| 25 | 6 | 0 | 0.570341  | 2.762199  | -0.192815 |
| 26 | 8 | 0 | 0.480377  | -1.334162 | 3.674882  |
| 27 | 6 | 0 | -0.665369 | 2.420169  | -2.325062 |
| 28 | 6 | 0 | 4.143039  | 4.832396  | -1.163993 |
| 29 | 6 | 0 | -1.852747 | 3.038763  | -1.760310 |
| 30 | 6 | 0 | 3.616632  | 2.645974  | -0.728143 |
| 31 | 6 | 0 | 0.506889  | 2.220399  | -1.560290 |
| 32 | 6 | 0 | 0.810781  | 0.070927  | -2.738772 |
| 33 | 6 | 0 | 2.228575  | 0.553879  | -0.819838 |
| 34 | 6 | 0 | -1.822930 | 3.479593  | -0.449598 |
| 35 | 6 | 0 | -0.408259 | 0.271144  | -3.477096 |
| 36 | 6 | 0 | -0.977279 | 3.118066  | 1.666344  |
| 37 | 6 | 0 | -1.132938 | 1.433638  | -3.280723 |
| 38 | 6 | 0 | 0.924040  | -1.341876 | -2.443464 |
| 39 | 6 | 0 | 0.925878  | -2.797365 | -0.469607 |
| 40 | 6 | 0 | -0.599973 | 3.362823  | 0.304974  |
| 41 | 6 | 0 | 5.026910  | -3.256968 | 0.527524  |
| 42 | 6 | 0 | 4.408526  | -2.200070 | -0.149226 |
| 43 | 6 | 0 | -4.040721 | 2.488512  | -0.032607 |
| 44 | 6 | 0 | -0.260316 | -3.382915 | -0.951459 |
| 45 | 6 | 0 | -0.260804 | -1.993664 | -2.957056 |
| 46 | 6 | 0 | 6.064206  | -3.937667 | -0.108954 |
| 47 | 6 | 0 | -0.145199 | 2.387874  | 2.477500  |
| 48 | 6 | 0 | -2.583538 | 1.373931  | -3.229709 |
| 49 | 6 | 0 | 5.090702  | 4.475994  | -2.121380 |
| 50 | 6 | 0 | -4.592143 | 1.411063  | 0.775959  |
| 51 | 6 | 0 | -3.238368 | 0.144191  | -3.323460 |
| 52 | 6 | 0 | -2.388574 | 2.909011  | 1.738507  |
| 53 | 6 | 0 | 6.452656  | -3.541683 | -1.387470 |
| 54 | 6 | 0 | 4.555163  | 2.180921  | -1.660146 |
| 55 | 6 | 0 | -2.841209 | 1.805286  | 2.470897  |
| 56 | 6 | 0 | 5.782987  | -2.465832 | -1.970956 |
| 57 | 6 | 0 | -1.084689 | -1.005946 | -3.615264 |
| 58 | 6 | 0 | -5.051229 | 0.371807  | -0.123531 |
| 59 | 6 | 0 | -4.287852 | -1.308826 | 1.507809  |
| 60 | 6 | 0 | -2.945445 | 3.205981  | 0.437461  |
| 61 | 6 | 0 | -1.347950 | -3.679381 | -0.052755 |
| 62 | 6 | 0 | -3.027714 | 2.365328  | -2.274538 |
| 63 | 6 | 0 | -4.334581 | -0.161053 | -2.421557 |
| 64 | 6 | 0 | -3.970048 | 1.060658  | 1.978027  |
| 65 | 6 | 0 | 5.300424  | 3.117203  | -2.369434 |
| 66 | 6 | 0 | -1.223857 | -3.287842 | 1.275368  |
| 67 | 6 | 0 | -3.774956 | -0.318855 | 2.350636  |
| 68 | 6 | 0 | -4.750262 | 0.784094  | -1.483455 |
| 69 | 6 | 0 | -4.100861 | 2.081929  | -1.420391 |
| 70 | 6 | 0 | -2.330472 | -2.650322 | 1.963875  |
| 71 | 6 | 0 | -2.473332 | -1.073227 | -3.522007 |
| 72 | 6 | 0 | -3.092634 | -2.130923 | -2.742983 |
| 73 | 6 | 0 | -0.847850 | -3.014722 | -2.220672 |

Standard orientation:

| Center Number | Atomic Number | Atomic Type | Coordinates (Angstroms) |           |           |
|---------------|---------------|-------------|-------------------------|-----------|-----------|
|               |               |             | X                       | Y         | Z         |
| 1             | 6             | 0           | 3.968808                | -0.258305 | 1.300184  |
| 2             | 6             | 0           | 3.768395                | 1.041698  | 1.112069  |
| 3             | 6             | 0           | 2.814963                | 1.624141  | 0.101477  |
| 4             | 6             | 0           | 1.573071                | 2.267903  | 0.754100  |
| 5             | 6             | 0           | 1.227957                | 2.137870  | 2.100510  |
| 6             | 6             | 0           | 1.814450                | 1.536179  | 3.359281  |
| 7             | 6             | 0           | 0.575150                | 1.093571  | 4.238676  |
| 8             | 6             | 0           | -0.633616               | 1.397570  | 3.410146  |
| 9             | 6             | 0           | -1.943380               | 0.939157  | 3.223377  |
| 10            | 6             | 0           | -2.497791               | -0.456437 | 3.061902  |
| 11            | 6             | 0           | -1.807019               | -1.660632 | 2.875843  |
| 12            | 6             | 0           | -0.311155               | -1.905949 | 2.958929  |
| 13            | 6             | 0           | 0.012517                | -2.833951 | 1.797284  |
| 14            | 6             | 0           | 1.120755                | -2.697584 | 0.963364  |
| 15            | 6             | 0           | 2.434292                | -2.205953 | 1.466416  |
| 16            | 6             | 0           | 3.290571                | -1.340738 | 0.495864  |
| 17            | 7             | 0           | 4.786435                | -1.804155 | -1.373158 |
| 18            | 8             | 0           | 2.949982                | 1.486805  | 3.764088  |
| 19            | 8             | 0           | 2.847036                | -2.507905 | 2.569498  |
| 20            | 7             | 0           | 3.415518                | 3.941631  | -0.474546 |
| 21            | 6             | 0           | 2.402348                | -0.790326 | -0.594189 |
| 22            | 6             | 0           | 1.286326                | 1.012866  | -1.816594 |
| 23            | 8             | 0           | 0.635578                | 0.827506  | 5.411919  |
| 24            | 6             | 0           | 1.559830                | -1.750951 | -1.274037 |

|    |   |   |           |           |           |    |   |   |           |           |           |
|----|---|---|-----------|-----------|-----------|----|---|---|-----------|-----------|-----------|
| 74 | 6 | 0 | -4.523671 | -1.956776 | -0.739677 | 85 | 1 | 0 | 6.559930  | -4.765262 | 0.390985  |
| 75 | 6 | 0 | -2.293210 | -3.082112 | -2.105719 | 86 | 1 | 0 | 5.649525  | 5.240314  | -2.652769 |
| 76 | 6 | 0 | -2.601971 | -3.494829 | -0.751991 | 87 | 1 | 0 | 7.253707  | -4.045984 | -1.919025 |
| 77 | 6 | 0 | -3.545237 | -2.521013 | 1.310782  | 88 | 1 | 0 | 4.688665  | 1.112527  | -1.809662 |
| 78 | 6 | 0 | -4.919662 | -0.963613 | 0.246550  | 89 | 1 | 0 | 6.056887  | -2.115312 | -2.964485 |
| 79 | 6 | 0 | -3.684630 | -2.932304 | -0.078965 | 90 | 1 | 0 | 6.033998  | 2.794038  | -3.103126 |
| 80 | 6 | 0 | -4.233709 | -1.562109 | -2.049949 | 91 | 8 | 0 | -1.616614 | -0.205894 | -0.291033 |
| 81 | 1 | 0 | 4.634814  | -0.605786 | 2.082622  | 92 | 1 | 0 | -1.775212 | 0.546655  | 0.297531  |
| 82 | 1 | 0 | 4.275862  | 1.762871  | 1.741634  | 93 | 1 | 0 | -0.675083 | -0.136278 | -0.508060 |
| 83 | 1 | 0 | 3.953579  | 5.879252  | -0.933800 |    |   |   |           |           |           |
| 84 | 1 | 0 | 4.710594  | -3.532079 | 1.526466  |    |   |   |           |           |           |

The total electronic energy was calculated to be -3312.6523731 Hartree.

**Table S45.** Optimized structure of H<sub>2</sub>O@INT1b (B3LYP-D3/6-31G(d))

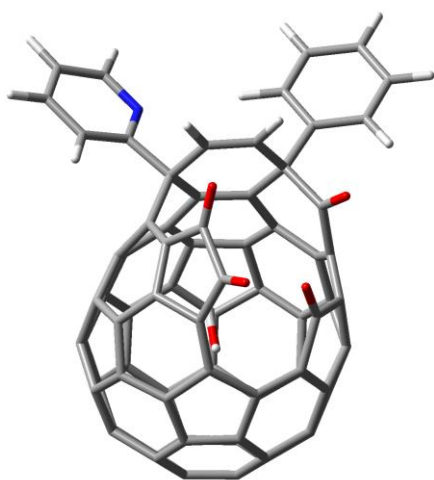

Standard orientation:

| Center Number | Atomic Number | Atomic Type | Coordinates (Angstroms) |           |           |
|---------------|---------------|-------------|-------------------------|-----------|-----------|
|               |               |             | X                       | Y         | Z         |
| 1             | 6             | 0           | -2.539403               | 1.244603  | -3.312877 |
| 2             | 6             | 0           | -1.087422               | 1.294378  | -3.351576 |
| 3             | 6             | 0           | -0.367351               | 0.119430  | -3.484469 |
| 4             | 6             | 0           | -1.050130               | -1.159569 | -3.571861 |
| 5             | 6             | 0           | -2.440475               | -1.214326 | -3.491832 |
| 6             | 6             | 0           | -3.200529               | 0.015374  | -3.357784 |
| 7             | 6             | 0           | -0.624507               | 2.319561  | -2.435078 |
| 8             | 6             | 0           | 0.843319                | -0.053496 | -2.725183 |
| 9             | 6             | 0           | -0.239995               | -2.120315 | -2.858885 |
| 10            | 6             | 0           | -3.075096               | -2.232096 | -2.672925 |
| 11            | 6             | 0           | -4.308432               | -0.242274 | -2.455204 |
| 12            | 6             | 0           | -2.987660               | 2.279486  | -2.407501 |
| 13            | 6             | 0           | -2.288180               | -3.157126 | -1.983116 |
| 14            | 6             | 0           | -0.841452               | -3.103237 | -2.083503 |
| 15            | 6             | 0           | -2.615097               | -3.505943 | -0.615887 |
| 16            | 6             | 0           | -0.271119               | -3.415741 | -0.791881 |
| 17            | 6             | 0           | 0.540223                | 2.148123  | -1.651423 |
| 18            | 6             | 0           | 0.942500                | -1.451563 | -2.361561 |
| 19            | 6             | 0           | -1.370207               | -3.666504 | 0.106117  |
| 20            | 6             | 0           | 1.558005                | -1.806693 | -1.164558 |
| 21            | 6             | 0           | 1.318486                | 0.928359  | -1.844708 |
| 22            | 6             | 0           | -4.220594               | -1.625891 | -2.019909 |
| 23            | 6             | 0           | -4.728676               | 0.746474  | -1.565692 |
| 24            | 6             | 0           | 0.587284                | 2.746184  | -0.305913 |
| 25            | 6             | 0           | -4.070880               | 2.040874  | -1.553183 |
| 26            | 6             | 0           | -1.814638               | 2.967626  | -1.910189 |
| 27            | 6             | 0           | -5.046592               | 0.397650  | -0.192373 |

|    |   |   |           |           |           |
|----|---|---|-----------|-----------|-----------|
| 28 | 6 | 0 | -4.024276 | 2.509577  | -0.185198 |
| 29 | 6 | 0 | -1.798123 | 3.467530  | -0.621293 |
| 30 | 6 | 0 | 0.911352  | -2.813673 | -0.322178 |
| 31 | 6 | 0 | -4.528357 | -1.959544 | -0.696965 |
| 32 | 6 | 0 | 2.248986  | 0.512557  | -0.819077 |
| 33 | 6 | 0 | -4.591120 | 1.473463  | 0.664426  |
| 34 | 6 | 0 | -2.931300 | 3.241347  | 0.264210  |
| 35 | 6 | 0 | -0.585445 | 3.374718  | 0.151391  |
| 36 | 6 | 0 | -0.979512 | 3.193804  | 1.517451  |
| 37 | 6 | 0 | 1.573649  | 2.284873  | 0.675638  |
| 38 | 6 | 0 | 2.396664  | -0.820103 | -0.517327 |
| 39 | 6 | 0 | 2.406104  | -2.139536 | 1.599889  |
| 40 | 6 | 0 | -2.392296 | 3.000264  | 1.583370  |
| 41 | 6 | 0 | -2.859980 | 1.934911  | 2.360380  |
| 42 | 6 | 0 | -1.976720 | 1.099244  | 3.163873  |
| 43 | 6 | 0 | -3.988048 | 1.175812  | 1.889288  |
| 44 | 6 | 0 | -3.703079 | -2.908848 | 0.017172  |
| 45 | 6 | 0 | 1.784618  | 1.686183  | 3.318902  |
| 46 | 6 | 0 | -4.929328 | -0.920334 | 0.238649  |
| 47 | 6 | 0 | -4.313859 | -1.211287 | 1.521421  |
| 48 | 6 | 0 | 1.213574  | 2.224207  | 2.023995  |
| 49 | 6 | 0 | 1.093454  | -2.651316 | 1.106110  |
| 50 | 6 | 0 | -0.024593 | -2.747112 | 1.933506  |
| 51 | 6 | 0 | -0.161272 | 2.498737  | 2.372627  |
| 52 | 6 | 0 | -0.665032 | 1.556032  | 3.345668  |
| 53 | 6 | 0 | -3.806836 | -0.186732 | 2.326397  |
| 54 | 6 | 0 | -2.538689 | -0.300418 | 3.059242  |
| 55 | 6 | 0 | 0.532932  | 1.284693  | 4.201850  |
| 56 | 6 | 0 | -3.576226 | -2.435387 | 1.388325  |
| 57 | 6 | 0 | -1.258213 | -3.218140 | 1.417327  |
| 58 | 6 | 0 | -2.370121 | -2.543718 | 2.062002  |
| 59 | 6 | 0 | -1.851494 | -1.516584 | 2.934816  |
| 60 | 6 | 0 | 2.826767  | 1.617243  | 0.065630  |
| 61 | 6 | 0 | 3.278525  | -1.331484 | 0.599653  |
| 62 | 6 | 0 | 3.953095  | -0.219436 | 1.360585  |
| 63 | 6 | 0 | 3.767745  | 1.072498  | 1.111253  |
| 64 | 6 | 0 | 4.379139  | -2.229287 | -0.022732 |
| 65 | 6 | 0 | 3.645051  | 2.601984  | -0.792610 |
| 66 | 8 | 0 | 2.800907  | -2.389439 | 2.721416  |
| 67 | 8 | 0 | 2.914714  | 1.669935  | 3.740010  |
| 68 | 6 | 0 | 3.707350  | 3.966853  | -0.496903 |
| 69 | 6 | 0 | 4.525061  | 4.784002  | -1.276361 |
| 70 | 6 | 0 | 5.250330  | 4.212071  | -2.320260 |
| 71 | 6 | 0 | 5.127488  | 2.837418  | -2.529707 |
| 72 | 7 | 0 | 4.349206  | 2.043704  | -1.787052 |
| 73 | 6 | 0 | 5.124533  | -1.695378 | -1.085439 |
| 74 | 6 | 0 | 6.135868  | -2.445373 | -1.681124 |
| 75 | 6 | 0 | 6.419215  | -3.735319 | -1.223610 |
| 76 | 6 | 0 | 5.688793  | -4.262996 | -0.160196 |
| 77 | 6 | 0 | 4.673964  | -3.513695 | 0.442371  |
| 78 | 8 | 0 | 0.579174  | 1.072083  | 5.386228  |
| 79 | 6 | 0 | -0.356265 | -1.768753 | 3.049477  |

|    |   |   |          |           |           |    |   |   |           |           |           |
|----|---|---|----------|-----------|-----------|----|---|---|-----------|-----------|-----------|
| 80 | 8 | 0 | 0.426271 | -1.167464 | 3.750863  | 89 | 1 | 0 | 7.207305  | -4.320652 | -1.689592 |
| 81 | 1 | 0 | 4.612480 | -0.538538 | 2.160213  | 90 | 1 | 0 | 5.906462  | -5.261115 | 0.210414  |
| 82 | 1 | 0 | 4.281363 | 1.815718  | 1.709904  | 91 | 1 | 0 | 4.131764  | -3.934354 | 1.281808  |
| 83 | 1 | 0 | 3.125572 | 4.377581  | 0.321844  | 92 | 8 | 0 | -1.653603 | -0.183729 | -0.328078 |
| 84 | 1 | 0 | 4.591469 | 5.848886  | -1.071082 | 93 | 1 | 0 | -0.757276 | -0.035928 | -0.663798 |
| 85 | 1 | 0 | 5.896541 | 4.809815  | -2.955501 | 94 | 1 | 0 | -1.610615 | 0.108090  | 0.593980  |
| 86 | 1 | 0 | 5.679452 | 2.348076  | -3.330097 |    |   |   |           |           |           |
| 87 | 1 | 0 | 4.913160 | -0.687896 | -1.436691 |    |   |   |           |           |           |
| 88 | 1 | 0 | 6.705464 | -2.020184 | -2.503342 |    |   |   |           |           |           |

The total electronic energy was calculated to be -3296.6130923 Hartree.

**Table S46.** Optimized structure of H<sub>2</sub>O@INT1c (B3LYP-D3/6-31G(d))

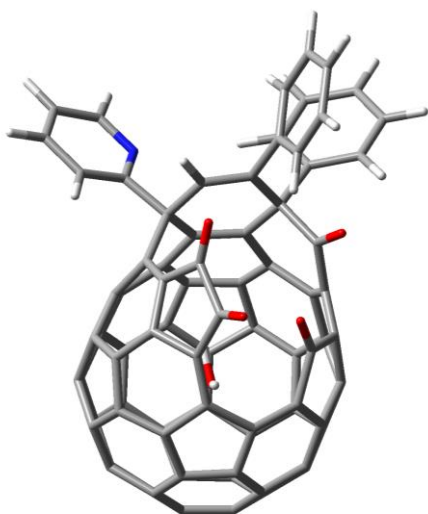

Standard orientation:

| Center Number | Atomic Number | Atomic Type | Coordinates (Angstroms) |           |           |
|---------------|---------------|-------------|-------------------------|-----------|-----------|
|               |               |             | X                       | Y         | Z         |
| 1             | 6             | 0           | -3.696698               | 1.777303  | -2.530784 |
| 2             | 6             | 0           | -2.285818               | 1.997626  | -2.798832 |
| 3             | 6             | 0           | -1.527541               | 0.976631  | -3.346160 |
| 4             | 6             | 0           | -2.127338               | -0.312601 | -3.641490 |
| 5             | 6             | 0           | -3.470205               | -0.540913 | -3.345172 |
| 6             | 6             | 0           | -4.270970               | 0.528228  | -2.776344 |
| 7             | 6             | 0           | -1.726700               | 2.819409  | -1.742145 |
| 8             | 6             | 0           | -0.186005               | 0.764148  | -2.870979 |
| 9             | 6             | 0           | -1.133080               | -1.318467 | -3.345675 |
| 10            | 6             | 0           | -3.867346               | -1.789182 | -2.717765 |
| 11            | 6             | 0           | -5.165441               | -0.060059 | -1.795001 |
| 12            | 6             | 0           | -4.033027               | 2.510841  | -1.330370 |
| 13            | 6             | 0           | -2.902618               | -2.757209 | -2.430256 |
| 14            | 6             | 0           | -1.509125               | -2.519922 | -2.758970 |
| 15            | 6             | 0           | -2.936036               | -3.454726 | -1.161085 |
| 16            | 6             | 0           | -0.681355               | -3.066377 | -1.707317 |
| 17            | 6             | 0           | -0.426656               | 2.593699  | -1.232601 |
| 18            | 6             | 0           | 0.076523                | -0.659527 | -2.902442 |
| 19            | 6             | 0           | -1.567160               | -3.641806 | -0.726677 |
| 20            | 6             | 0           | 0.933739                | -1.219228 | -1.960166 |
| 21            | 6             | 0           | 0.377882                | 1.548539  | -1.856483 |
| 22            | 6             | 0           | -4.903631               | -1.488382 | -1.747356 |
| 23            | 6             | 0           | -5.473341               | 0.635281  | -0.625797 |
| 24            | 6             | 0           | -0.163403               | 2.857939  | 0.192317  |
| 25            | 6             | 0           | -4.914802               | 1.955322  | -0.395488 |
| 26            | 6             | 0           | -2.835258               | 3.187004  | -0.877829 |
| 27            | 6             | 0           | -5.499155               | -0.062961 | 0.647154  |

|    |   |   |           |           |           |
|----|---|---|-----------|-----------|-----------|
| 28 | 6 | 0 | -4.640009 | 2.088072  | 1.018728  |
| 29 | 6 | 0 | -2.607235 | 3.366363  | 0.473849  |
| 30 | 6 | 0 | 0.527498  | -2.464226 | -1.310956 |
| 31 | 6 | 0 | -4.928753 | -2.159148 | -0.520037 |
| 32 | 6 | 0 | 1.512179  | 1.004609  | -1.141777 |
| 33 | 6 | 0 | -4.961999 | 0.822694  | 1.660031  |
| 34 | 6 | 0 | -3.534221 | 2.811346  | 1.449816  |
| 35 | 6 | 0 | -1.266252 | 3.229835  | 0.983935  |
| 36 | 6 | 0 | -1.381709 | 2.692074  | 2.307656  |
| 37 | 6 | 0 | 1.018197  | 2.286376  | 0.845048  |
| 38 | 6 | 0 | 1.815685  | -0.330448 | -1.227251 |
| 39 | 6 | 0 | 2.319658  | -2.102307 | 0.435677  |
| 40 | 6 | 0 | -2.739819 | 2.328569  | 2.556275  |
| 41 | 6 | 0 | -2.976480 | 1.063397  | 3.104306  |
| 42 | 6 | 0 | -1.900270 | 0.167602  | 3.509267  |
| 43 | 6 | 0 | -4.117298 | 0.313633  | 2.649987  |
| 44 | 6 | 0 | -3.918420 | -3.150689 | -0.221465 |
| 45 | 6 | 0 | 1.767716  | 1.123144  | 3.170446  |
| 46 | 6 | 0 | -5.211547 | -1.423701 | 0.702695  |
| 47 | 6 | 0 | -4.341468 | -1.938004 | 1.745554  |
| 48 | 6 | 0 | 0.925126  | 1.880758  | 2.176335  |
| 49 | 6 | 0 | 0.967782  | -2.615532 | 0.057881  |
| 50 | 6 | 0 | 0.041079  | -3.026086 | 1.014248  |
| 51 | 6 | 0 | -0.370875 | 1.913803  | 2.812914  |
| 52 | 6 | 0 | -0.613469 | 0.715408  | 3.584524  |
| 53 | 6 | 0 | -3.761547 | -1.083521 | 2.687925  |
| 54 | 6 | 0 | -2.371004 | -1.220736 | 3.142031  |
| 55 | 6 | 0 | 0.743584  | 0.380240  | 4.122790  |
| 56 | 6 | 0 | -3.560463 | -3.002577 | 1.182330  |
| 57 | 6 | 0 | -1.233695 | -3.502066 | 0.615772  |
| 58 | 6 | 0 | -0.133679 | -2.372591 | 2.374449  |
| 59 | 6 | 0 | -2.242019 | -3.127615 | 1.590173  |
| 60 | 6 | 0 | -1.635719 | -2.281722 | 2.592216  |
| 61 | 6 | 0 | 2.171697  | 1.916755  | -0.114107 |
| 62 | 6 | 0 | 2.947912  | -0.997526 | -0.466970 |
| 63 | 6 | 0 | 3.745370  | -0.014049 | 0.393695  |
| 64 | 6 | 0 | 3.355286  | 1.254446  | 0.547761  |
| 65 | 6 | 0 | 3.898342  | -1.639176 | -1.510228 |
| 66 | 6 | 0 | 2.743078  | 3.166104  | -0.818424 |
| 67 | 8 | 0 | 2.913744  | -2.592851 | 1.373996  |
| 68 | 8 | 0 | 2.957920  | 1.143850  | 3.370167  |
| 69 | 6 | 0 | 2.812185  | 4.405828  | -0.176070 |
| 70 | 6 | 0 | 3.410320  | 5.472961  | -0.844319 |
| 71 | 6 | 0 | 3.917564  | 5.265689  | -2.126136 |
| 72 | 6 | 0 | 3.806205  | 3.988656  | -2.678489 |
| 73 | 7 | 0 | 3.237576  | 2.956928  | -2.045962 |
| 74 | 6 | 0 | 4.252544  | -0.873074 | -2.631581 |
| 75 | 6 | 0 | 5.146788  | -1.375888 | -3.574252 |
| 76 | 6 | 0 | 5.698879  | -2.649283 | -3.411052 |
| 77 | 6 | 0 | 5.357558  | -3.407318 | -2.292141 |
| 78 | 6 | 0 | 4.464994  | -2.904861 | -1.341860 |
| 79 | 8 | 0 | 0.727781  | -1.849740 | 3.047434  |
| 80 | 8 | 0 | 1.036477  | -0.108555 | 5.183888  |
| 81 | 6 | 0 | 7.438199  | -0.762115 | 0.854597  |

|    |   |   |          |           |           |     |   |   |           |           |           |
|----|---|---|----------|-----------|-----------|-----|---|---|-----------|-----------|-----------|
| 82 | 6 | 0 | 6.221272 | -0.394715 | 0.279572  | 95  | 1 | 0 | 5.791582  | -4.392797 | -2.146723 |
| 83 | 6 | 0 | 5.032588 | -0.457819 | 1.021576  | 96  | 1 | 0 | 4.239525  | -3.494343 | -0.460721 |
| 84 | 6 | 0 | 5.086291 | -0.883141 | 2.355688  | 97  | 1 | 0 | 8.349578  | -0.709704 | 0.264382  |
| 85 | 6 | 0 | 6.304799 | -1.244636 | 2.929772  | 98  | 1 | 0 | 6.188586  | -0.060745 | -0.752821 |
| 86 | 6 | 0 | 7.482787 | -1.189951 | 2.182138  | 99  | 1 | 0 | 4.176194  | -0.931217 | 2.939167  |
| 87 | 1 | 0 | 3.954000 | 1.906898  | 1.173584  | 100 | 1 | 0 | 6.330234  | -1.570387 | 3.966209  |
| 88 | 1 | 0 | 2.405021 | 4.529118  | 0.822313  | 101 | 1 | 0 | 8.430034  | -1.475407 | 2.632839  |
| 89 | 1 | 0 | 3.477283 | 6.448467  | -0.370585 | 102 | 8 | 0 | -2.175153 | -0.218219 | -0.203132 |
| 90 | 1 | 0 | 4.389155 | 6.067835  | -2.685225 | 103 | 1 | 0 | -1.968492 | -0.209557 | 0.742624  |
| 91 | 1 | 0 | 4.191695 | 3.781394  | -3.675089 | 104 | 1 | 0 | -1.384031 | 0.152716  | -0.621087 |
| 92 | 1 | 0 | 3.846212 | 0.128670  | -2.748291 |     |   |   |           |           |           |
| 93 | 1 | 0 | 5.415254 | -0.769803 | -4.435579 |     |   |   |           |           |           |
| 94 | 1 | 0 | 6.395111 | -3.042205 | -4.147053 |     |   |   |           |           |           |

The total electronic energy was calculated to be -3527.6793144 Hartree.

**Table S47.** Optimized structure of H<sub>2</sub>O@INT1d (B3LYP-D3/6-31G(d))

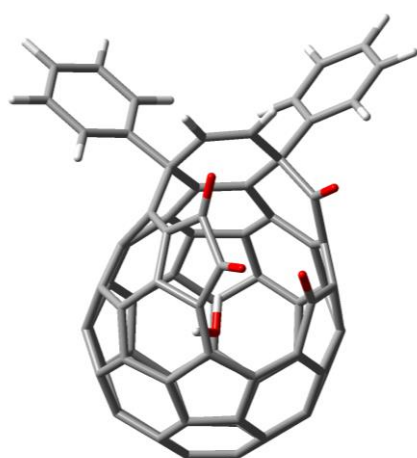

Standard orientation:

| Center Number | Atomic Number | Atomic Type | Coordinates (Angstroms) |           |           |
|---------------|---------------|-------------|-------------------------|-----------|-----------|
|               |               |             | X                       | Y         | Z         |
| 1             | 6             | 0           | -2.611629               | 1.456865  | -3.182634 |
| 2             | 6             | 0           | -1.161774               | 1.525895  | -3.245625 |
| 3             | 6             | 0           | -0.432352               | 0.372958  | -3.479632 |
| 4             | 6             | 0           | -1.104058               | -0.904048 | -3.643729 |
| 5             | 6             | 0           | -2.491832               | -0.980879 | -3.540444 |
| 6             | 6             | 0           | -3.261352               | 0.226986  | -3.304113 |
| 7             | 6             | 0           | -0.690544               | 2.487539  | -2.266695 |
| 8             | 6             | 0           | 0.795249                | 0.161030  | -2.757828 |
| 9             | 6             | 0           | -0.270695               | -1.903548 | -3.015765 |
| 10            | 6             | 0           | -3.100237               | -2.061737 | -2.784891 |
| 11            | 6             | 0           | -4.349803               | -0.107926 | -2.403154 |
| 12            | 6             | 0           | -3.052167               | 2.418728  | -2.196377 |
| 13            | 6             | 0           | -2.291175               | -3.024312 | -2.177196 |
| 14            | 6             | 0           | -0.846963               | -2.943955 | -2.298238 |
| 15            | 6             | 0           | -2.589767               | -3.474841 | -0.833259 |
| 16            | 6             | 0           | -0.249773               | -3.337885 | -1.040712 |
| 17            | 6             | 0           | 0.490921                | 2.272718  | -1.520972 |
| 18            | 6             | 0           | 0.913930                | -1.258286 | -2.493940 |
| 19            | 6             | 0           | -1.330251               | -3.667809 | -0.145572 |
| 20            | 6             | 0           | 1.555480                | -1.688692 | -1.335029 |
| 21            | 6             | 0           | 1.279144                | 1.082593  | -1.820080 |
| 22            | 6             | 0           | -4.240654               | -1.517965 | -2.070502 |
| 23            | 6             | 0           | -4.762300               | 0.809134  | -1.436414 |
| 24            | 6             | 0           | 0.559464                | 2.765190  | -0.135977 |
| 25            | 6             | 0           | -4.116620               | 2.106570  | -1.341892 |
| 26            | 6             | 0           | -1.875964               | 3.082079  | -1.672614 |
| 27            | 6             | 0           | -5.053130               | 0.358681  | -0.086722 |
| 28            | 6             | 0           | -4.047297               | 2.474142  | 0.056089  |
| 29            | 6             | 0           | -1.837605               | 3.484817  | -0.349965 |
| 30            | 6             | 0           | 0.933322                | -2.754661 | -0.548836 |
| 31            | 6             | 0           | -4.520910               | -1.949541 | -0.770000 |
| 32            | 6             | 0           | 2.240979                | 0.607848  | -0.847752 |
| 33            | 6             | 0           | -4.590500               | 1.373584  | 0.838035  |
| 34            | 6             | 0           | -2.951563               | 3.181942  | 0.538143  |
| 35            | 6             | 0           | -0.608627               | 3.345535  | 0.390357  |
| 36            | 6             | 0           | -0.973431               | 3.057973  | 1.746824  |
| 37            | 6             | 0           | 1.570795                | 2.240221  | 0.787428  |
| 38            | 6             | 0           | 2.410605                | -0.743699 | -0.645668 |
| 39            | 6             | 0           | 2.435749                | -2.164395 | 1.399663  |
| 40            | 6             | 0           | -2.383913               | 2.848146  | 1.825508  |
| 41            | 6             | 0           | -2.829412               | 1.724373  | 2.531293  |
| 42            | 6             | 0           | -1.925412               | 0.839756  | 3.254958  |
| 43            | 6             | 0           | -3.961464               | 0.992339  | 2.026578  |
| 44            | 6             | 0           | -3.673716               | -2.939131 | -0.140837 |
| 45            | 6             | 0           | 1.838566                | 1.432108  | 3.366064  |
| 46            | 6             | 0           | -4.915367               | -0.985901 | 0.245643  |
| 47            | 6             | 0           | -4.277241               | -1.364181 | 1.493921  |
| 48            | 6             | 0           | 1.236396                | 2.068271  | 2.131759  |
| 49            | 6             | 0           | 1.136045                | -2.685739 | 0.885751  |
| 50            | 6             | 0           | 0.034110                | -2.861904 | 1.721999  |
| 51            | 6             | 0           | -0.133452               | 2.304257  | 2.528365  |
| 52            | 6             | 0           | -0.612059               | 1.290642  | 3.440938  |
| 53            | 6             | 0           | -3.763459               | -0.396012 | 2.361321  |
| 54            | 6             | 0           | -2.484784               | -0.551121 | 3.064521  |
| 55            | 6             | 0           | 0.608163                | 0.970330  | 4.249654  |
| 56            | 6             | 0           | -3.530860               | -2.567467 | 1.259035  |
| 57            | 6             | 0           | -1.201667               | -3.313883 | 1.191921  |
| 58            | 6             | 0           | -2.313123               | -2.710996 | 1.903839  |
| 59            | 6             | 0           | -1.794263               | -1.748062 | 2.843967  |
| 60            | 6             | 0           | 2.828960                | 1.659389  | 0.098583  |
| 61            | 6             | 0           | 3.311724                | -1.324645 | 0.418378  |
| 62            | 6             | 0           | 4.019369                | -0.256544 | 1.215230  |
| 63            | 6             | 0           | 3.806511                | 1.047470  | 1.071004  |
| 64            | 6             | 0           | 4.382983                | -2.254607 | -0.214522 |
| 65            | 6             | 0           | 3.595394                | 2.745064  | -0.686166 |
| 66            | 8             | 0           | 2.821229                | -2.419140 | 2.523443  |
| 67            | 8             | 0           | 2.979726                | 1.374474  | 3.751451  |
| 68            | 6             | 0           | 4.418337                | 2.368683  | -1.754913 |
| 69            | 6             | 0           | 5.174774                | 3.319502  | -2.437661 |
| 70            | 6             | 0           | 5.126761                | 4.661731  | -2.053880 |
| 71            | 6             | 0           | 4.323049                | 5.041449  | -0.978824 |
| 72            | 6             | 0           | 3.563805                | 4.087948  | -0.297512 |
| 73            | 6             | 0           | 4.773387                | -2.080715 | -1.549183 |
| 74            | 6             | 0           | 5.782330                | -2.867310 | -2.104797 |
| 75            | 6             | 0           | 6.421607                | -3.838710 | -1.333487 |
| 76            | 6             | 0           | 6.048012                | -4.008777 | 0.000007  |
| 77            | 6             | 0           | 5.039098                | -3.222231 | 0.557888  |

|    |   |   |           |           |           |    |   |   |           |           |           |
|----|---|---|-----------|-----------|-----------|----|---|---|-----------|-----------|-----------|
| 78 | 8 | 0 | 0.682401  | 0.686029  | 5.417370  | 88 | 1 | 0 | 4.288742  | -1.327320 | -2.162123 |
| 79 | 6 | 0 | -0.299247 | -1.995764 | 2.930400  | 89 | 1 | 0 | 6.068156  | -2.717158 | -3.142504 |
| 80 | 8 | 0 | 0.472640  | -1.471669 | 3.700307  | 90 | 1 | 0 | 7.205749  | -4.453705 | -1.766367 |
| 81 | 1 | 0 | 4.718452  | -0.617695 | 1.961241  | 91 | 1 | 0 | 6.541259  | -4.757212 | 0.614290  |
| 82 | 1 | 0 | 4.338159  | 1.752416  | 1.699117  | 92 | 1 | 0 | 4.766171  | -3.360534 | 1.598330  |
| 83 | 1 | 0 | 4.471631  | 1.323391  | -2.047018 | 93 | 8 | 0 | -1.659422 | -0.176485 | -0.281295 |
| 84 | 1 | 0 | 5.804134  | 3.011109  | -3.268149 | 94 | 1 | 0 | -0.755812 | -0.232241 | -0.625504 |
| 85 | 1 | 0 | 5.714972  | 5.404048  | -2.586235 | 95 | 1 | 0 | -1.616393 | 0.533670  | 0.375825  |
| 86 | 1 | 0 | 4.283785  | 6.081487  | -0.666469 |    |   |   |           |           |           |
| 87 | 1 | 0 | 2.942744  | 4.394471  | 0.539016  |    |   |   |           |           |           |

The total electronic energy was calculated to be -3280.5737969 Hartree.

**Table S48.** Optimized structure of H<sub>2</sub>O@INT1e (B3LYP-D3/6-31G(d))

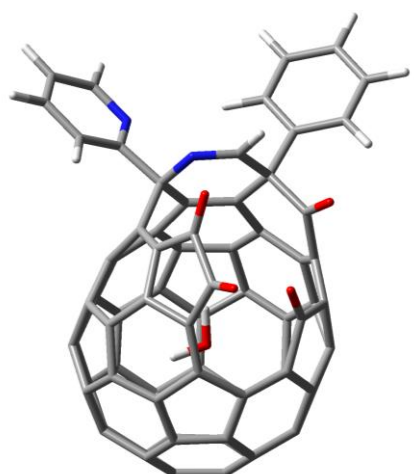

Standard orientation:

|    |   |   |           |           |           |    |   |   |           |           |           |
|----|---|---|-----------|-----------|-----------|----|---|---|-----------|-----------|-----------|
| 31 | 6 | 0 | -4.575410 | -1.909532 | -0.656455 | 31 | 6 | 0 | -4.575410 | -1.909532 | -0.656455 |
| 32 | 6 | 0 | 2.219534  | 0.471911  | -0.884790 | 32 | 6 | 0 | 2.219534  | 0.471911  | -0.884790 |
| 33 | 6 | 0 | -4.579590 | 1.514389  | 0.730458  | 33 | 6 | 0 | -4.579590 | 1.514389  | 0.730458  |
| 34 | 6 | 0 | -2.897385 | 3.261780  | 0.317437  | 34 | 6 | 0 | -2.897385 | 3.261780  | 0.317437  |
| 35 | 6 | 0 | -0.549956 | 3.360569  | 0.169952  | 35 | 6 | 0 | -0.549956 | 3.360569  | 0.169952  |
| 36 | 6 | 0 | -0.925510 | 3.177753  | 1.540918  | 36 | 6 | 0 | -0.925510 | 3.177753  | 1.540918  |
| 37 | 6 | 0 | 1.591798  | 2.224890  | 0.656056  | 37 | 6 | 0 | 1.591798  | 2.224890  | 0.656056  |
| 38 | 6 | 0 | 2.357777  | -0.861769 | -0.597573 | 38 | 6 | 0 | 2.357777  | -0.861769 | -0.597573 |
| 39 | 6 | 0 | 2.386579  | -2.172894 | 1.523528  | 39 | 6 | 0 | 2.386579  | -2.172894 | 1.523528  |
| 40 | 6 | 0 | -2.341185 | 3.004503  | 1.626912  | 40 | 6 | 0 | -2.341185 | 3.004503  | 1.626912  |
| 41 | 6 | 0 | -2.813523 | 1.939344  | 2.400404  | 41 | 6 | 0 | -2.813523 | 1.939344  | 2.400404  |
| 42 | 6 | 0 | -1.932703 | 1.087794  | 3.185730  | 42 | 6 | 0 | -1.932703 | 1.087794  | 3.185730  |
| 43 | 6 | 0 | -3.957863 | 1.198152  | 1.941715  | 43 | 6 | 0 | -3.957863 | 1.198152  | 1.941715  |
| 44 | 6 | 0 | -3.750263 | -2.873693 | 0.037644  | 44 | 6 | 0 | -3.750263 | -2.873693 | 0.037644  |
| 45 | 6 | 0 | 1.833872  | 1.583286  | 3.299646  | 45 | 6 | 0 | 1.833872  | 1.583286  | 3.299646  |
| 46 | 6 | 0 | -4.949827 | -0.872874 | 0.292953  | 46 | 6 | 0 | -4.949827 | -0.872874 | 0.292953  |
| 47 | 6 | 0 | -4.318776 | -1.181210 | 1.564020  | 47 | 6 | 0 | -4.318776 | -1.181210 | 1.564020  |
| 48 | 6 | 0 | 1.257713  | 2.159297  | 2.011997  | 48 | 6 | 0 | 1.257713  | 2.159297  | 2.011997  |
| 49 | 6 | 0 | 1.064334  | -2.674510 | 1.043361  | 49 | 6 | 0 | 1.064334  | -2.674510 | 1.043361  |
| 50 | 6 | 0 | -0.041926 | -2.761272 | 1.887199  | 50 | 6 | 0 | -0.041926 | -2.761272 | 1.887199  |
| 51 | 6 | 0 | -0.106010 | 2.464004  | 2.380413  | 51 | 6 | 0 | -0.106010 | 2.464004  | 2.380413  |
| 52 | 6 | 0 | -0.616767 | 1.528375  | 3.357442  | 52 | 6 | 0 | -0.616767 | 1.528375  | 3.357442  |
| 53 | 6 | 0 | -3.786576 | -0.169060 | 2.366657  | 53 | 6 | 0 | -3.786576 | -0.169060 | 2.366657  |
| 54 | 6 | 0 | -2.509922 | -0.301816 | 3.078194  | 54 | 6 | 0 | -2.509922 | -0.301816 | 3.078194  |
| 55 | 6 | 0 | 0.581452  | 1.227156  | 4.198436  | 55 | 6 | 0 | 0.581452  | 1.227156  | 4.198436  |
| 56 | 6 | 0 | -3.596874 | -2.412347 | 1.409795  | 56 | 6 | 0 | -3.596874 | -2.412347 | 1.409795  |
| 57 | 6 | 0 | -1.288196 | -3.218484 | 1.391799  | 57 | 6 | 0 | -1.288196 | -3.218484 | 1.391799  |
| 58 | 6 | 0 | -2.380638 | -2.536437 | 2.060704  | 58 | 6 | 0 | -2.380638 | -2.536437 | 2.060704  |
| 59 | 6 | 0 | -1.837638 | -1.521439 | 2.932649  | 59 | 6 | 0 | -1.837638 | -1.521439 | 2.932649  |
| 60 | 6 | 0 | 2.822184  | 1.536716  | 0.027735  | 60 | 6 | 0 | 2.822184  | 1.536716  | 0.027735  |
| 61 | 6 | 0 | 3.236002  | -1.345658 | 0.524476  | 61 | 6 | 0 | 3.236002  | -1.345658 | 0.524476  |
| 62 | 6 | 0 | 3.858129  | -0.185698 | 1.291800  | 62 | 6 | 0 | 3.858129  | -0.185698 | 1.291800  |
| 63 | 7 | 0 | 3.707466  | 1.053677  | 1.076268  | 63 | 7 | 0 | 3.707466  | 1.053677  | 1.076268  |
| 64 | 6 | 0 | 4.407746  | -2.175584 | -0.055523 | 64 | 6 | 0 | 4.407746  | -2.175584 | -0.055523 |
| 65 | 6 | 0 | 3.681194  | 2.520627  | -0.788914 | 65 | 6 | 0 | 3.681194  | 2.520627  | -0.788914 |
| 66 | 8 | 0 | 2.804272  | -2.435356 | 2.634393  | 66 | 8 | 0 | 2.804272  | -2.435356 | 2.634393  |
| 67 | 8 | 0 | 2.964482  | 1.496919  | 3.701852  | 67 | 8 | 0 | 2.964482  | 1.496919  | 3.701852  |
| 68 | 6 | 0 | 3.896212  | 3.828824  | -0.347876 | 68 | 6 | 0 | 3.896212  | 3.828824  | -0.347876 |
| 69 | 6 | 0 | 4.738142  | 4.650597  | -1.092764 | 69 | 6 | 0 | 4.738142  | 4.650597  | -1.092764 |
| 70 | 6 | 0 | 5.337278  | 4.135327  | -2.243053 | 70 | 6 | 0 | 5.337278  | 4.135327  | -2.243053 |
| 71 | 6 | 0 | 5.070530  | 2.811115  | -2.589132 | 71 | 6 | 0 | 5.070530  | 2.811115  | -2.589132 |
| 72 | 7 | 0 | 4.261049  | 2.012984  | -1.881602 | 72 | 7 | 0 | 4.261049  | 2.012984  | -1.881602 |
| 73 | 6 | 0 | 5.113448  | -1.630150 | -1.139746 | 73 | 6 | 0 | 5.113448  | -1.630150 | -1.139746 |
| 74 | 6 | 0 | 6.188632  | -2.319973 | -1.696157 | 74 | 6 | 0 | 6.188632  | -2.319973 | -1.696157 |
| 75 | 6 | 0 | 6.574660  | -3.558696 | -1.178539 | 75 | 6 | 0 | 6.574660  | -3.558696 | -1.178539 |
| 76 | 6 | 0 | 5.883904  | -4.095427 | -0.092747 | 76 | 6 | 0 | 5.883904  | -4.095427 | -0.092747 |
| 77 | 6 | 0 | 4.807750  | -3.406741 | 0.472926  | 77 | 6 | 0 | 4.807750  | -3.406741 | 0.472926  |
| 78 | 8 | 0 | 0.632031  | 1.016230  | 5.383432  | 78 | 8 | 0 | 0.632031  | 1.016230  | 5.383432  |
| 79 | 6 | 0 | -0.344645 | -1.780068 | 3.009146  | 79 | 6 | 0 | -0.344645 | -1.780068 | 3.009146  |
| 80 | 8 | 0 | 0.463584  | -1.183018 | 3.685469  | 80 | 8 | 0 | 0.463584  | -1.183018 | 3.685469  |
| 81 | 1 | 0 | 4.501254  | -0.479668 | 2.120805  | 81 | 1 | 0 | 4.501254  | -0.479668 | 2.120805  |
| 82 | 1 | 0 | 3.419991  | 4.182628  | 0.560309  | 82 | 1 | 0 | 3.419991  | 4.182628  | 0.560309  |
| 83 | 1 | 0 | 4.925699  | 5.673853  | -0.779551 | 83 | 1 | 0 | 4.925699  | 5.673853  | -0.779551 |

|    |   |   |          |           |           |    |   |   |           |           |           |
|----|---|---|----------|-----------|-----------|----|---|---|-----------|-----------|-----------|
| 84 | 1 | 0 | 5.999037 | 4.740326  | -2.855145 | 90 | 1 | 0 | 4.297285  | -3.830863 | 1.329653  |
| 85 | 1 | 0 | 5.524450 | 2.366048  | -3.472459 | 91 | 8 | 0 | -1.557578 | -0.246700 | -0.262609 |
| 86 | 1 | 0 | 4.824715 | -0.661830 | -1.541899 | 92 | 1 | 0 | -0.600751 | -0.098813 | -0.218054 |
| 87 | 1 | 0 | 6.726717 | -1.886099 | -2.534701 | 93 | 1 | 0 | -1.928255 | 0.647206  | -0.298720 |
| 88 | 1 | 0 | 7.411716 | -4.097280 | -1.614352 |    |   |   |           |           |           |
| 89 | 1 | 0 | 6.181145 | -5.053761 | 0.324374  |    |   |   |           |           |           |

The total electronic energy was calculated to be -3312.6503141 Hartree.

**Table S49.** Optimized structure of H<sub>2</sub>O@INT1f (B3LYP-D3/6-31G(d))

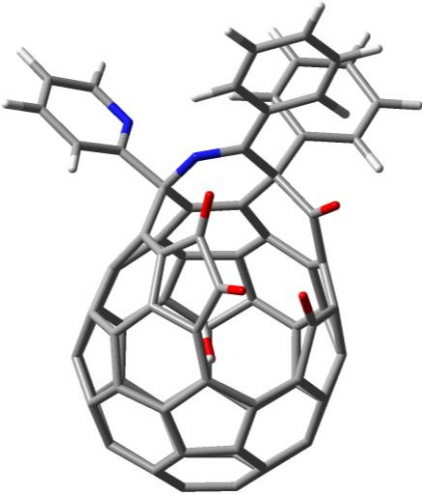

|    |   |   |           |           |           |
|----|---|---|-----------|-----------|-----------|
| 33 | 6 | 0 | -4.890408 | 1.427432  | 1.378788  |
| 34 | 6 | 0 | -3.377349 | 3.211298  | 0.624828  |
| 35 | 6 | 0 | -1.101489 | 3.378874  | 0.051908  |
| 36 | 6 | 0 | -1.216727 | 3.224431  | 1.472144  |
| 37 | 6 | 0 | 1.133038  | 2.326078  | 0.169423  |
| 38 | 6 | 0 | 1.786502  | -0.749067 | -1.116804 |
| 39 | 6 | 0 | 2.227667  | -1.952497 | 1.011532  |
| 40 | 6 | 0 | -2.586204 | 3.013090  | 1.817895  |
| 41 | 6 | 0 | -2.874542 | 1.963648  | 2.696988  |
| 42 | 6 | 0 | -1.835527 | 1.165920  | 3.334861  |
| 43 | 6 | 0 | -4.056250 | 1.173293  | 2.470502  |
| 44 | 6 | 0 | -4.037877 | -2.950253 | 0.664379  |
| 45 | 6 | 0 | 1.875258  | 1.774987  | 2.724986  |
| 46 | 6 | 0 | -5.248586 | -0.982953 | 1.079106  |
| 47 | 6 | 0 | -4.389945 | -1.228845 | 2.223907  |
| 48 | 6 | 0 | 1.050649  | 2.291688  | 1.561641  |
| 49 | 6 | 0 | 0.864773  | -2.526552 | 0.781602  |
| 50 | 6 | 0 | -0.063598 | -2.637906 | 1.816704  |
| 51 | 6 | 0 | -0.233351 | 2.563581  | 2.166679  |
| 52 | 6 | 0 | -0.522223 | 1.644511  | 3.244125  |
| 53 | 6 | 0 | -3.763701 | -0.173953 | 2.894799  |
| 54 | 6 | 0 | -2.377438 | -0.244374 | 3.373907  |
| 55 | 6 | 0 | 0.826258  | 1.410151  | 3.854140  |
| 56 | 6 | 0 | -3.660795 | -2.440342 | 1.974767  |
| 57 | 6 | 0 | -1.358080 | -3.161364 | 1.564451  |
| 58 | 6 | 0 | -0.203873 | -1.663238 | 2.977689  |
| 59 | 6 | 0 | -2.344623 | -2.504712 | 2.402993  |
| 60 | 6 | 0 | -1.698098 | -1.447658 | 3.142027  |
| 61 | 6 | 0 | 2.254792  | 1.662590  | -0.654054 |
| 62 | 6 | 0 | 2.895554  | -1.191370 | -0.179770 |
| 63 | 6 | 0 | 3.708884  | 0.016520  | 0.357734  |
| 64 | 7 | 0 | 3.355032  | 1.231744  | 0.169627  |
| 65 | 6 | 0 | 3.785440  | -2.122750 | -1.035943 |
| 66 | 6 | 0 | 2.908391  | 2.660819  | -1.636396 |
| 67 | 8 | 0 | 2.791240  | -2.121302 | 2.072387  |
| 68 | 8 | 0 | 3.064674  | 1.748440  | 2.908424  |
| 69 | 6 | 0 | 3.066681  | 4.010457  | -1.313140 |
| 70 | 6 | 0 | 3.736915  | 4.835059  | -2.213872 |
| 71 | 6 | 0 | 4.226902  | 4.282563  | -3.397495 |
| 72 | 6 | 0 | 4.028638  | 2.919789  | -3.619824 |
| 73 | 7 | 0 | 3.385785  | 2.118740  | -2.761853 |
| 74 | 6 | 0 | 4.494732  | -1.543665 | -2.096958 |
| 75 | 6 | 0 | 5.277611  | -2.336750 | -2.933382 |
| 76 | 6 | 0 | 5.352419  | -3.716722 | -2.729259 |
| 77 | 6 | 0 | 4.636025  | -4.297731 | -1.682936 |
| 78 | 6 | 0 | 3.853479  | -3.505422 | -0.840496 |
| 79 | 8 | 0 | 0.676828  | -1.052211 | 3.538931  |
| 80 | 8 | 0 | 1.103991  | 1.250693  | 5.015028  |
| 81 | 6 | 0 | 6.761506  | -1.527958 | 2.088821  |
| 82 | 6 | 0 | 5.544842  | -1.430749 | 1.415808  |
| 83 | 6 | 0 | 4.987587  | -0.178719 | 1.110930  |
| 84 | 6 | 0 | 5.692319  | 0.973231  | 1.512717  |
| 85 | 6 | 0 | 6.902834  | 0.874784  | 2.187917  |
| 86 | 6 | 0 | 7.447992  | -0.378675 | 2.477375  |
| 87 | 1 | 0 | 2.678526  | 4.397655  | -0.377129 |
| 88 | 1 | 0 | 3.875570  | 5.890070  | -1.994211 |
| 89 | 1 | 0 | 4.753195  | 4.888053  | -4.128915 |

Standard orientation:

| Center Number | Atomic Number | Atomic Type | Coordinates (Angstroms) |           |           |
|---------------|---------------|-------------|-------------------------|-----------|-----------|
|               |               |             | X                       | Y         | Z         |
| 1             | 6             | 0           | -3.650105               | 1.136255  | -2.918439 |
| 2             | 6             | 0           | -2.236982               | 1.214616  | -3.247417 |
| 3             | 6             | 0           | -1.529680               | 0.050340  | -3.499733 |
| 4             | 6             | 0           | -2.184081               | -1.243898 | -3.418435 |
| 5             | 6             | 0           | -3.529097               | -1.324007 | -3.061909 |
| 6             | 6             | 0           | -4.277962               | -0.106270 | -2.807581 |
| 7             | 6             | 0           | -1.627478               | 2.270775  | -2.459889 |
| 8             | 6             | 0           | -0.187848               | -0.078398 | -2.997174 |
| 9             | 6             | 0           | -1.224738               | -2.167428 | -2.855993 |
| 10            | 6             | 0           | -3.963999               | -2.331312 | -2.110415 |
| 11            | 6             | 0           | -5.180080               | -0.362414 | -1.698733 |
| 12            | 6             | 0           | -3.936599               | 2.185321  | -1.964587 |
| 13            | 6             | 0           | -3.033560               | -3.220403 | -1.568070 |
| 14            | 6             | 0           | -1.636563               | -3.138753 | -1.952658 |
| 15            | 6             | 0           | -3.077744               | -3.538714 | -0.155719 |
| 16            | 6             | 0           | -0.816822               | -3.399827 | -0.789791 |
| 17            | 6             | 0           | -0.327378               | 2.139335  | -1.919064 |
| 18            | 6             | 0           | 0.016518                | -1.462715 | -2.622050 |
| 19            | 6             | 0           | -1.711545               | -3.648068 | 0.311711  |
| 20            | 6             | 0           | 0.862719                | -1.771173 | -1.559891 |
| 21            | 6             | 0           | 0.425179                | 0.935593  | -2.249626 |
| 22            | 6             | 0           | -4.975265               | -1.732009 | -1.259318 |
| 23            | 6             | 0           | -5.441371               | 0.640449  | -0.765247 |
| 24            | 6             | 0           | -0.028584               | 2.758689  | -0.614740 |
| 25            | 6             | 0           | -4.825085               | 1.947371  | -0.909261 |
| 26            | 6             | 0           | -2.704500               | 2.906317  | -1.720954 |
| 27            | 6             | 0           | -5.478430               | 0.321466  | 0.650697  |
| 28            | 6             | 0           | -4.521805               | 2.451018  | 0.412821  |
| 29            | 6             | 0           | -2.444307               | 3.434941  | -0.470100 |
| 30            | 6             | 0           | 0.415194                | -2.753666 | -0.576613 |
| 31            | 6             | 0           | -5.010588               | -2.037070 | 0.105195  |
| 32            | 6             | 0           | 1.543060                | 0.561434  | -1.420020 |

|    |   |   |          |           |           |                                                                         |   |   |           |           |           |
|----|---|---|----------|-----------|-----------|-------------------------------------------------------------------------|---|---|-----------|-----------|-----------|
| 90 | 1 | 0 | 4.401787 | 2.445473  | -4.525583 | 98                                                                      | 1 | 0 | 5.260151  | 1.941097  | 1.296513  |
| 91 | 1 | 0 | 4.416625 | -0.473548 | -2.274588 | 99                                                                      | 1 | 0 | 7.421215  | 1.779851  | 2.493037  |
| 92 | 1 | 0 | 5.827818 | -1.874718 | -3.748571 | 100                                                                     | 1 | 0 | 8.395631  | -0.457541 | 3.004020  |
| 93 | 1 | 0 | 5.962738 | -4.334160 | -3.382472 | 101                                                                     | 8 | 0 | -2.160655 | -0.191133 | -0.112650 |
| 94 | 1 | 0 | 4.684869 | -5.370230 | -1.515534 | 102                                                                     | 1 | 0 | -1.942426 | 0.189823  | 0.750342  |
| 95 | 1 | 0 | 3.316599 | -3.972853 | -0.020527 | 103                                                                     | 1 | 0 | -1.375724 | -0.015977 | -0.652388 |
| 96 | 1 | 0 | 7.167866 | -2.510660 | 2.312017  | -----                                                                   |   |   |           |           |           |
| 97 | 1 | 0 | 5.036367 | -2.341816 | 1.144166  | The total electronic energy was calculated to be -3543.7164107 Hartree. |   |   |           |           |           |

## 8. References

- (1) Y. Murata, M. Murata and K. Komatsu, *Chem. Eur. J.*, 2003, **9**, 1600–1609.
- (2) Sheldrick, G. M. *SHELX-97*; University of Göttingen: Göttingen, Germany, 1997.
